# Supplementary material for: Synthesis of cyanoformamides from primary amines and carbon dioxide under mild conditions. Synthesis of ceratinamine
Source: Royal Society of Chemistry journal article supplement (doi:10.1039/b912043b), 2009-01-01

## Supplementary Information for

### Synthesis of Cyanoforamides from Primary Amines and Carbon Dioxide under Mild Conditions. Synthesis of Ceratinamine

Eduardo García-Egido, Jairo Paz, Beatriz Iglesias and Luis Muñoz\*

Departamento de Química Orgánica, Facultad de Química, Universidade de Vigo,  
36310 Vigo, Spain.

e-mail: lmunoz@uvigo.es

#### Contents:

|                                                                                           |         |
|-------------------------------------------------------------------------------------------|---------|
| <sup>1</sup> H and <sup>13</sup> C NMR spectra of <b>8a</b>                               | S2      |
| <sup>1</sup> H and <sup>13</sup> C NMR spectra of <b>12a</b>                              | S3      |
| <sup>1</sup> H and <sup>13</sup> C NMR spectra of <b>11a</b>                              | S4      |
| <sup>1</sup> H and <sup>13</sup> C NMR spectra of <b>8b</b>                               | S5      |
| <sup>1</sup> H and <sup>13</sup> C NMR spectra of <b>8c</b>                               | S6      |
| <sup>1</sup> H and <sup>13</sup> C NMR spectra of <b>8d</b>                               | S7      |
| <sup>1</sup> H and <sup>13</sup> C NMR spectra of <b>8e</b>                               | S8      |
| <sup>1</sup> H and <sup>13</sup> C NMR spectra of <b>8f</b>                               | S9      |
| <sup>1</sup> H and <sup>13</sup> C NMR spectra of <b>8g</b>                               | S10     |
| <sup>1</sup> H and <sup>13</sup> C NMR spectra of <b>8h</b>                               | S11     |
| <sup>1</sup> H and <sup>13</sup> C NMR spectra of <b>8i</b>                               | S12     |
| <sup>1</sup> H and <sup>13</sup> C NMR spectra of <b>11i</b>                              | S13     |
| <sup>1</sup> H and <sup>13</sup> C NMR spectra of <b>8j</b>                               | S14     |
| <sup>1</sup> H and <sup>13</sup> C NMR spectra of <b>8k</b>                               | S15     |
| <sup>1</sup> H and <sup>13</sup> C NMR spectra of <b>8l</b>                               | S16     |
| <sup>1</sup> H and <sup>13</sup> C NMR spectra of <b>8m</b>                               | S17     |
| <sup>1</sup> H and <sup>13</sup> C NMR spectra of <b>8o</b>                               | S18     |
| <sup>1</sup> H and <sup>13</sup> C NMR spectra of <b>8p</b>                               | S19     |
| <sup>1</sup> H and <sup>13</sup> C NMR spectra of <b>13</b>                               | S20-S21 |
| <sup>1</sup> H and <sup>13</sup> C NMR spectra of <b>12p</b>                              | S22     |
| <sup>1</sup> H and <sup>13</sup> C NMR spectra of <b>8q</b>                               | S23     |
| <sup>1</sup> H and <sup>13</sup> C NMR spectra of <b>8r</b>                               | S24     |
| <sup>1</sup> H and <sup>13</sup> C NMR spectra of <b>10c</b>                              | S25     |
| <sup>1</sup> H and <sup>13</sup> C NMR spectra of 1,3-bis[( <i>R</i> )-1-phenylethyl]urea | S26     |
| <sup>1</sup> H and <sup>13</sup> C NMR spectra of <i>tert</i> -butyl 8-aminoctylcarbamate | S27     |
| <sup>1</sup> H and <sup>13</sup> C NMR spectra of <b>14</b>                               | S28     |
| <sup>1</sup> H and <sup>13</sup> C NMR spectra of <b>15</b>                               | S29     |
| <sup>1</sup> H and <sup>13</sup> C NMR spectra of <b>17</b>                               | S30     |
| <sup>1</sup> H and <sup>13</sup> C NMR spectra of <b>18</b>                               | S31     |
| <sup>1</sup> H and <sup>13</sup> C NMR spectra of <b>19</b>                               | S32     |
| <sup>1</sup> H and <sup>13</sup> C NMR spectra of <b>20</b>                               | S33     |
| <sup>1</sup> H and <sup>13</sup> C NMR spectra of <b>21</b>                               | S34     |
| <sup>1</sup> H and <sup>13</sup> C NMR spectra of <b>22</b>                               | S35     |
| <sup>1</sup> H and <sup>13</sup> C NMR spectra of <b>1</b>                                | S36-S37 |

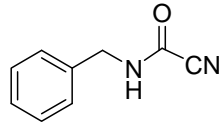

**8a**

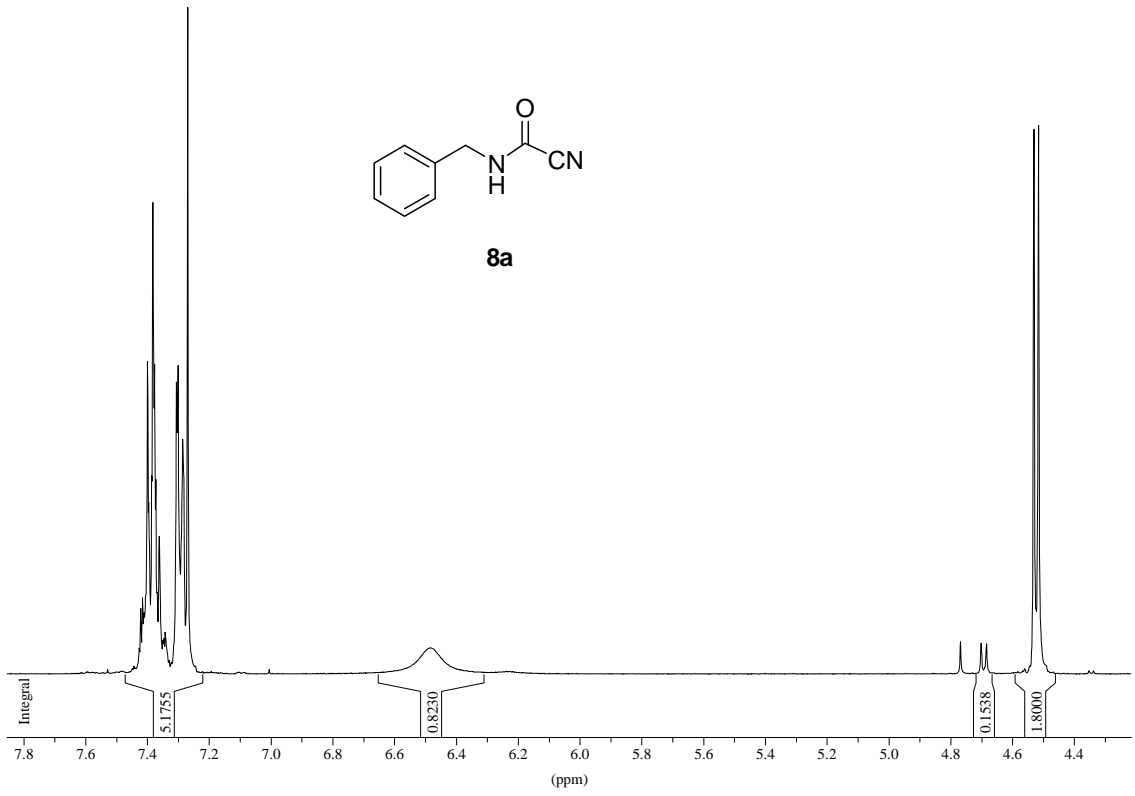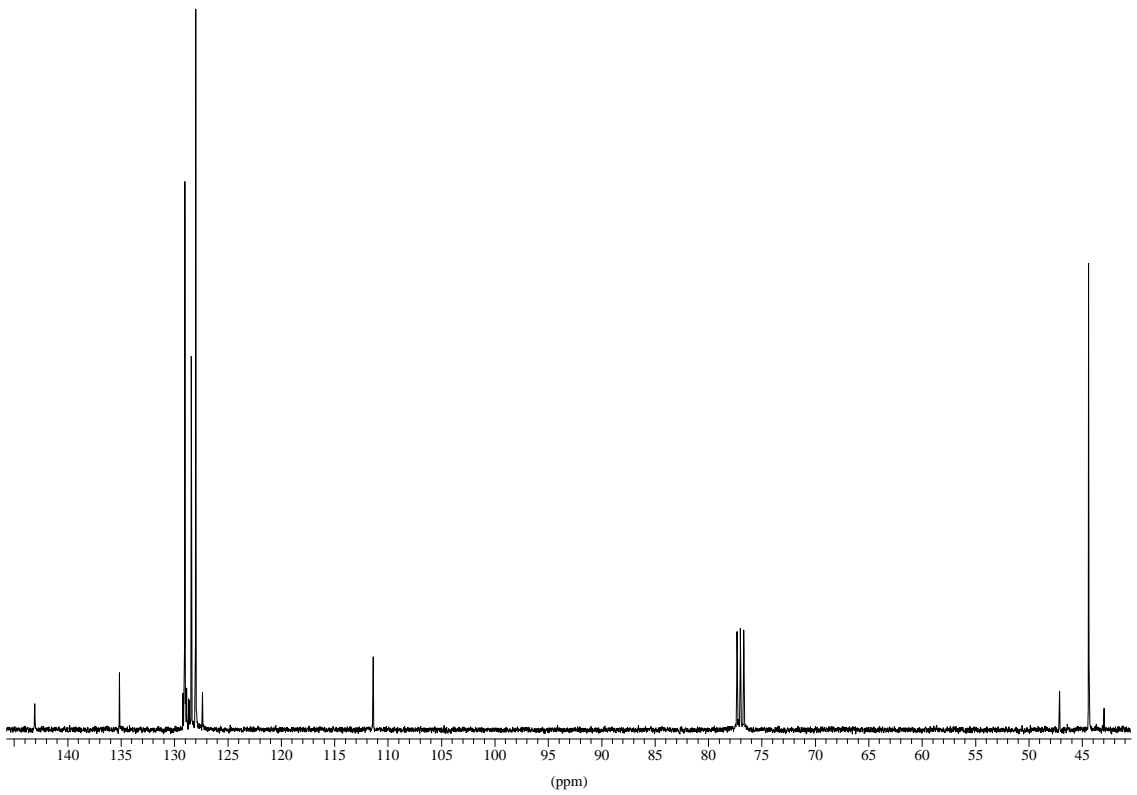

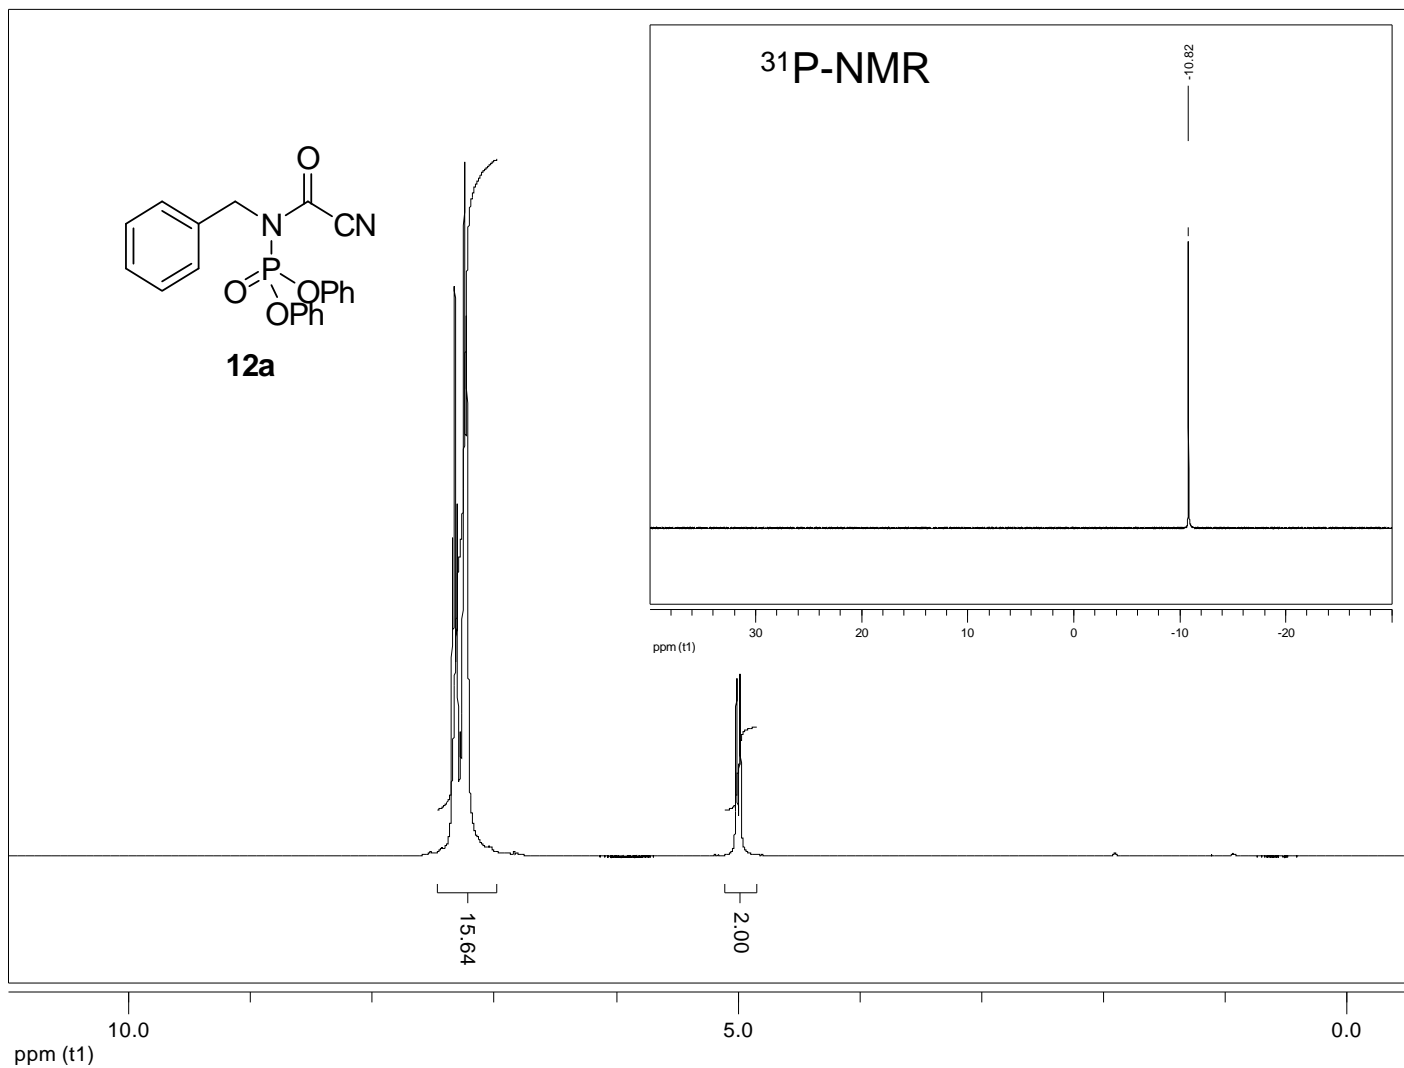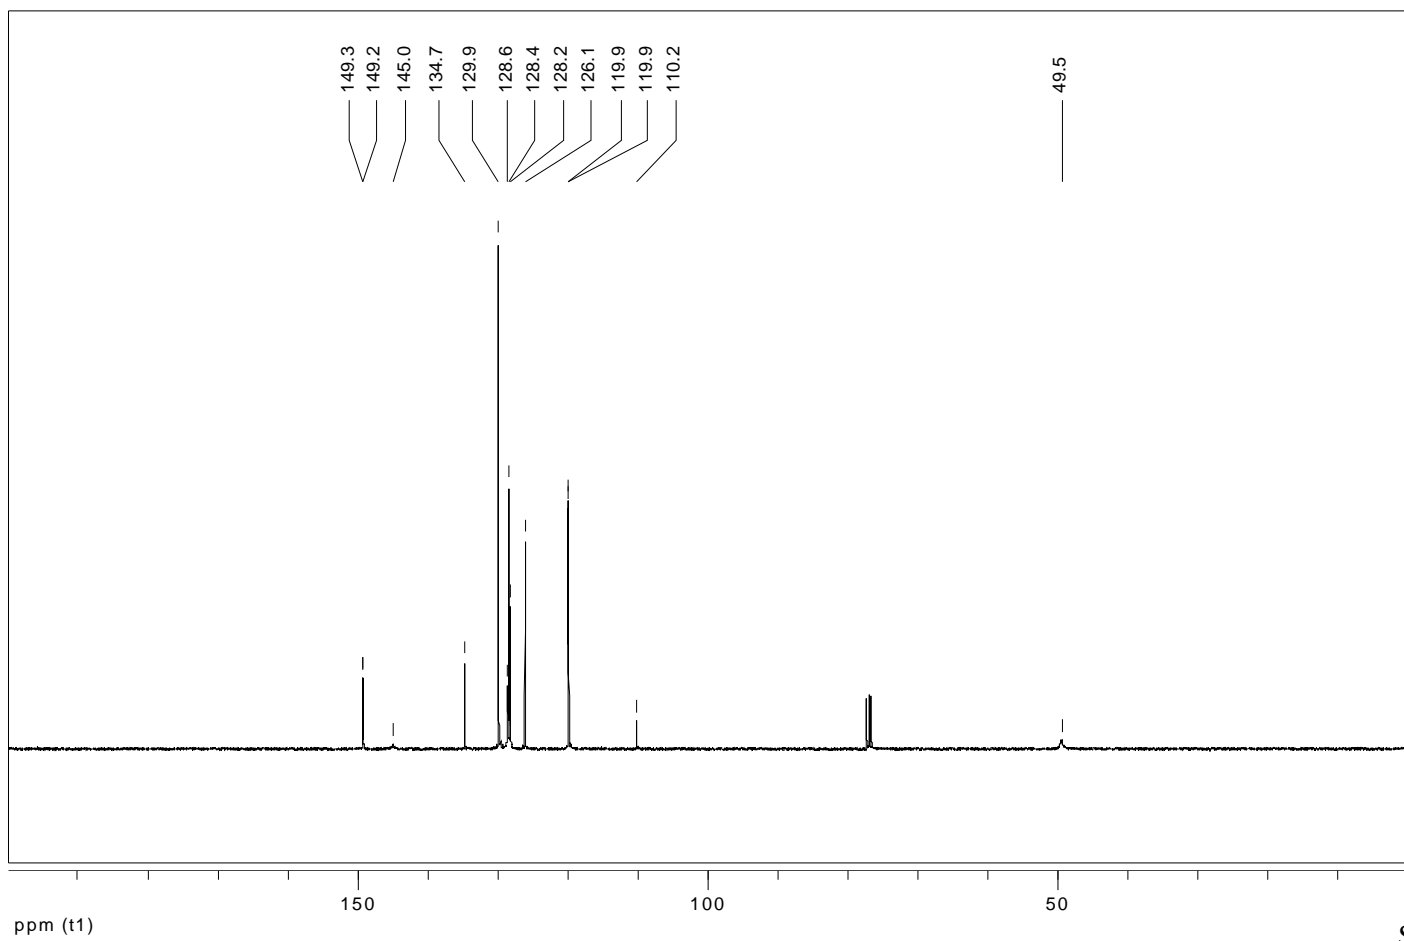

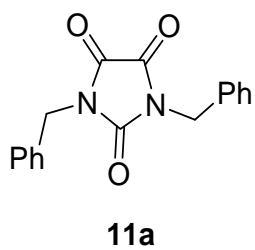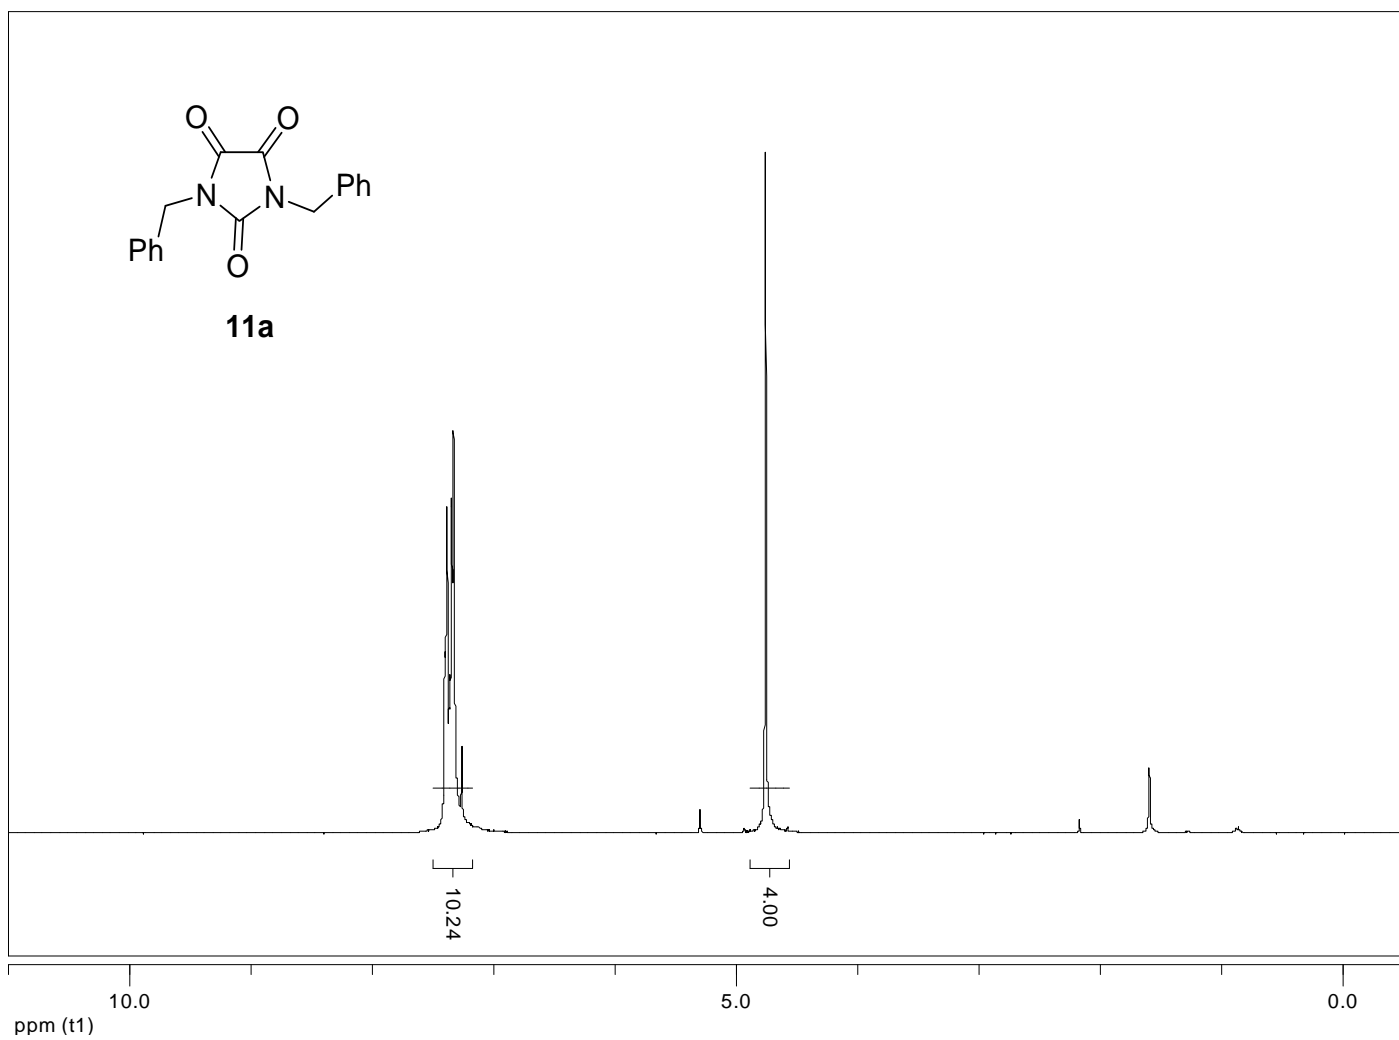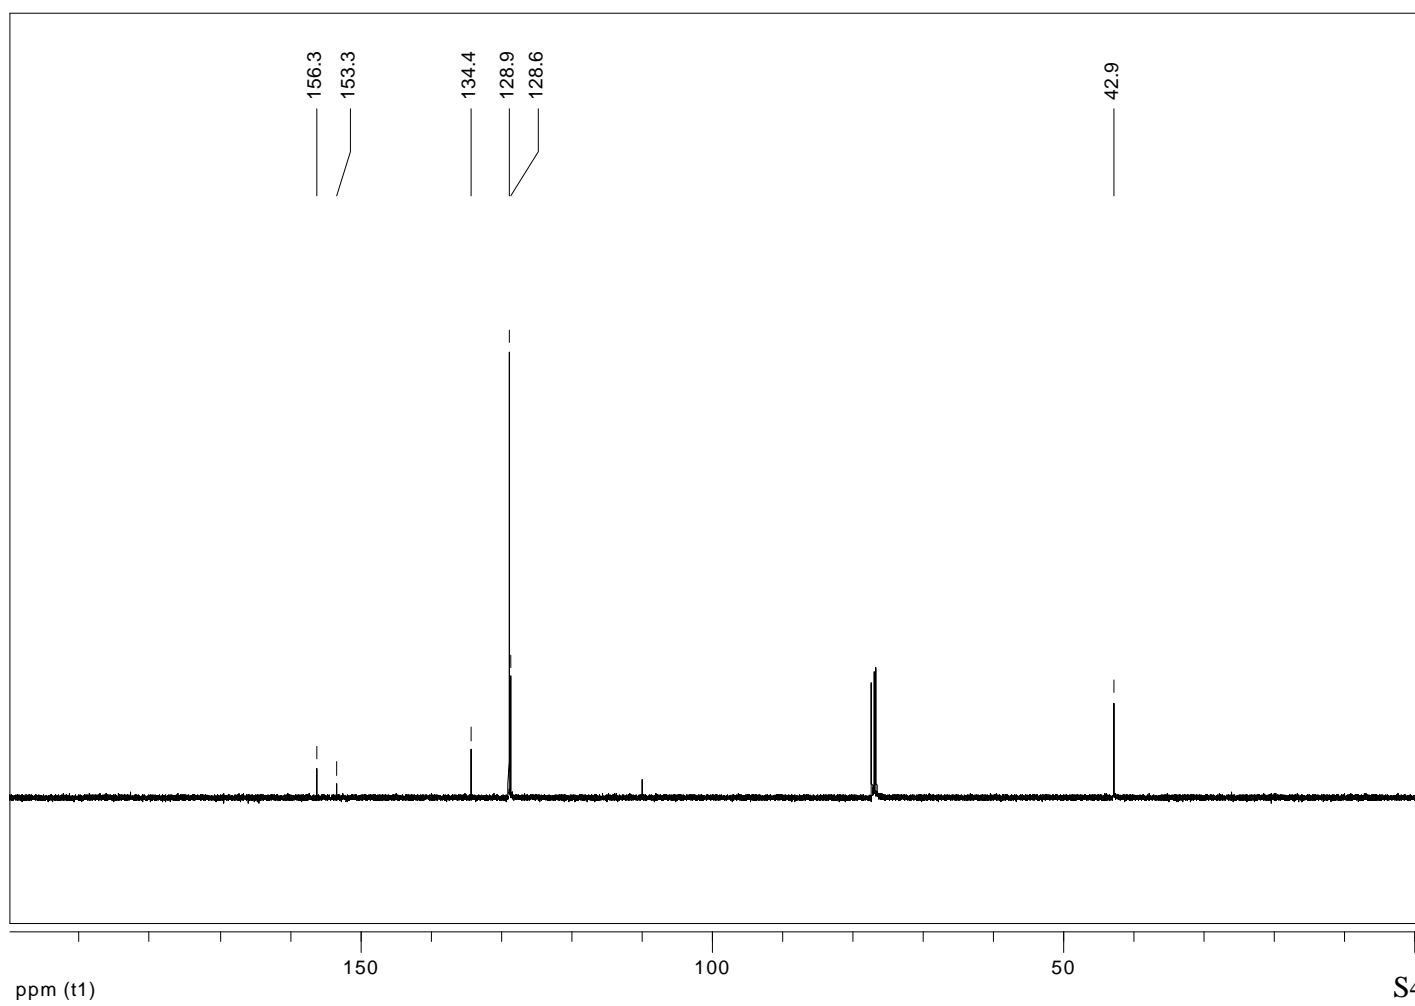

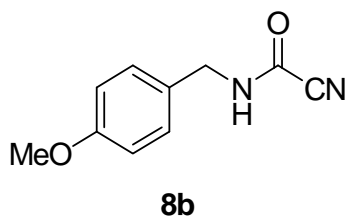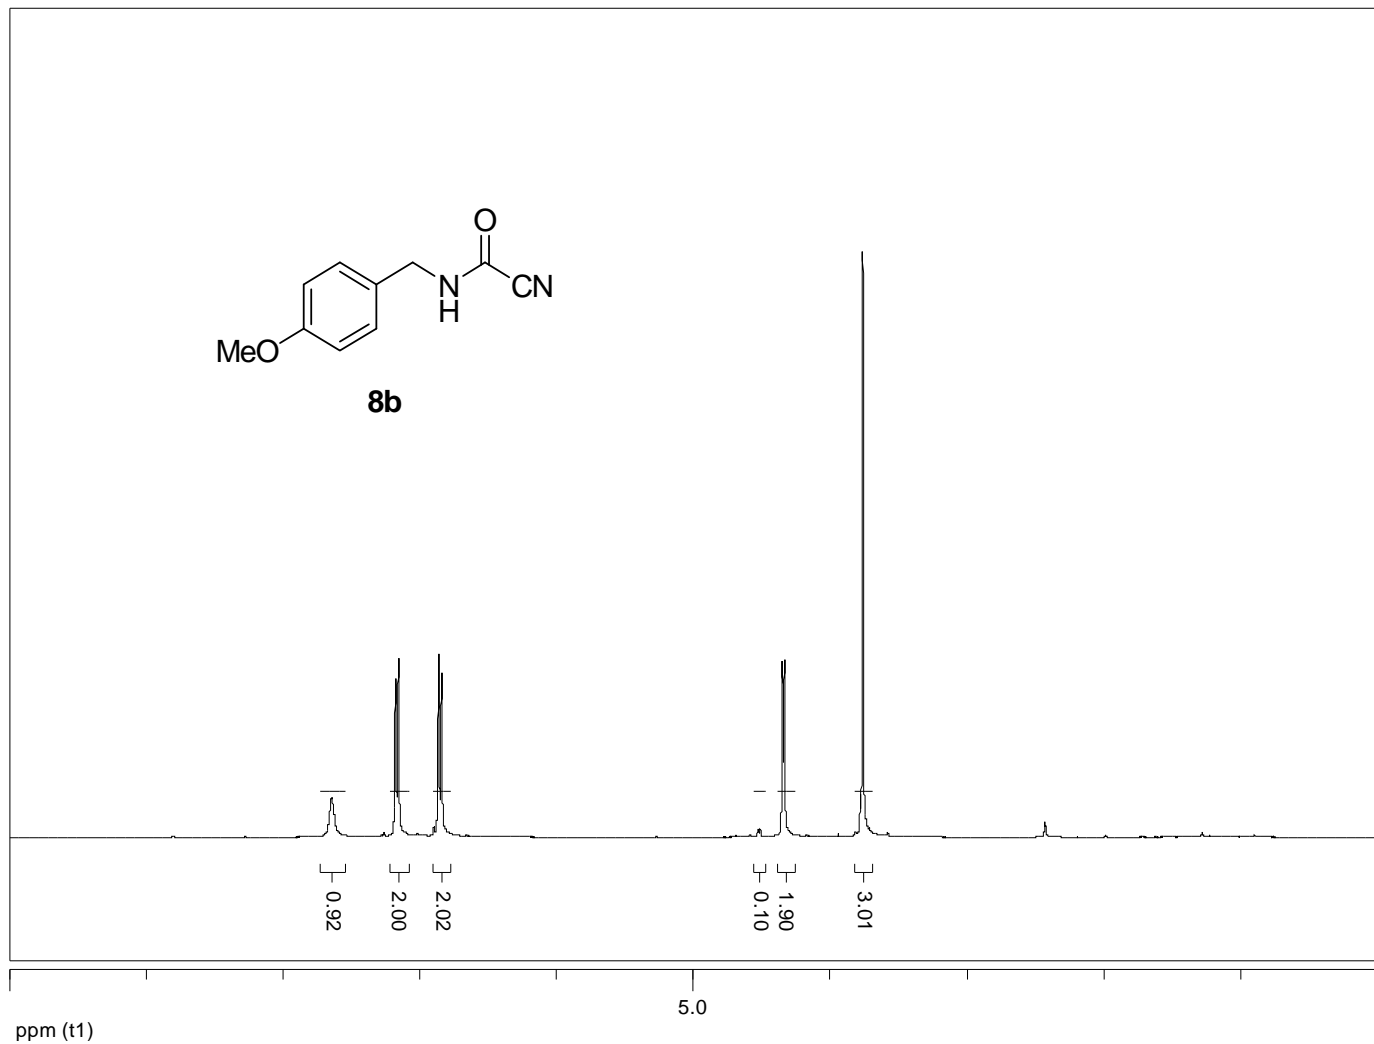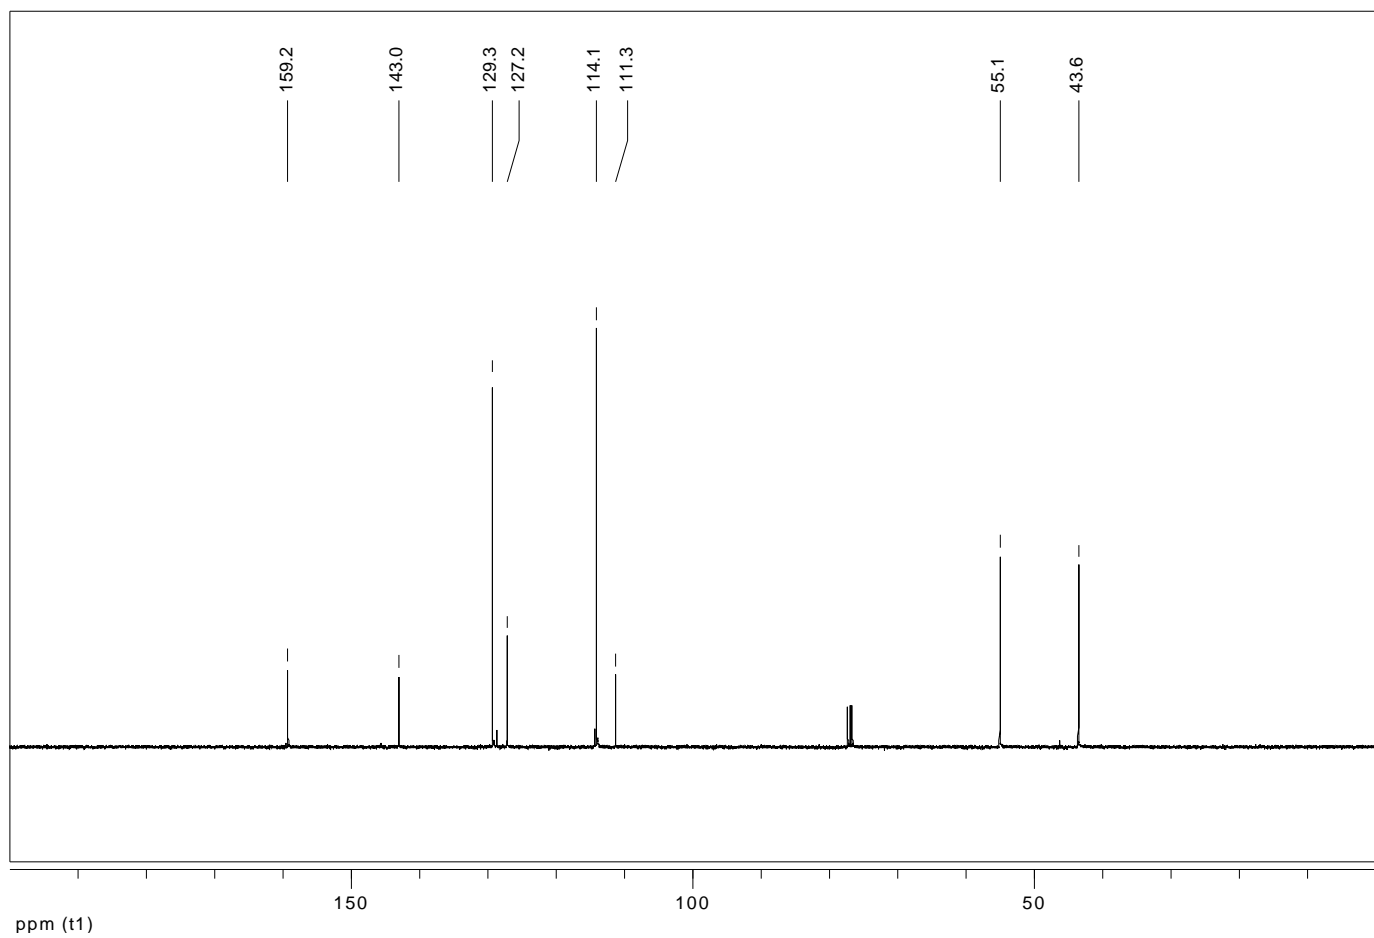

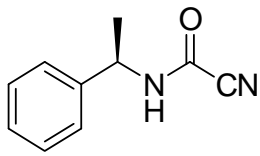

**8c**

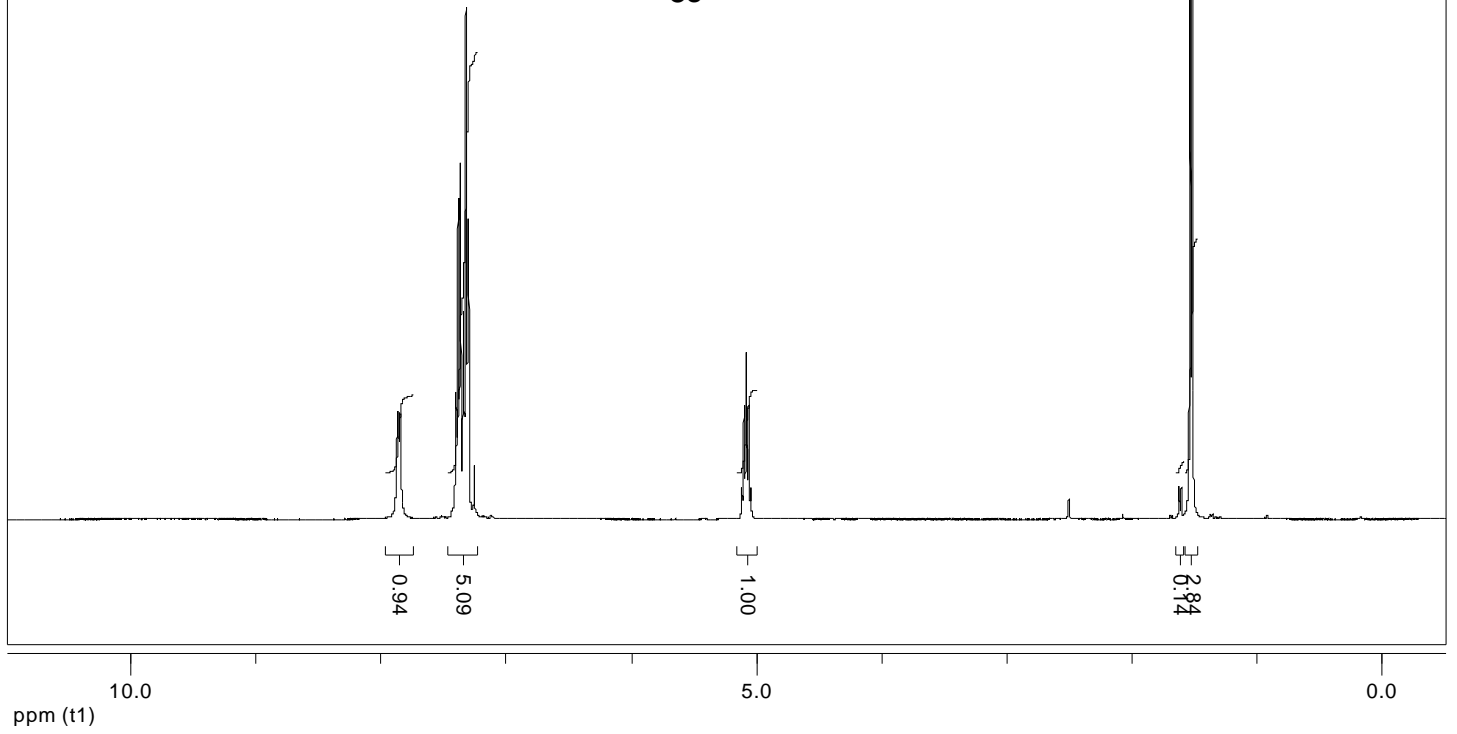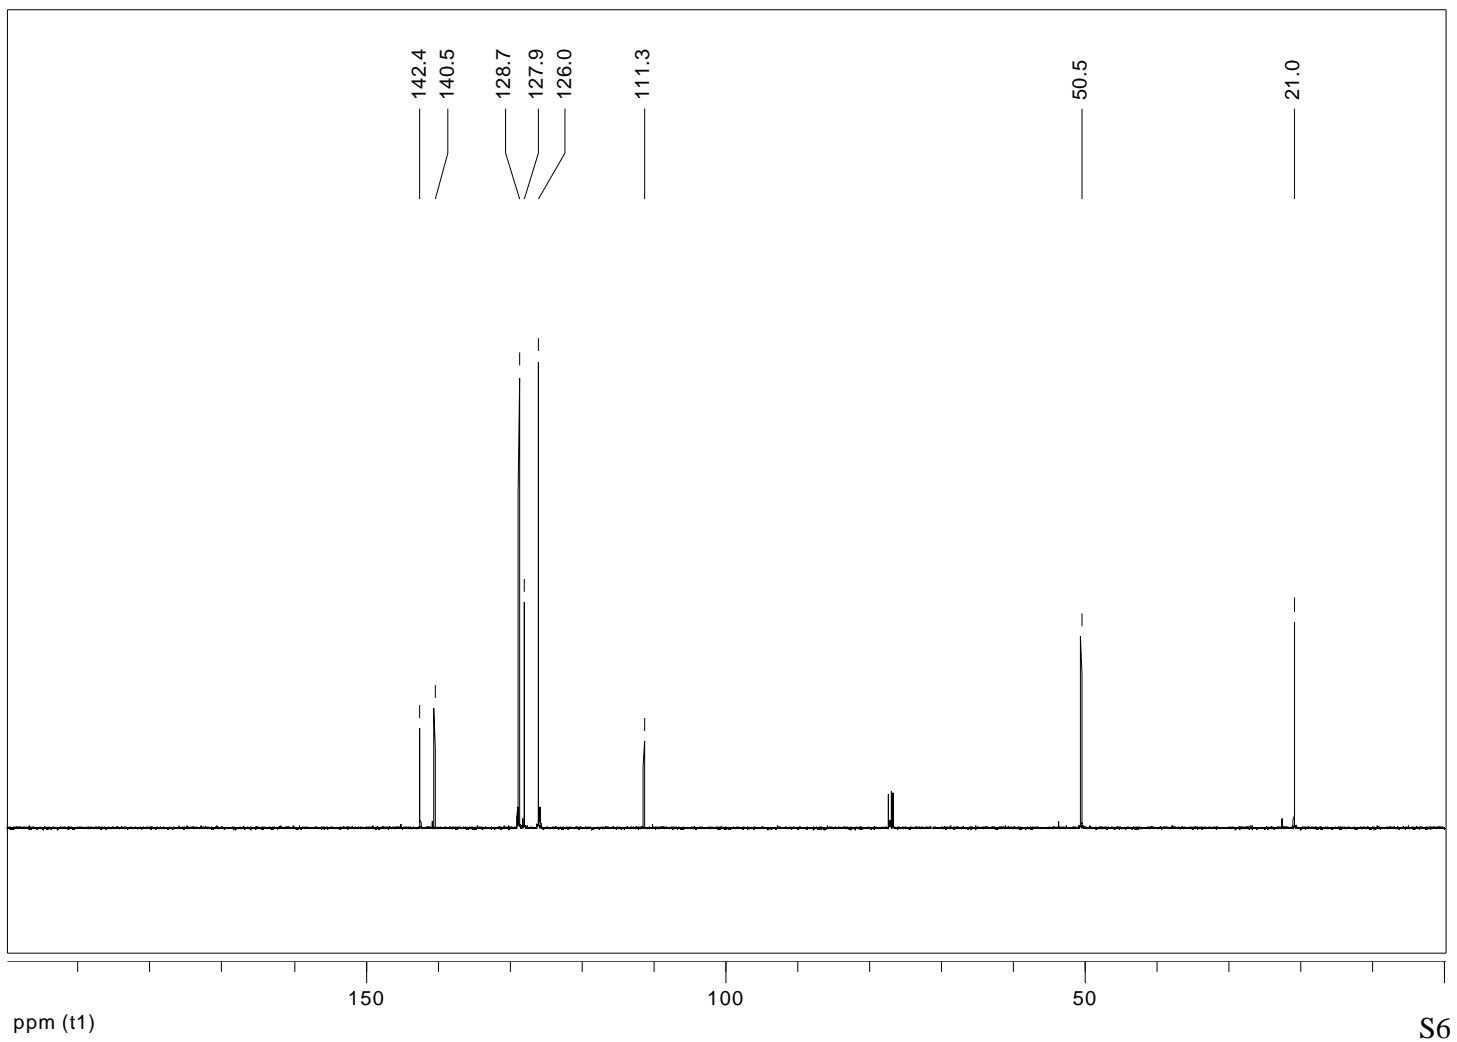

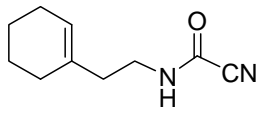

**8d**

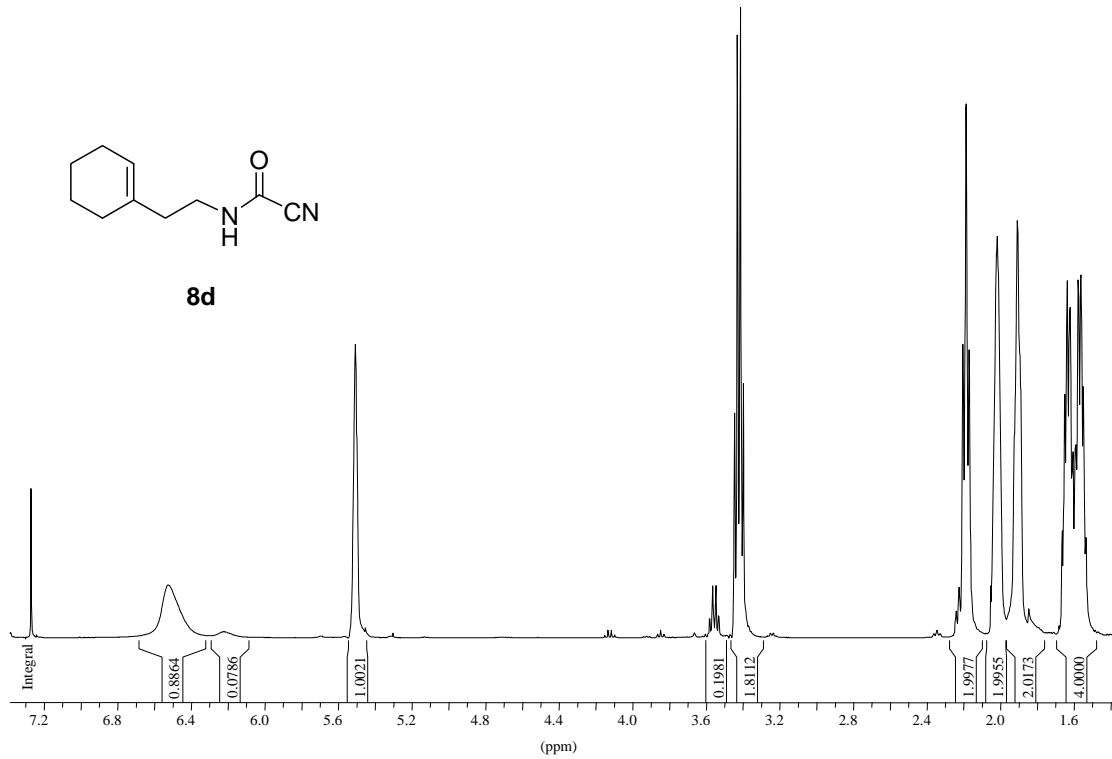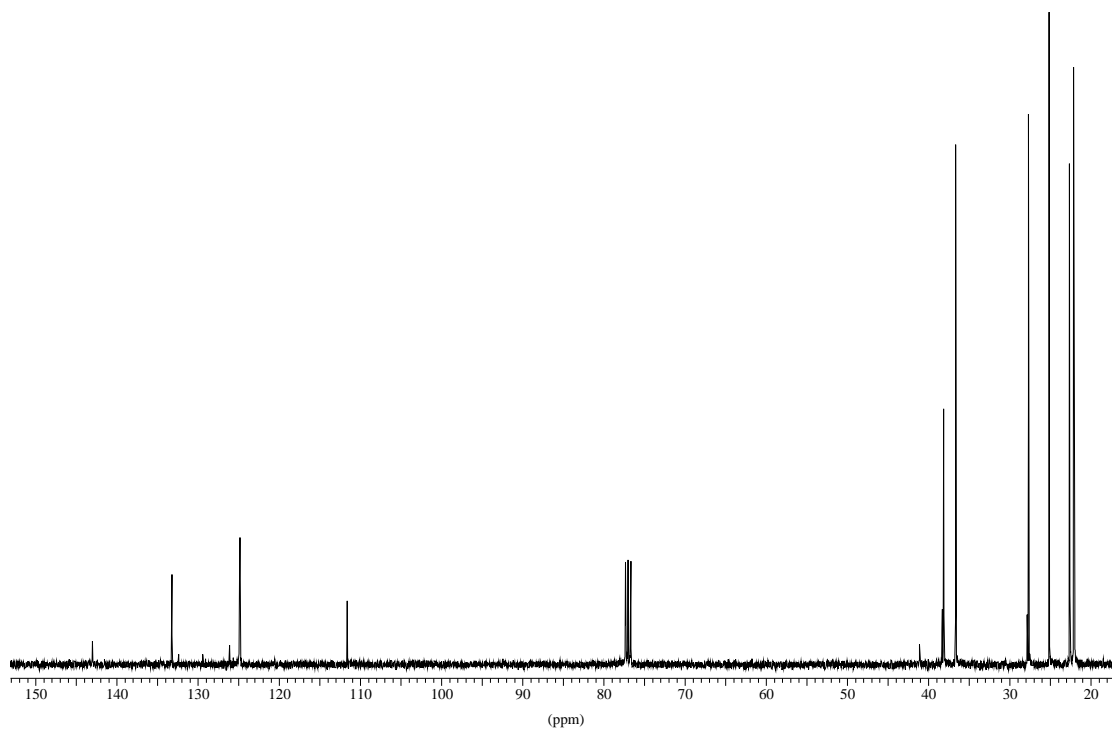

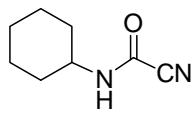

**8e**

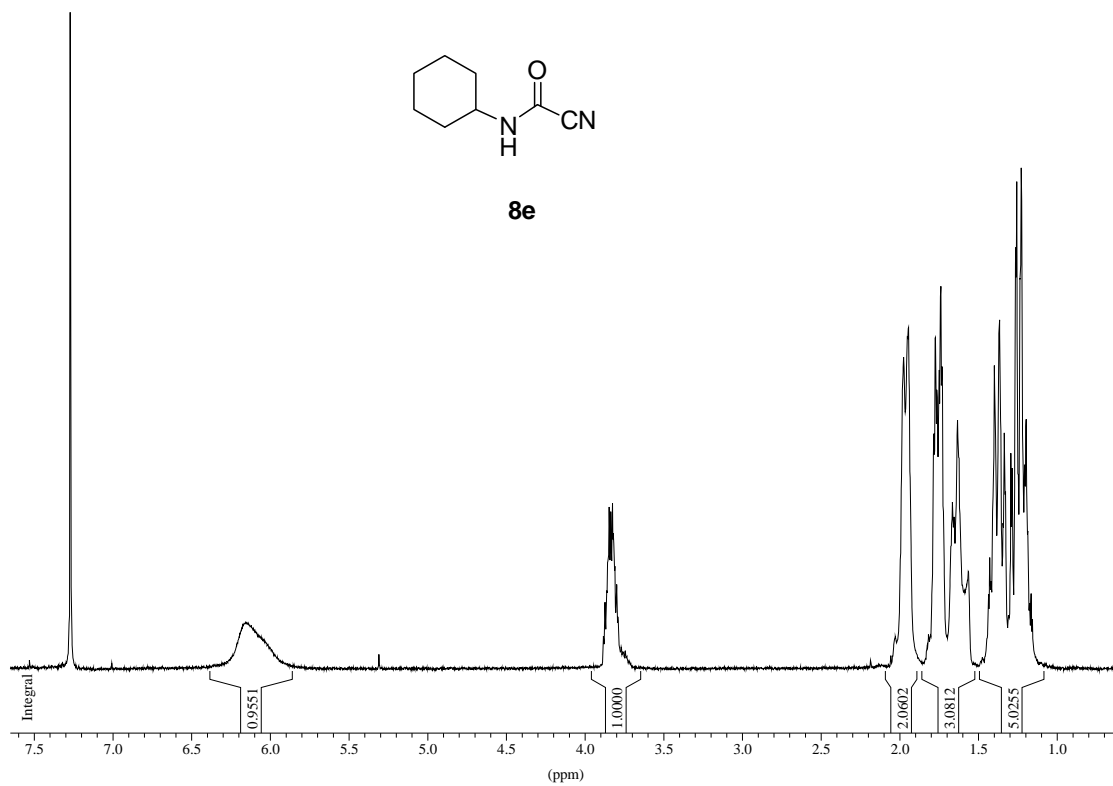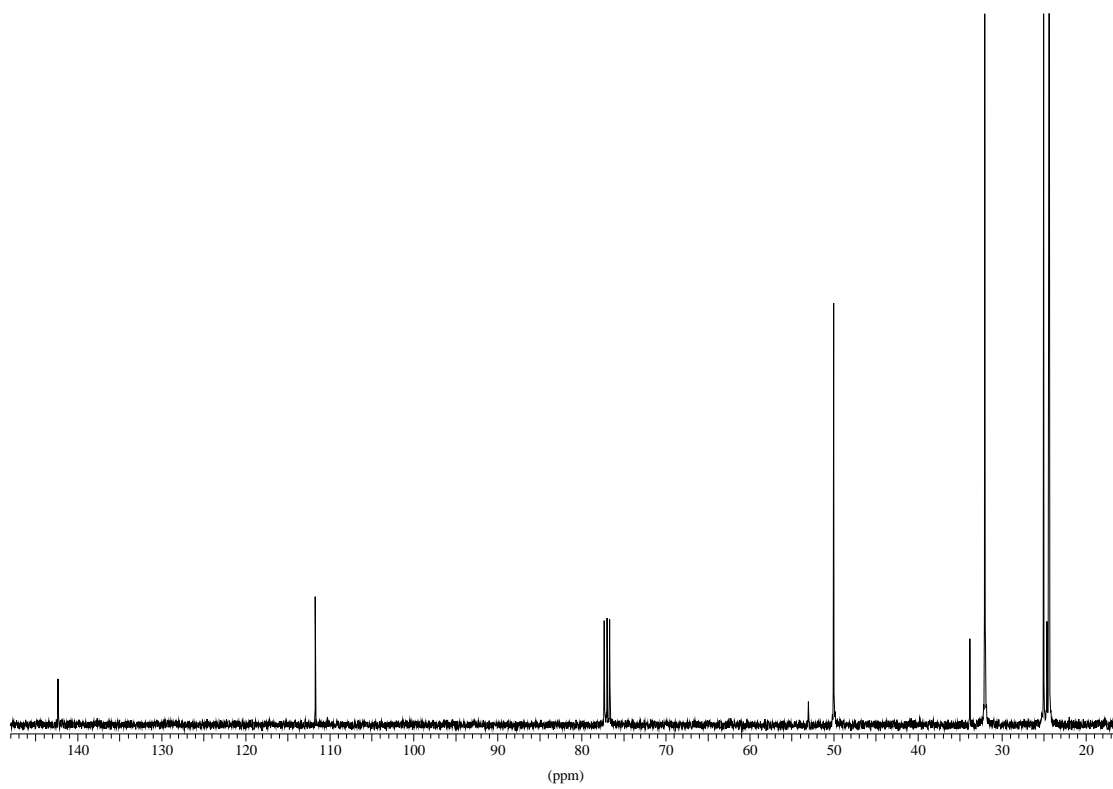



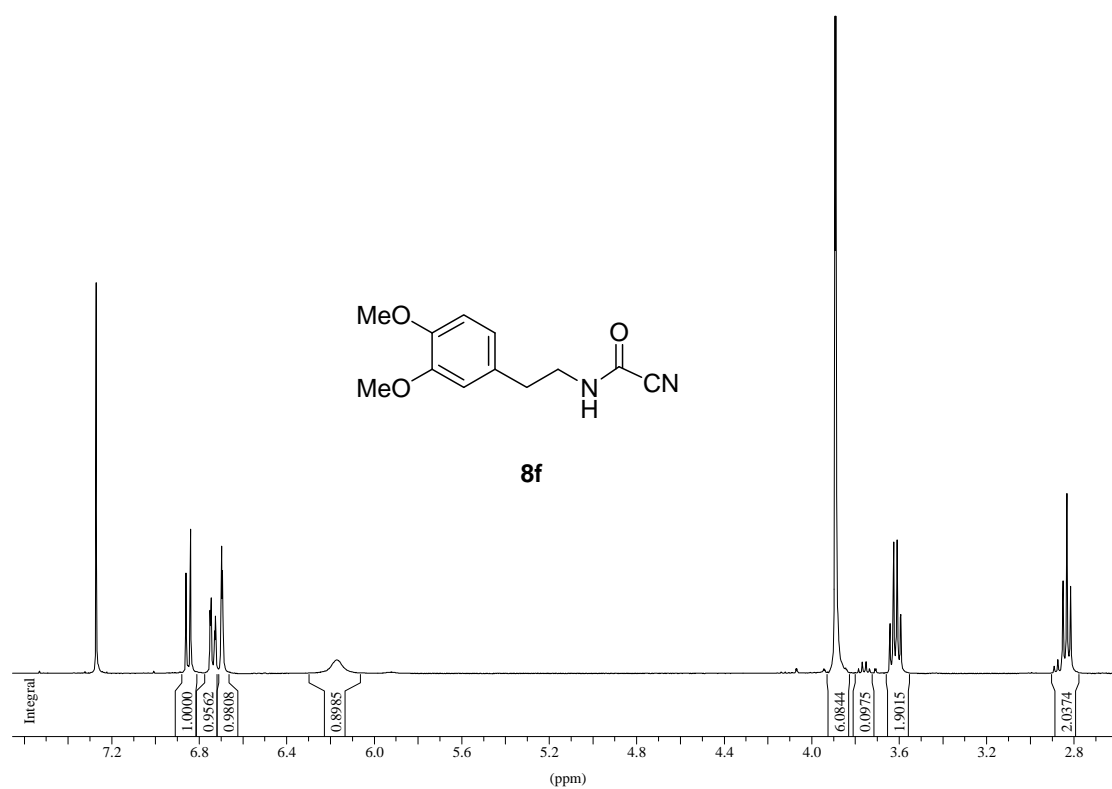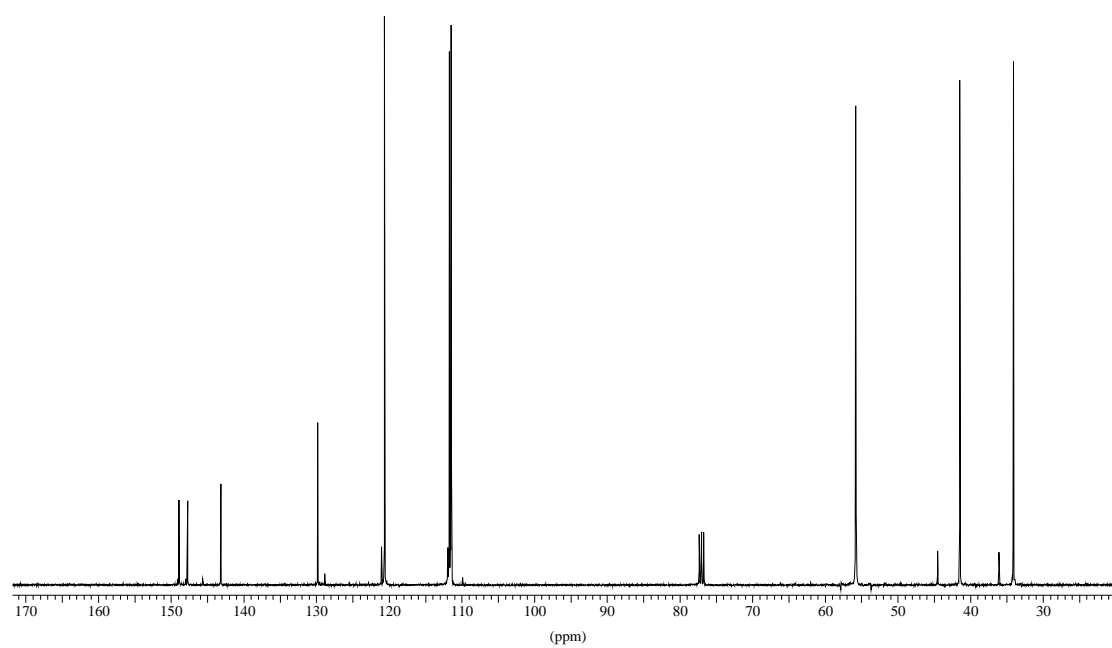

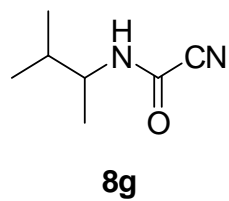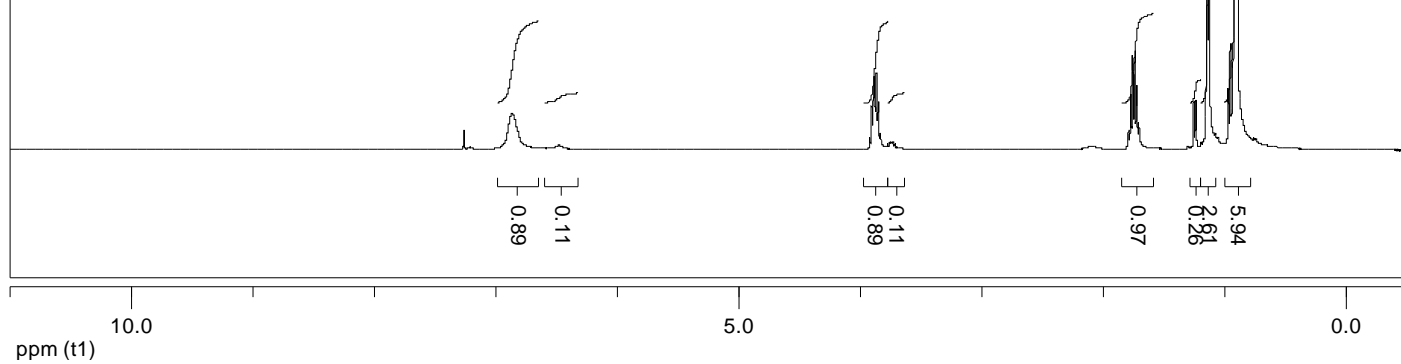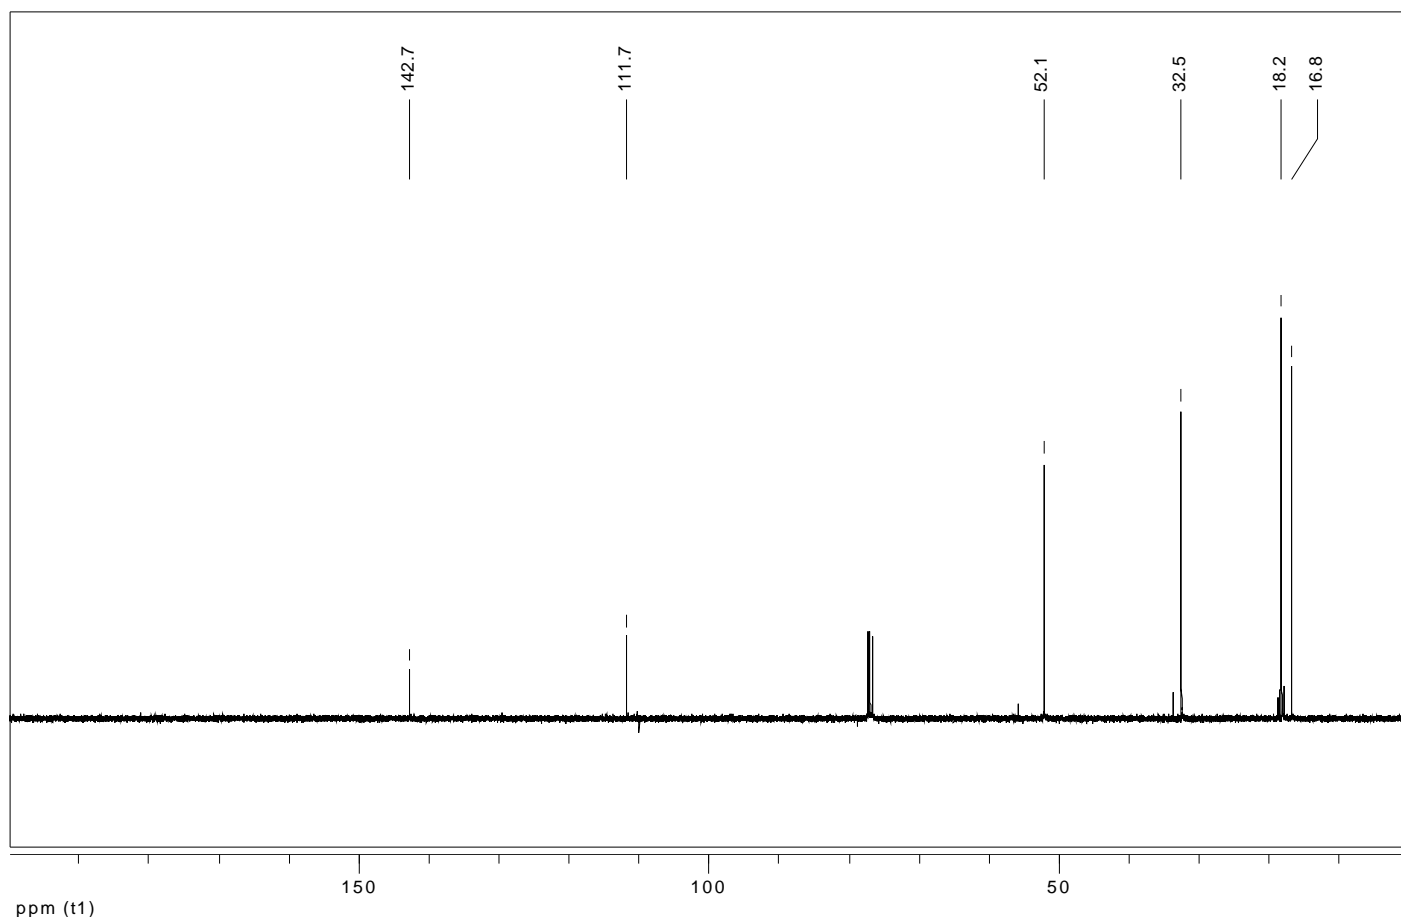

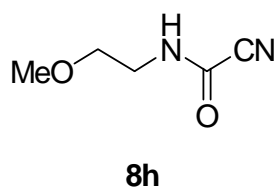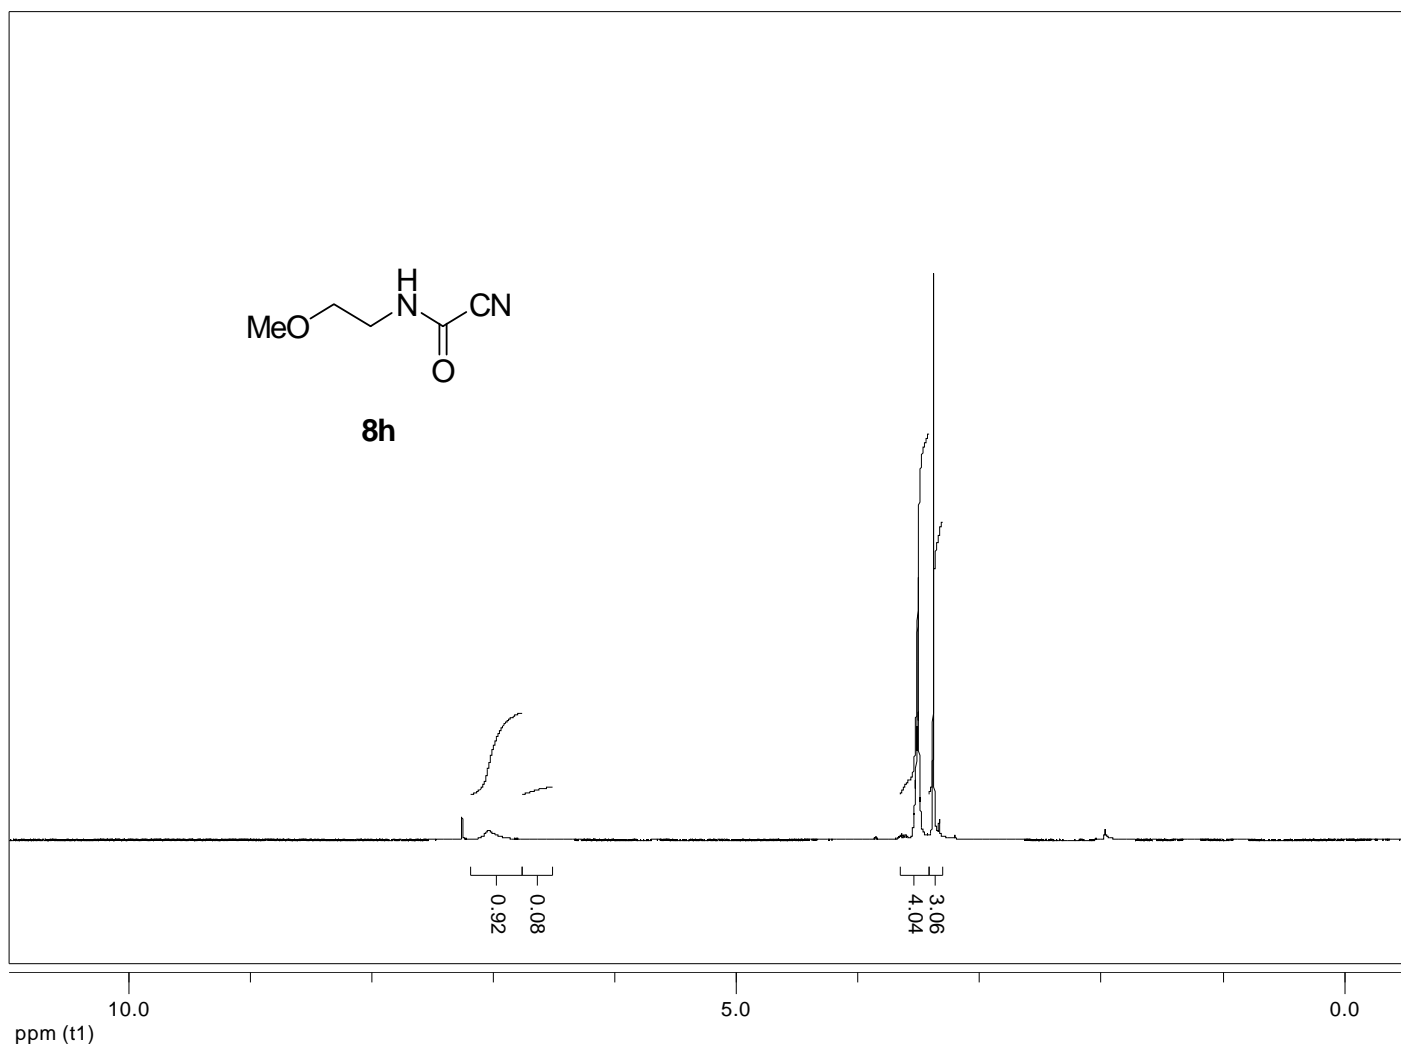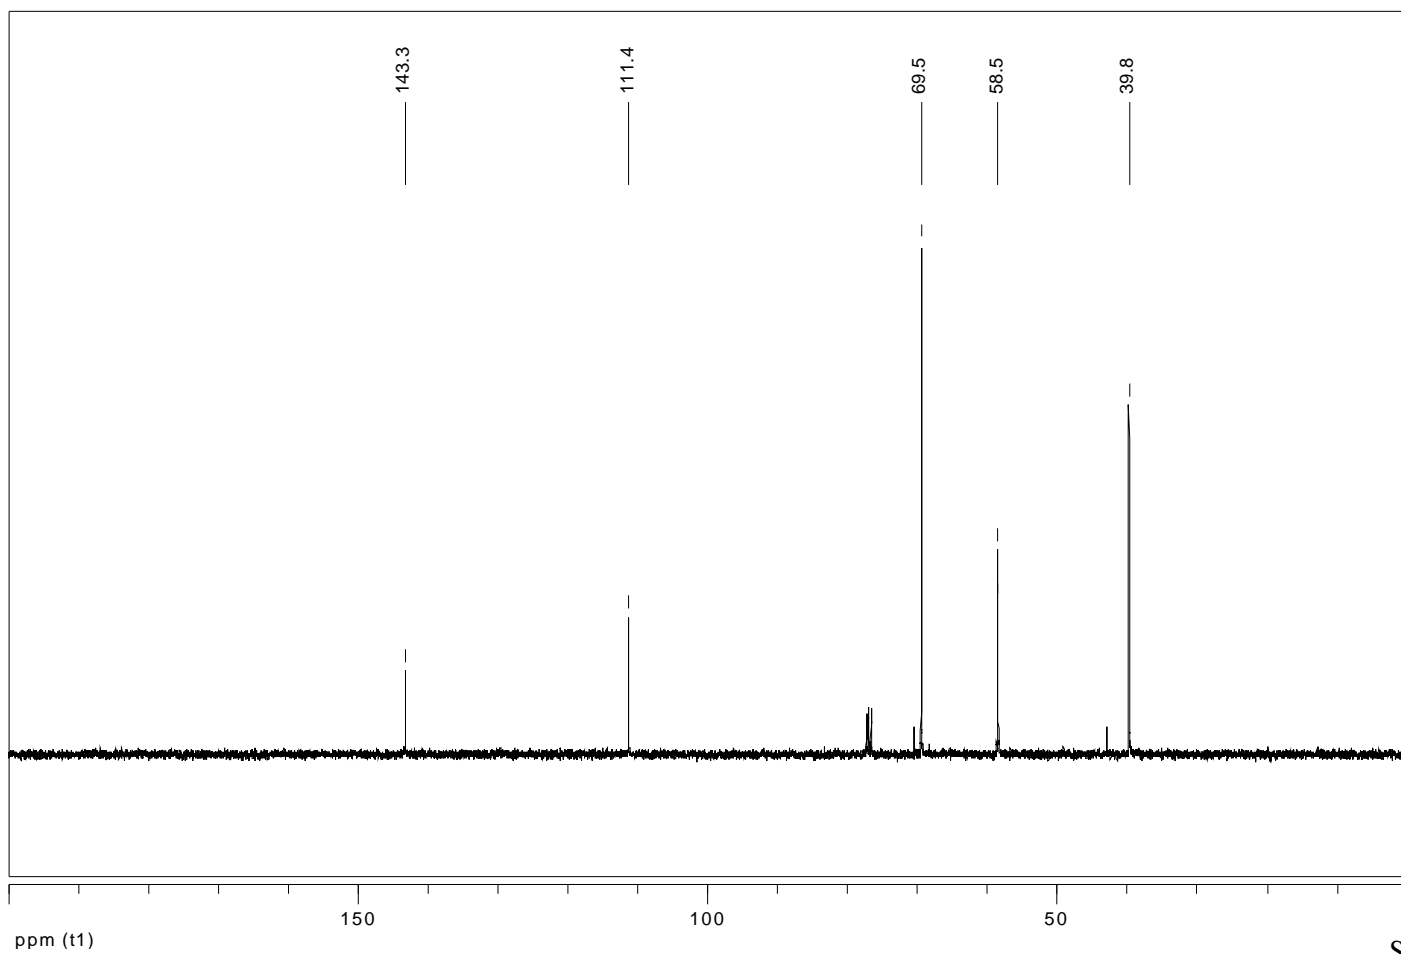

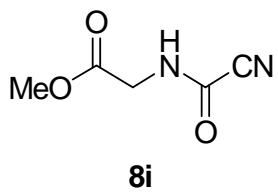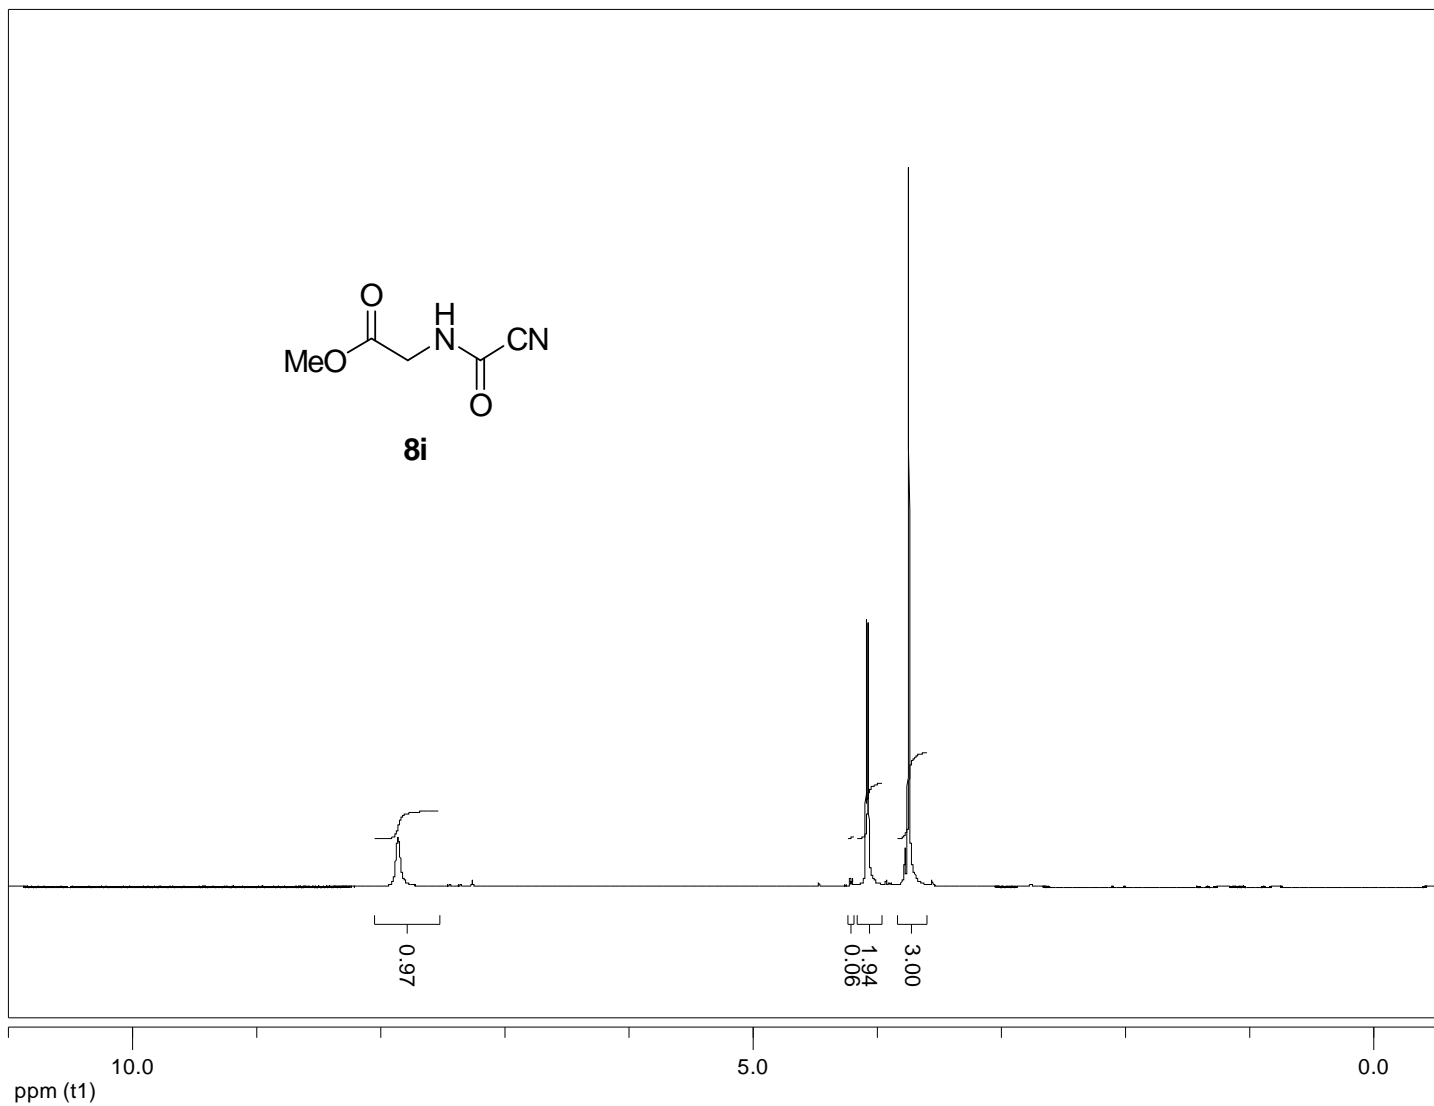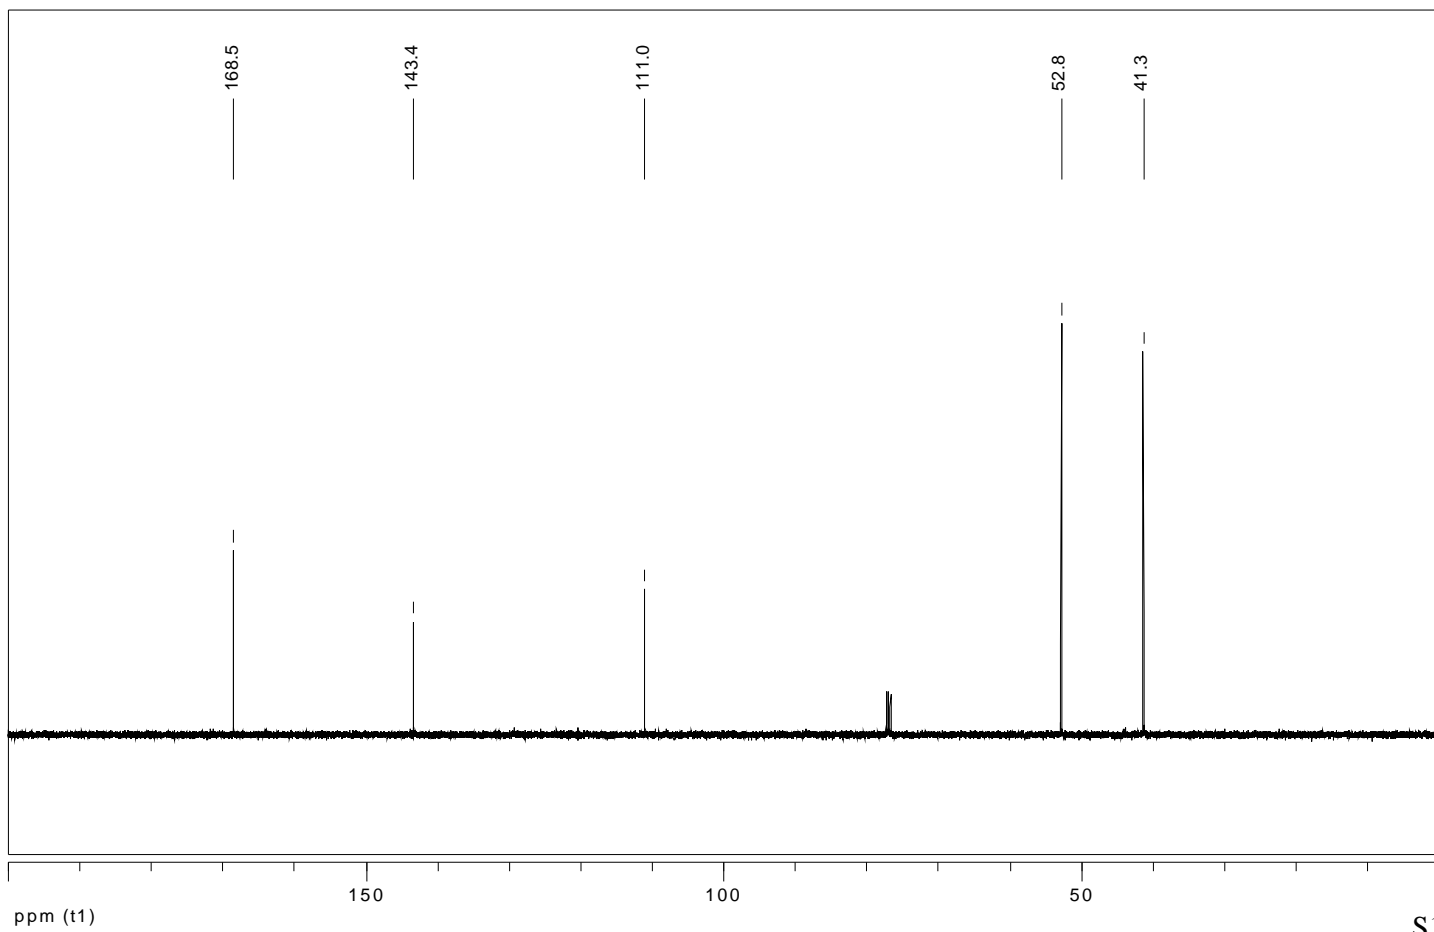

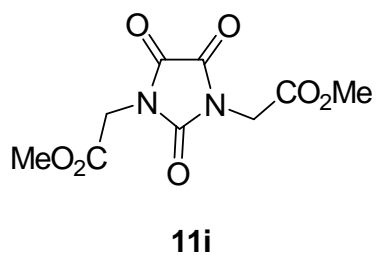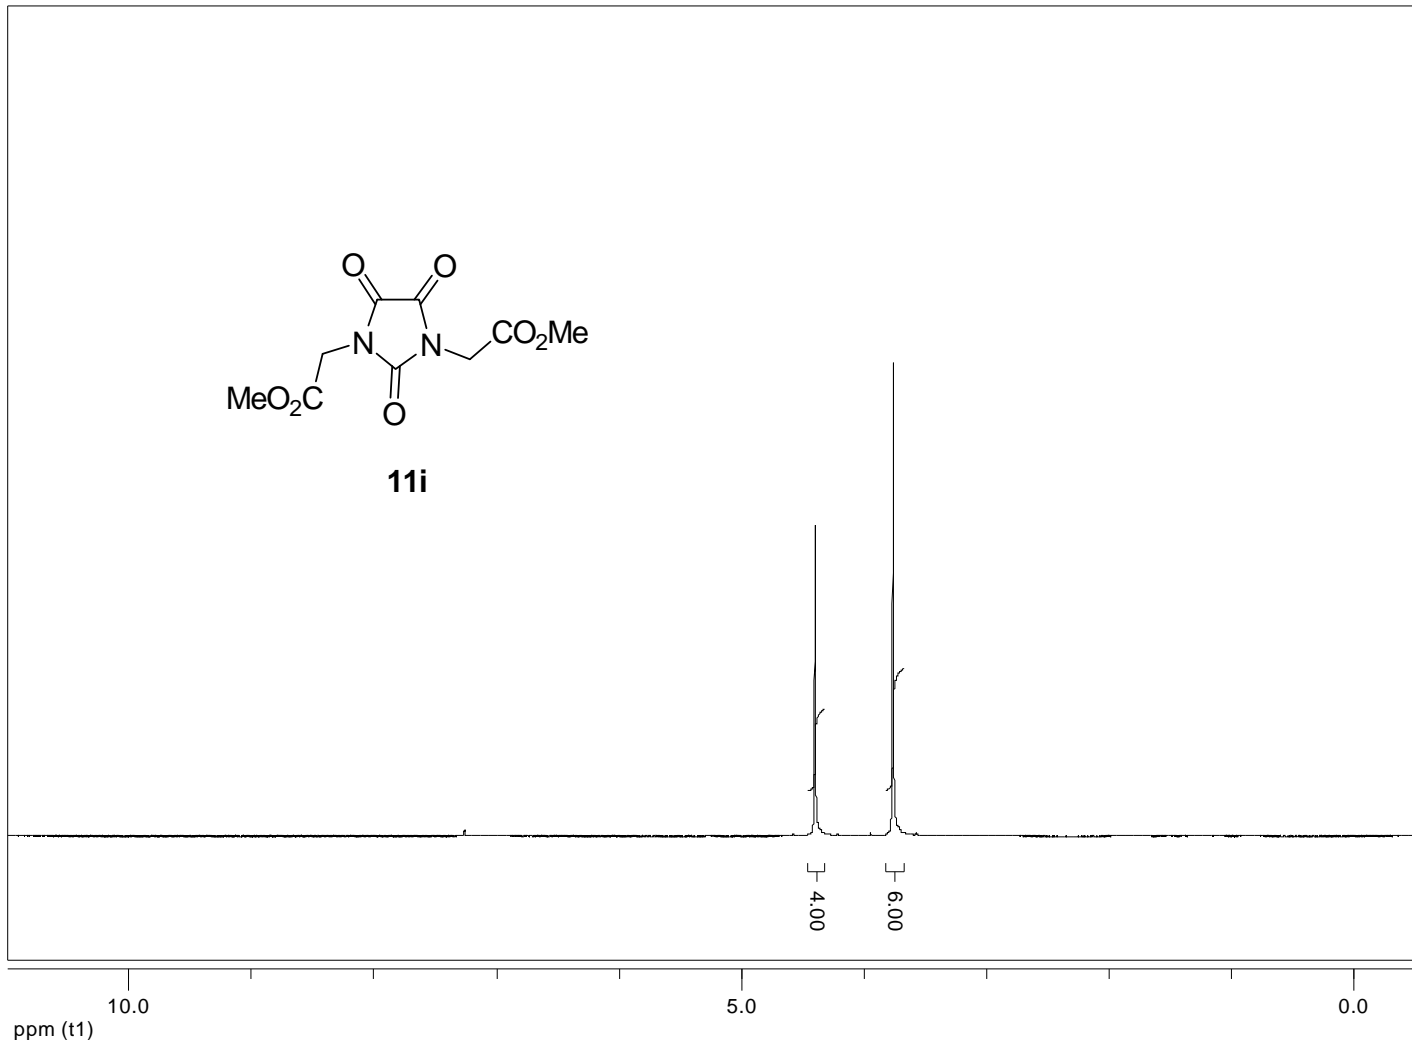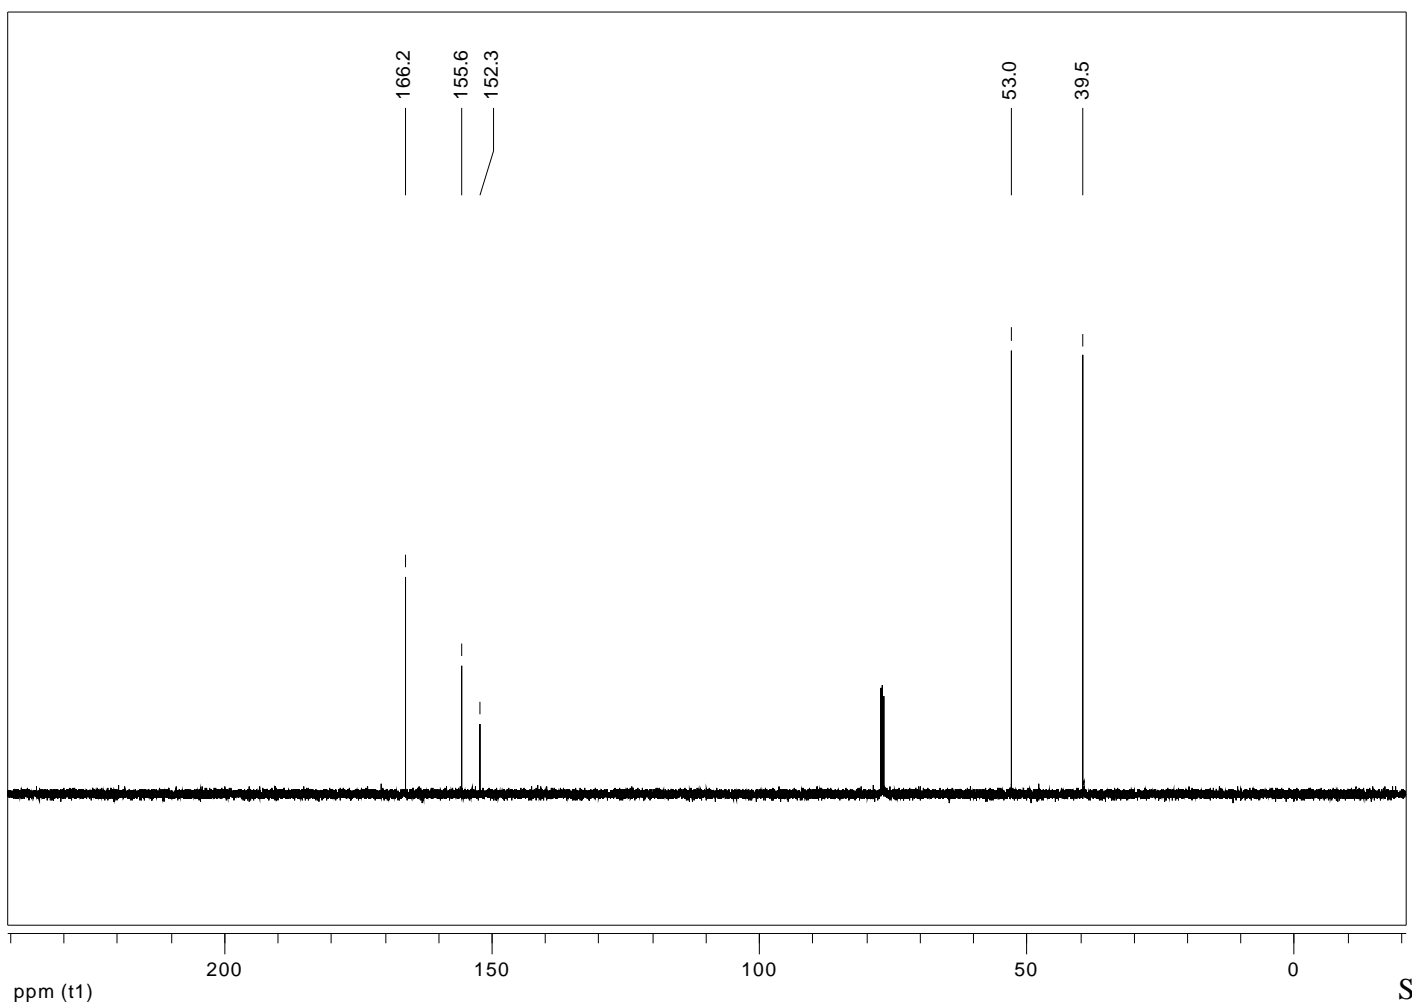

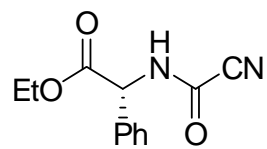

**8j**

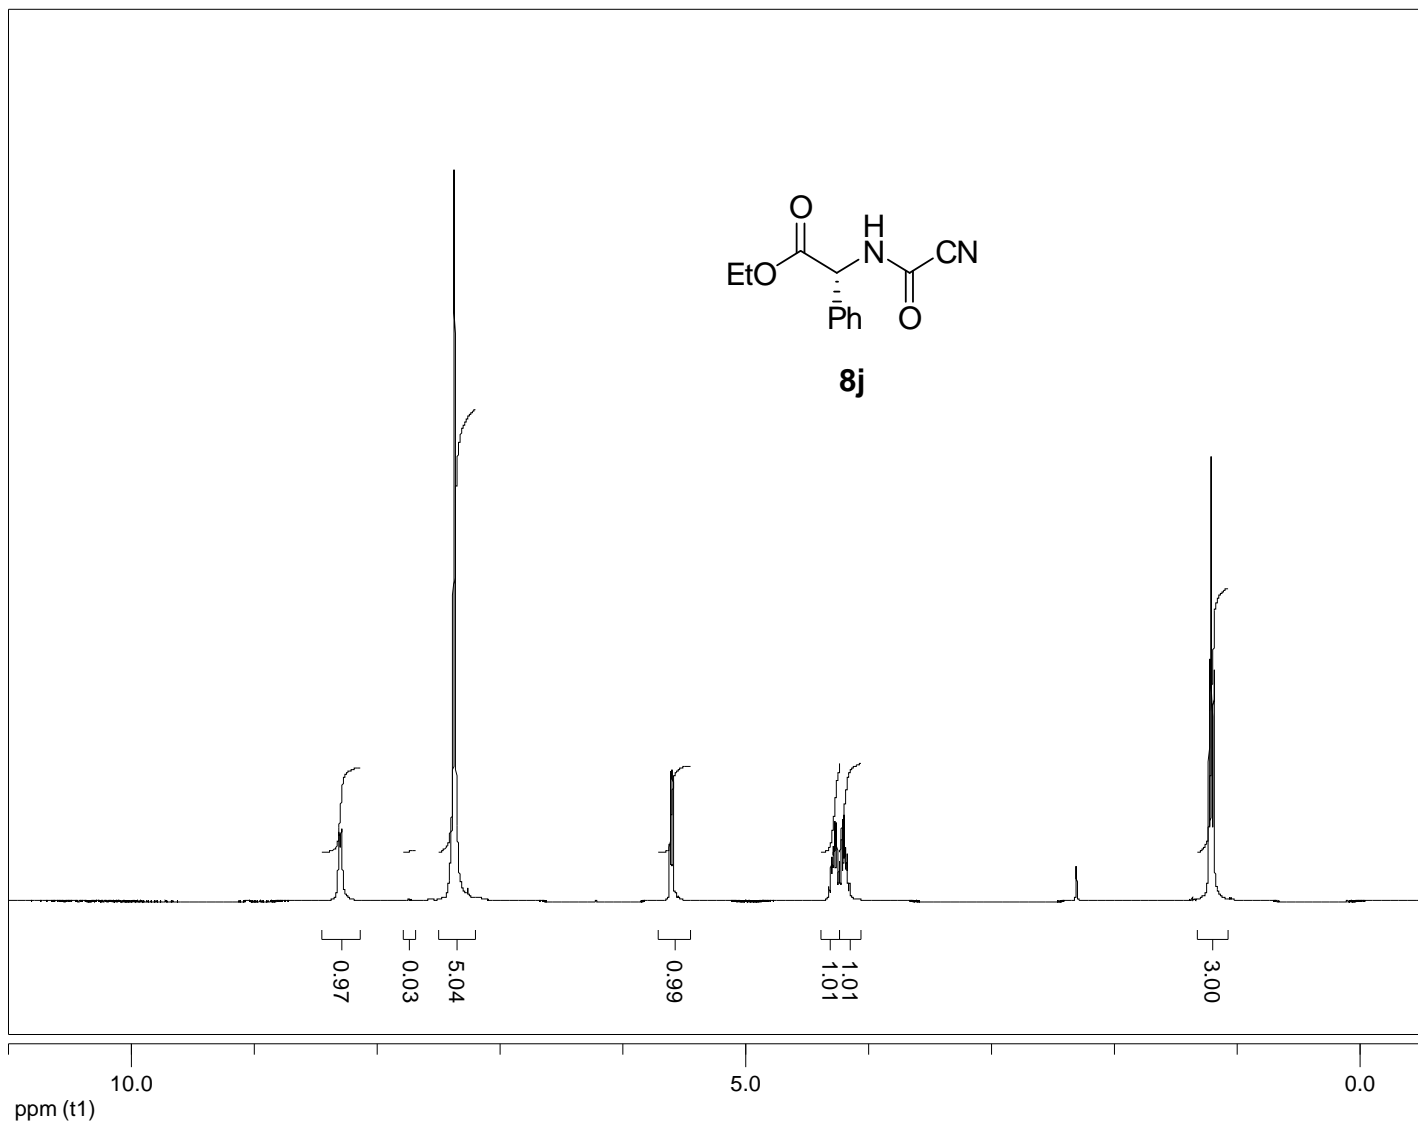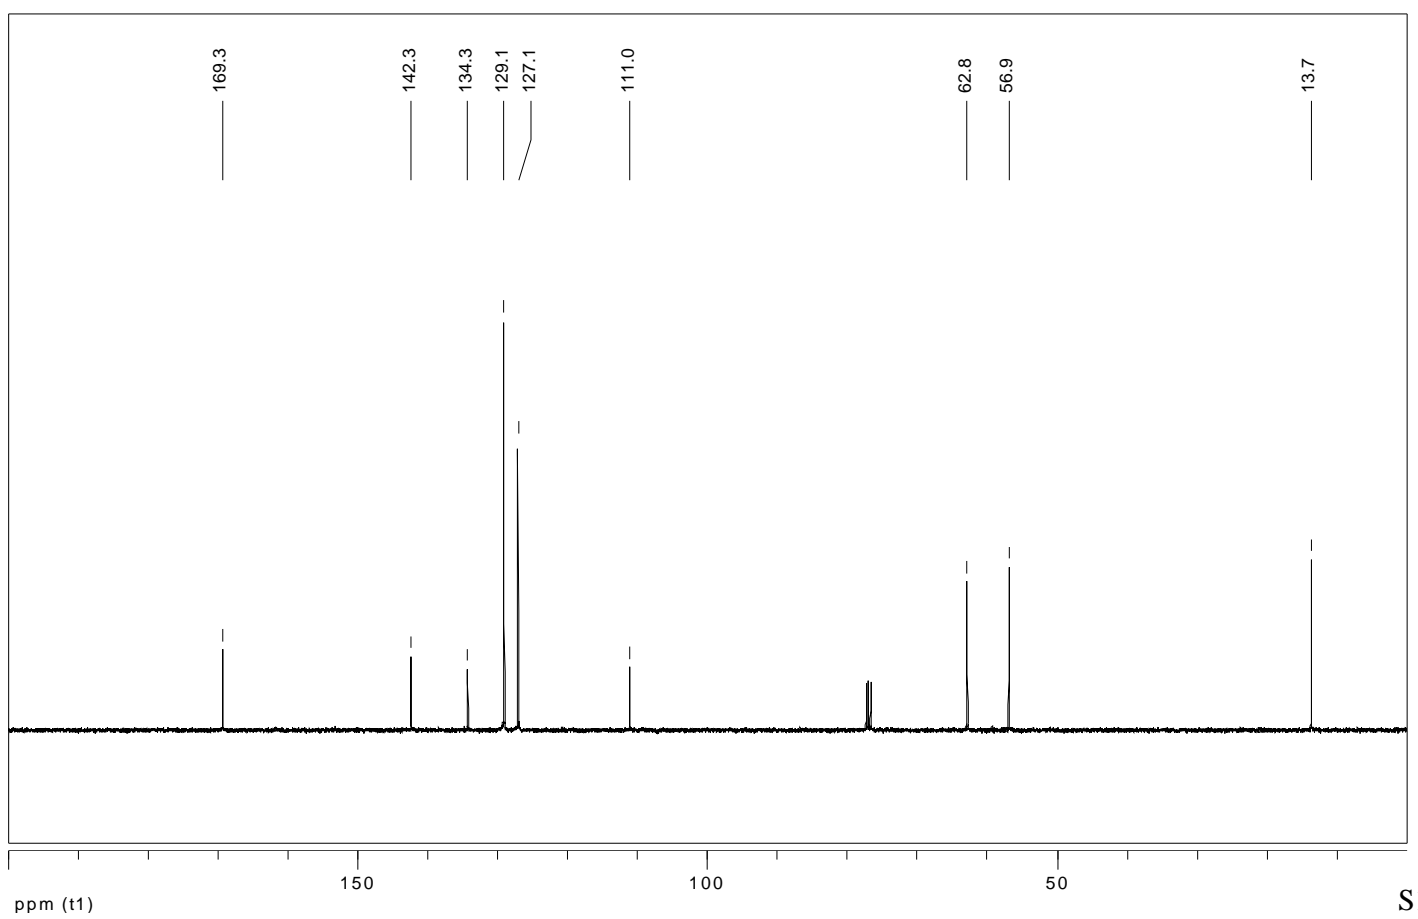

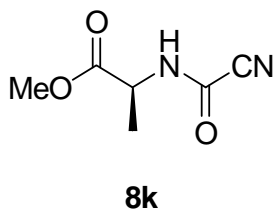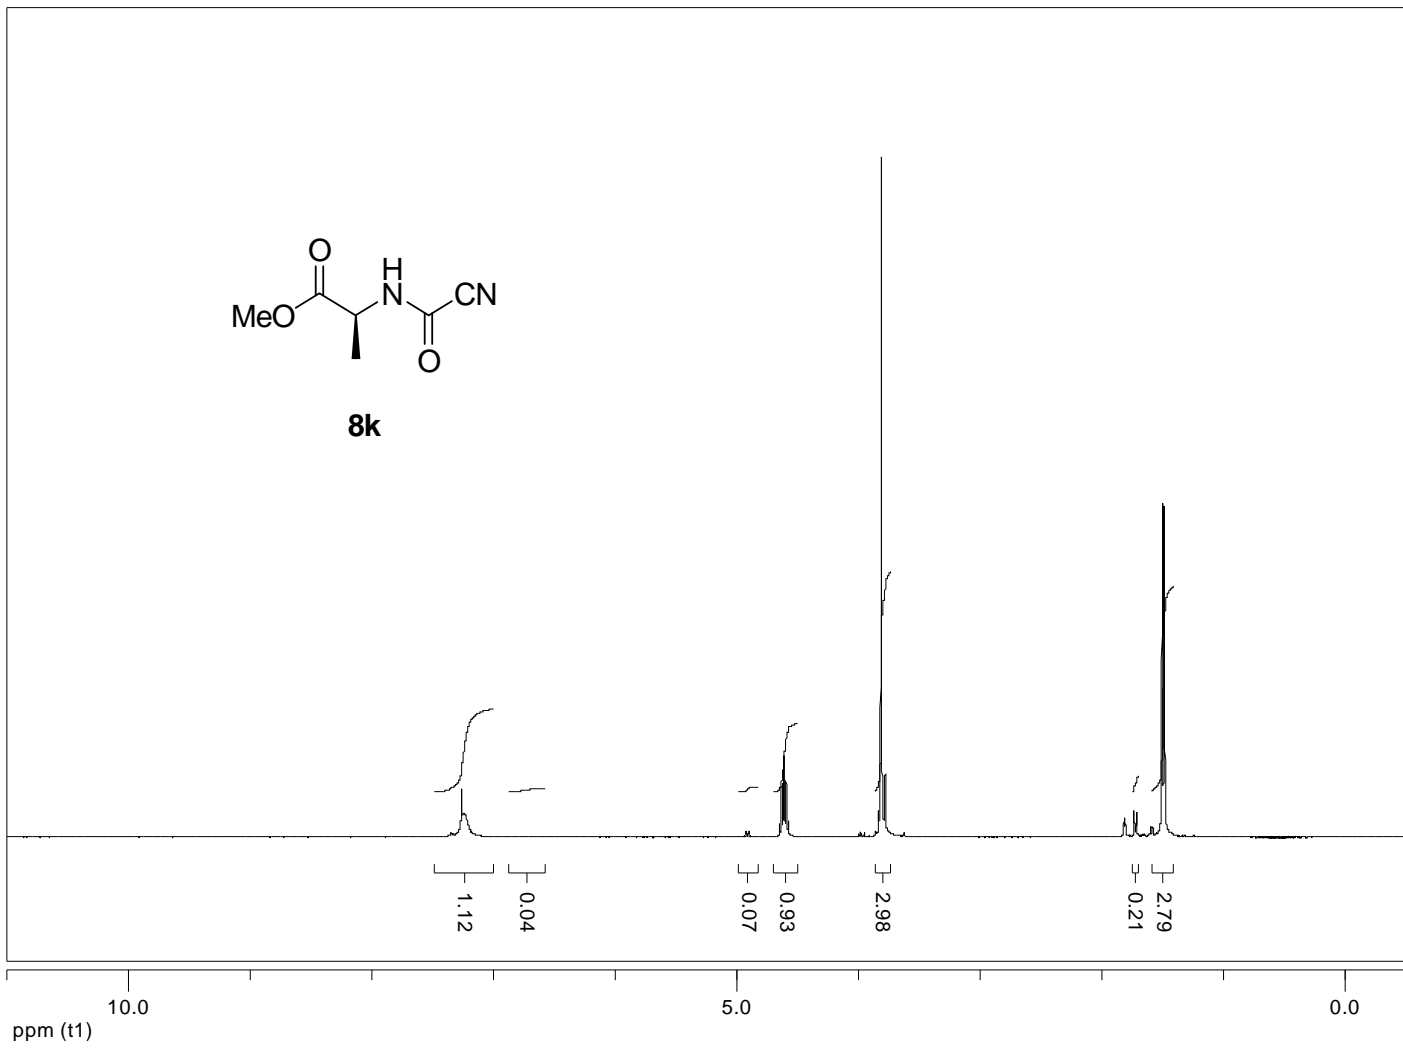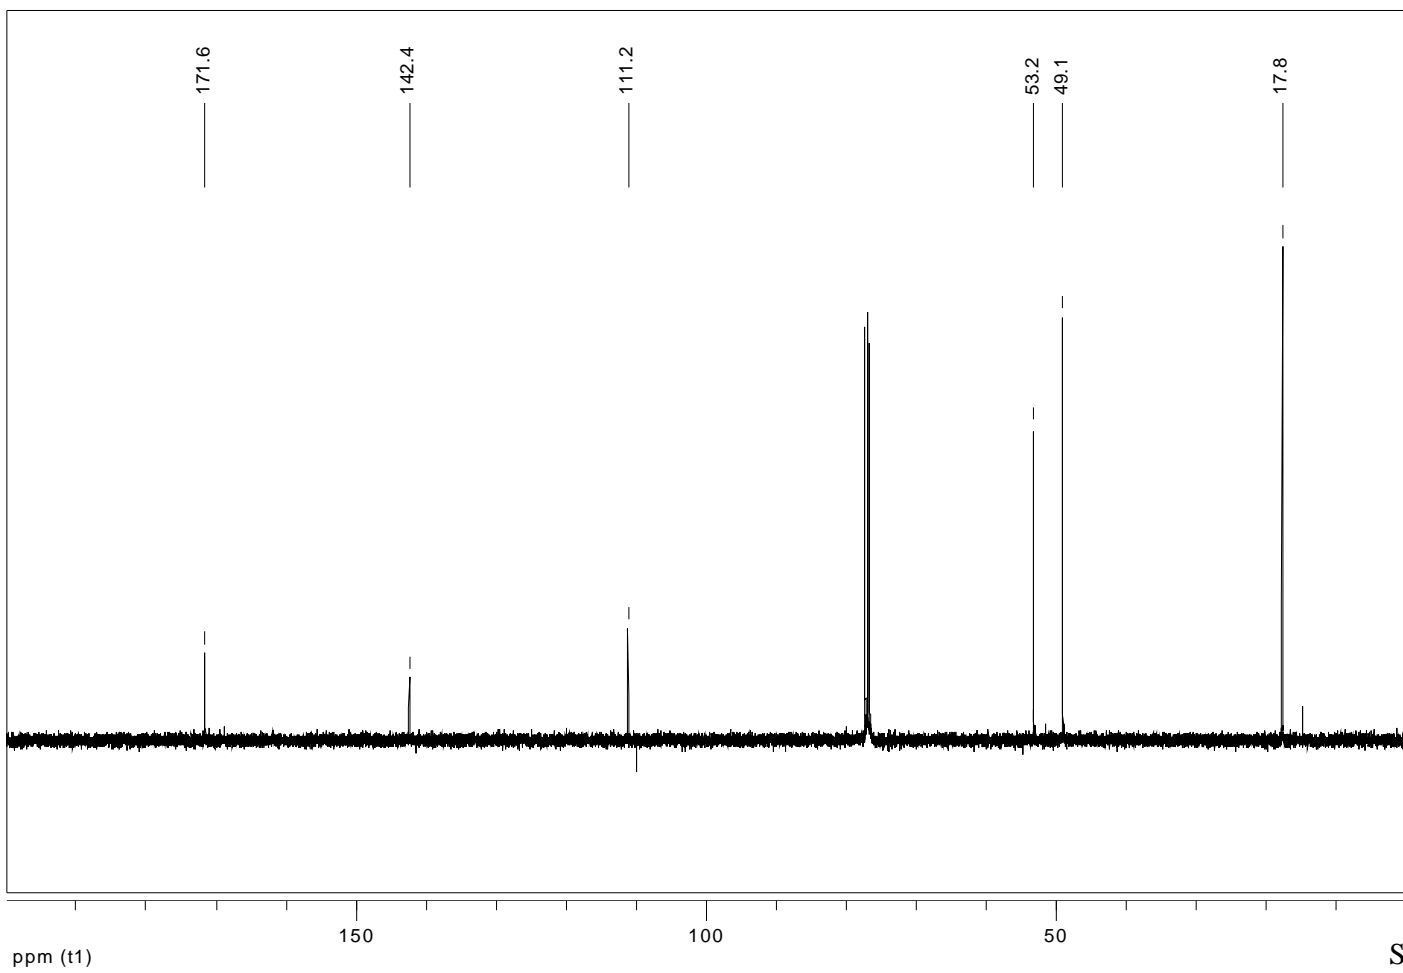

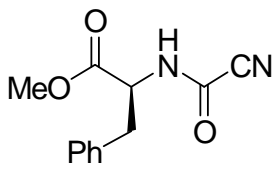

8l

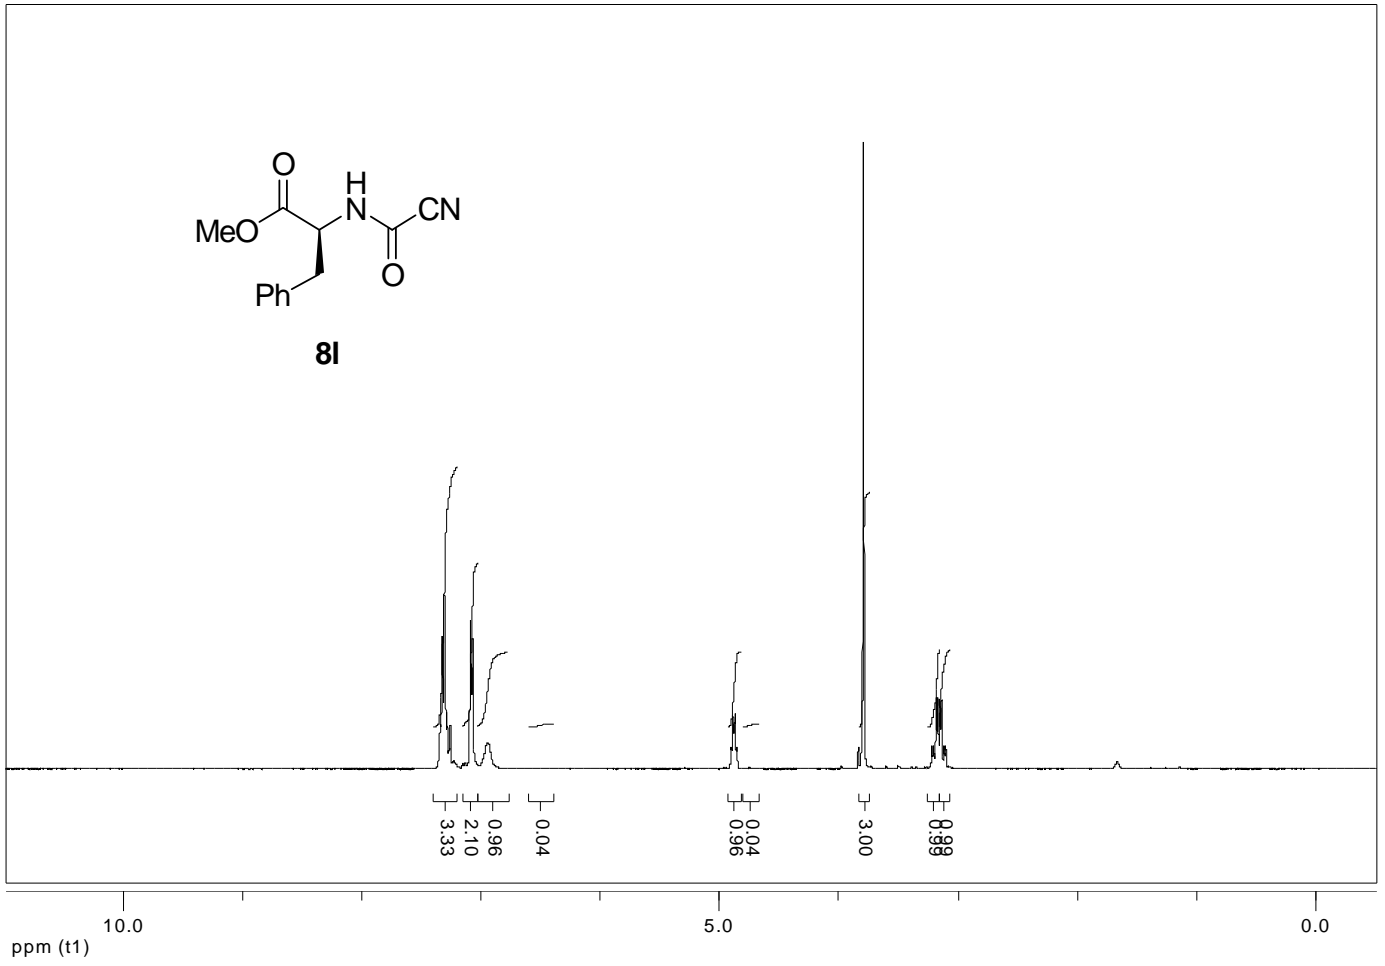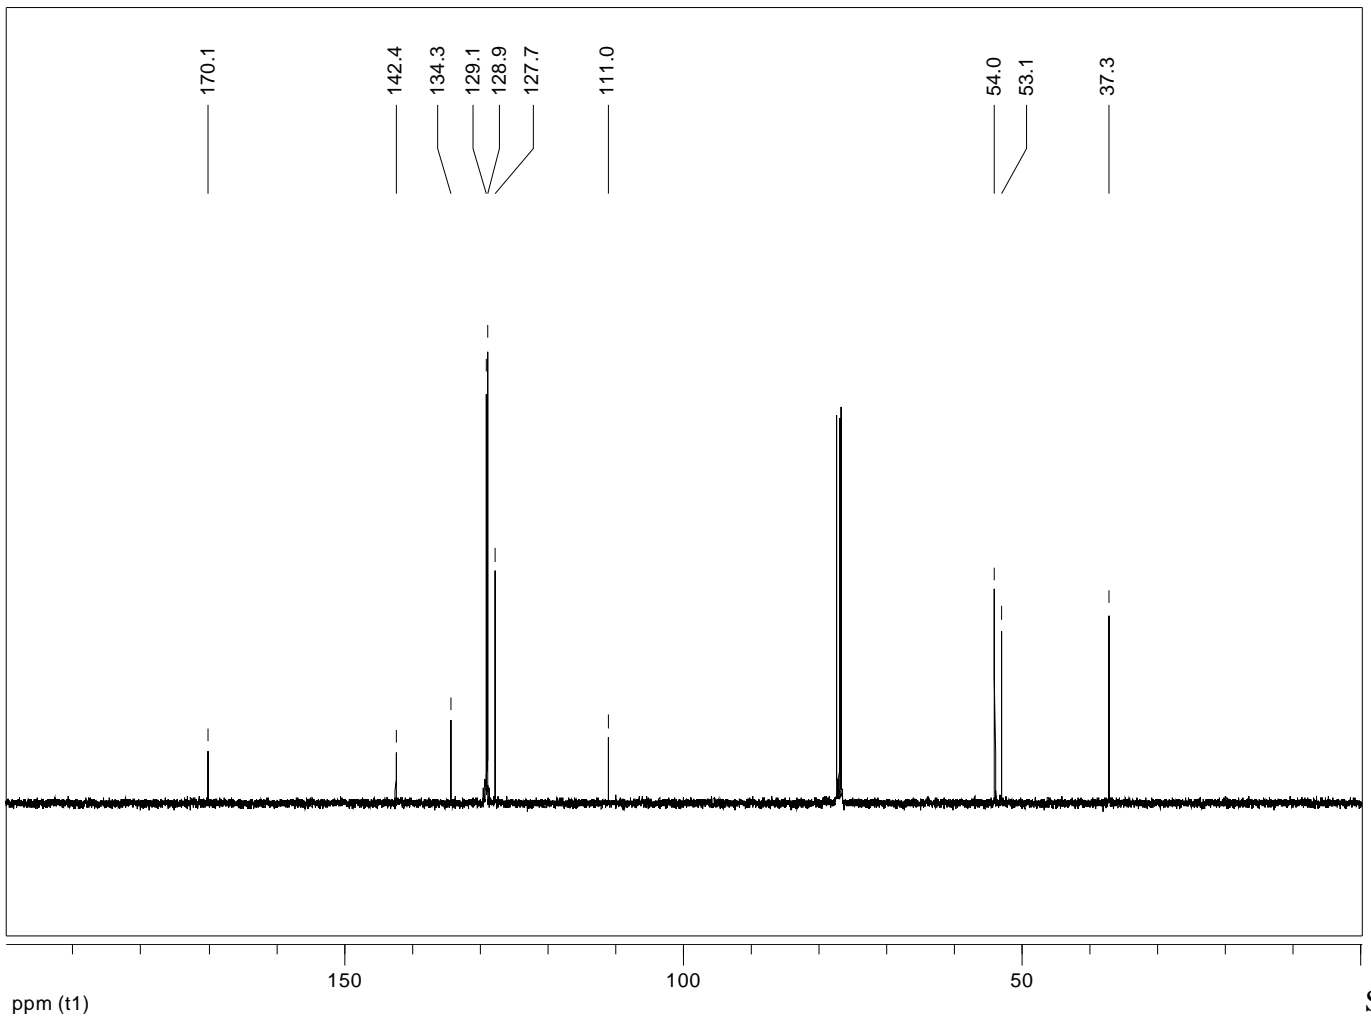



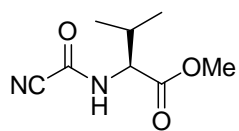

8m

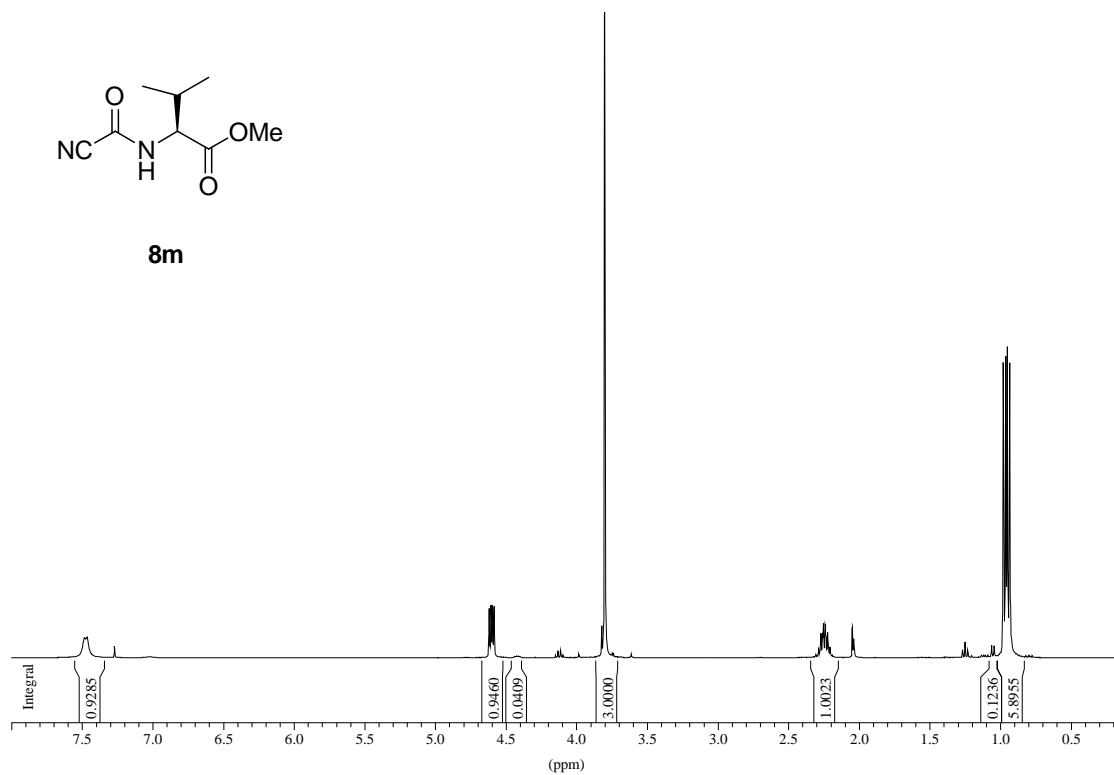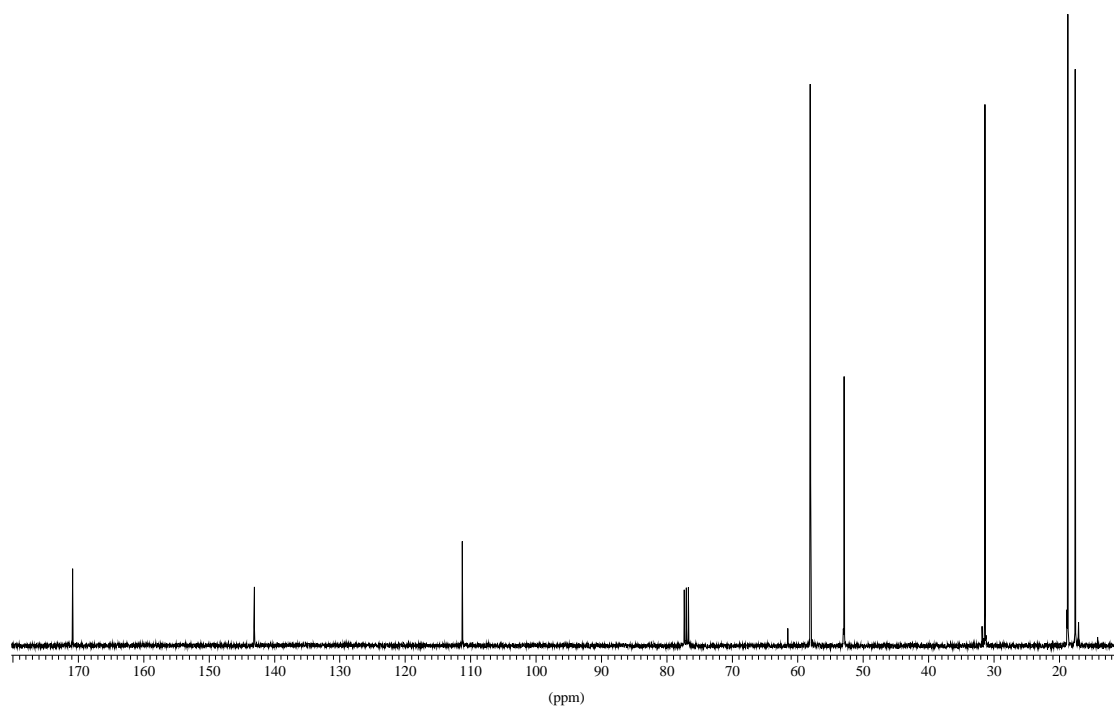

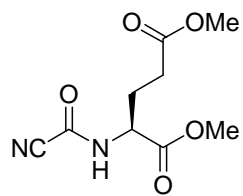

**8o**

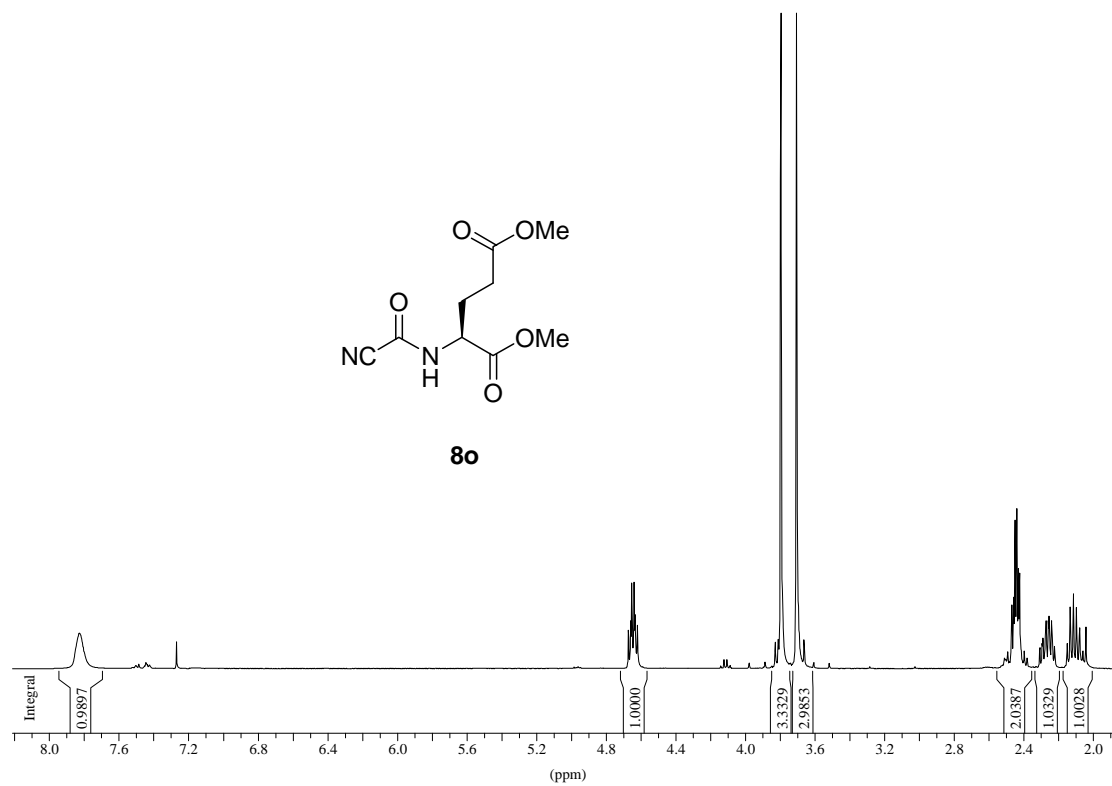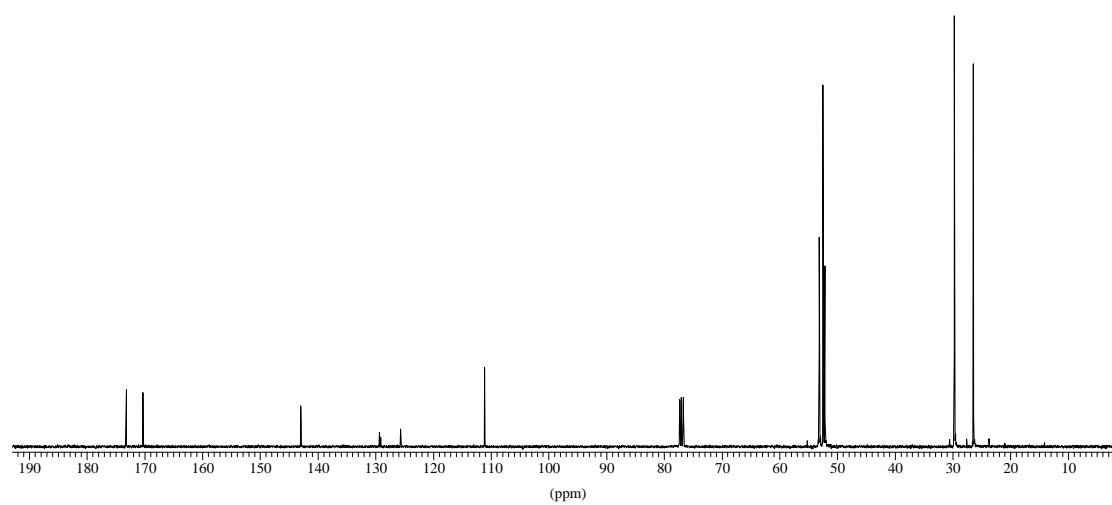

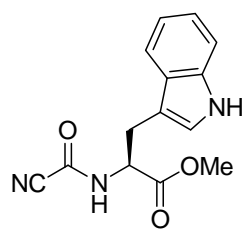

**8p**

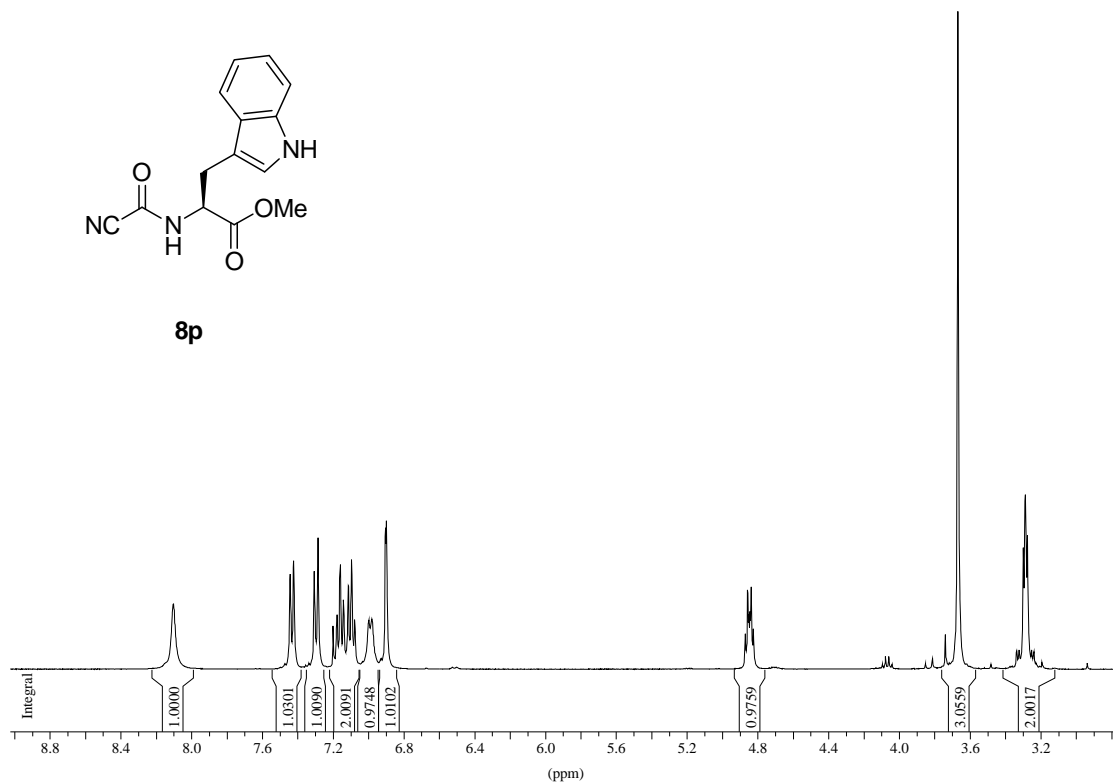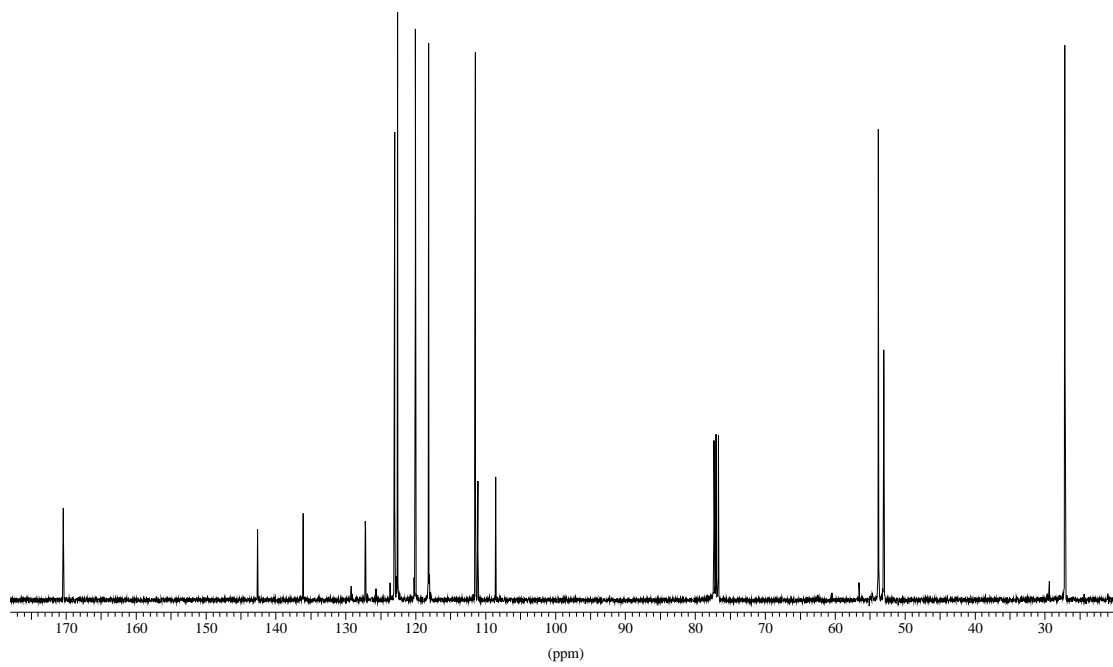

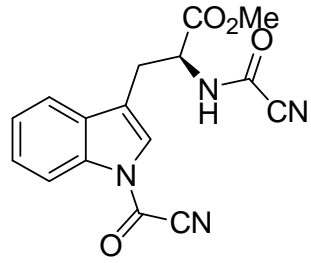

**13**  
(acetone-d<sub>6</sub>)

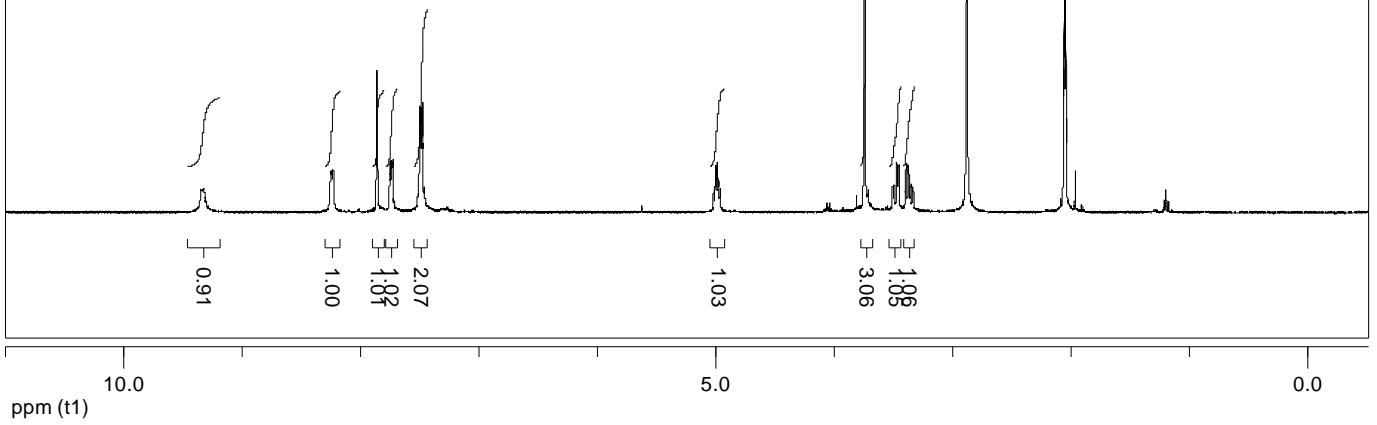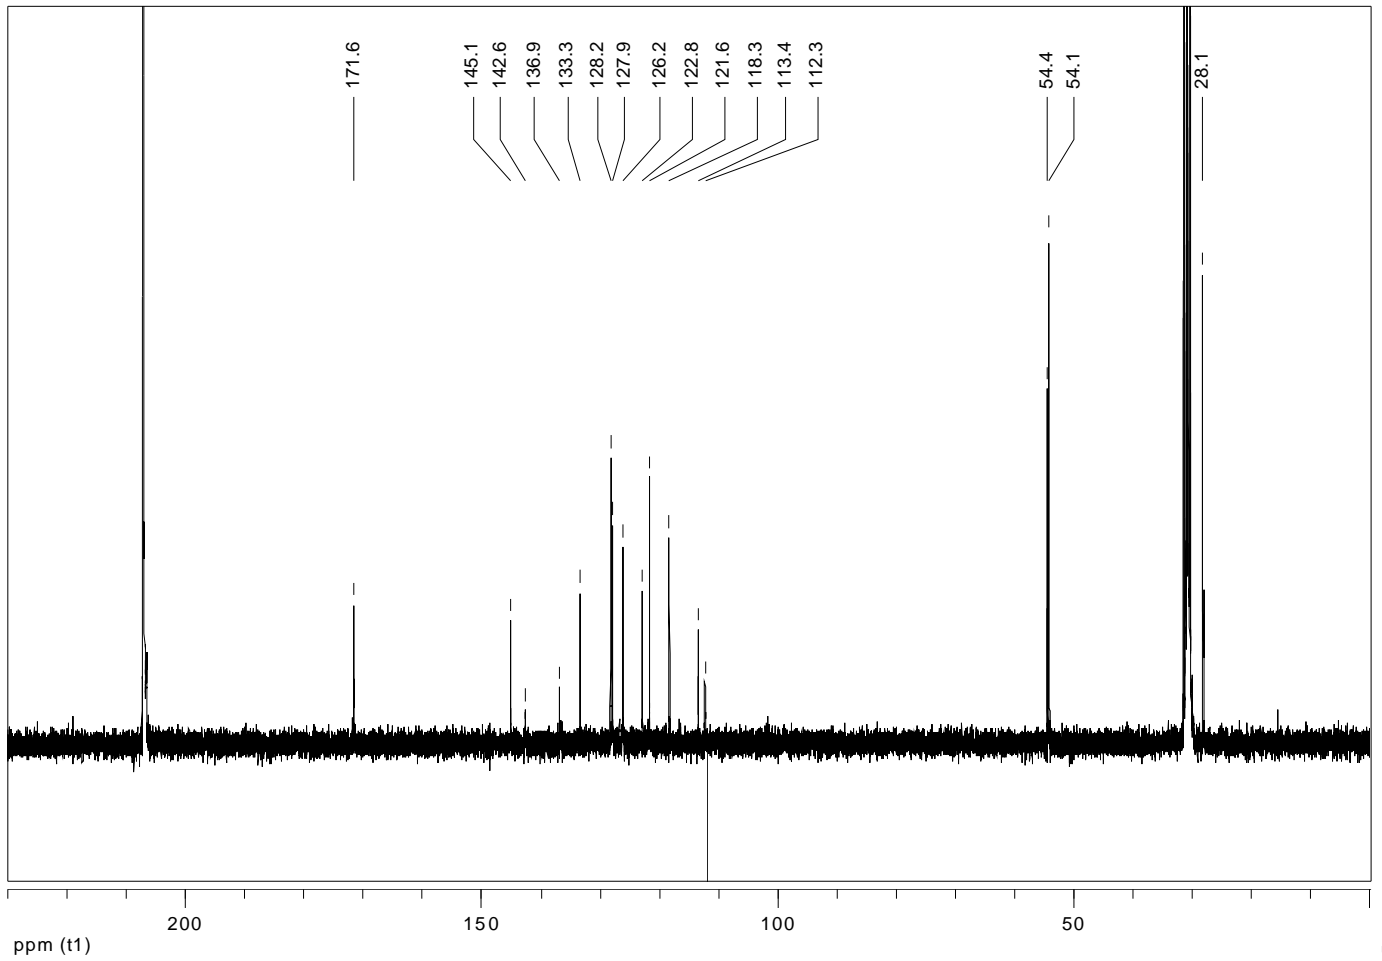

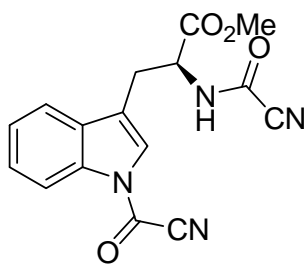

**13**

(DMSO-d<sub>6</sub>)

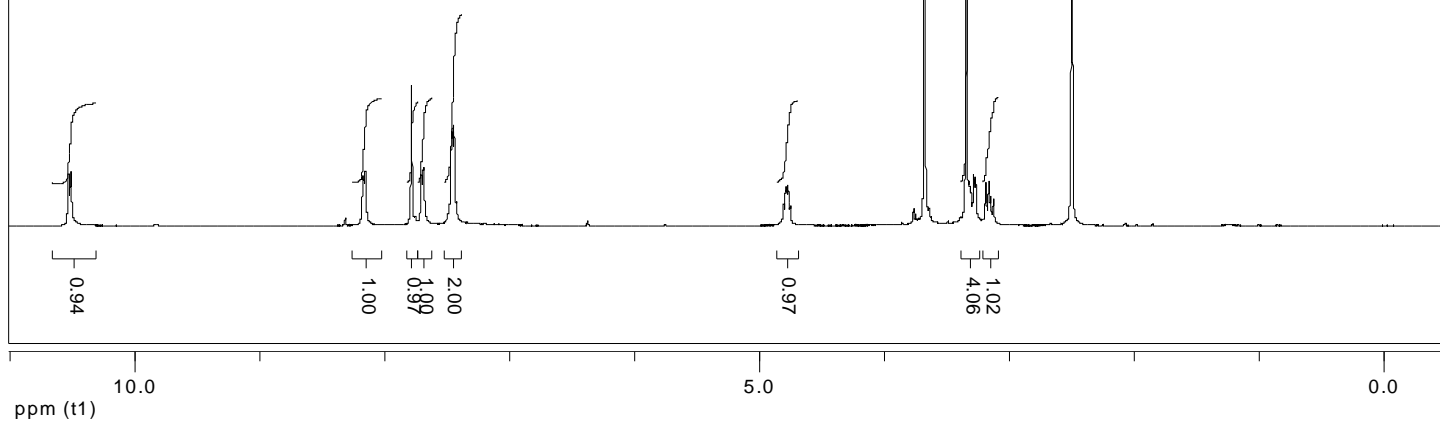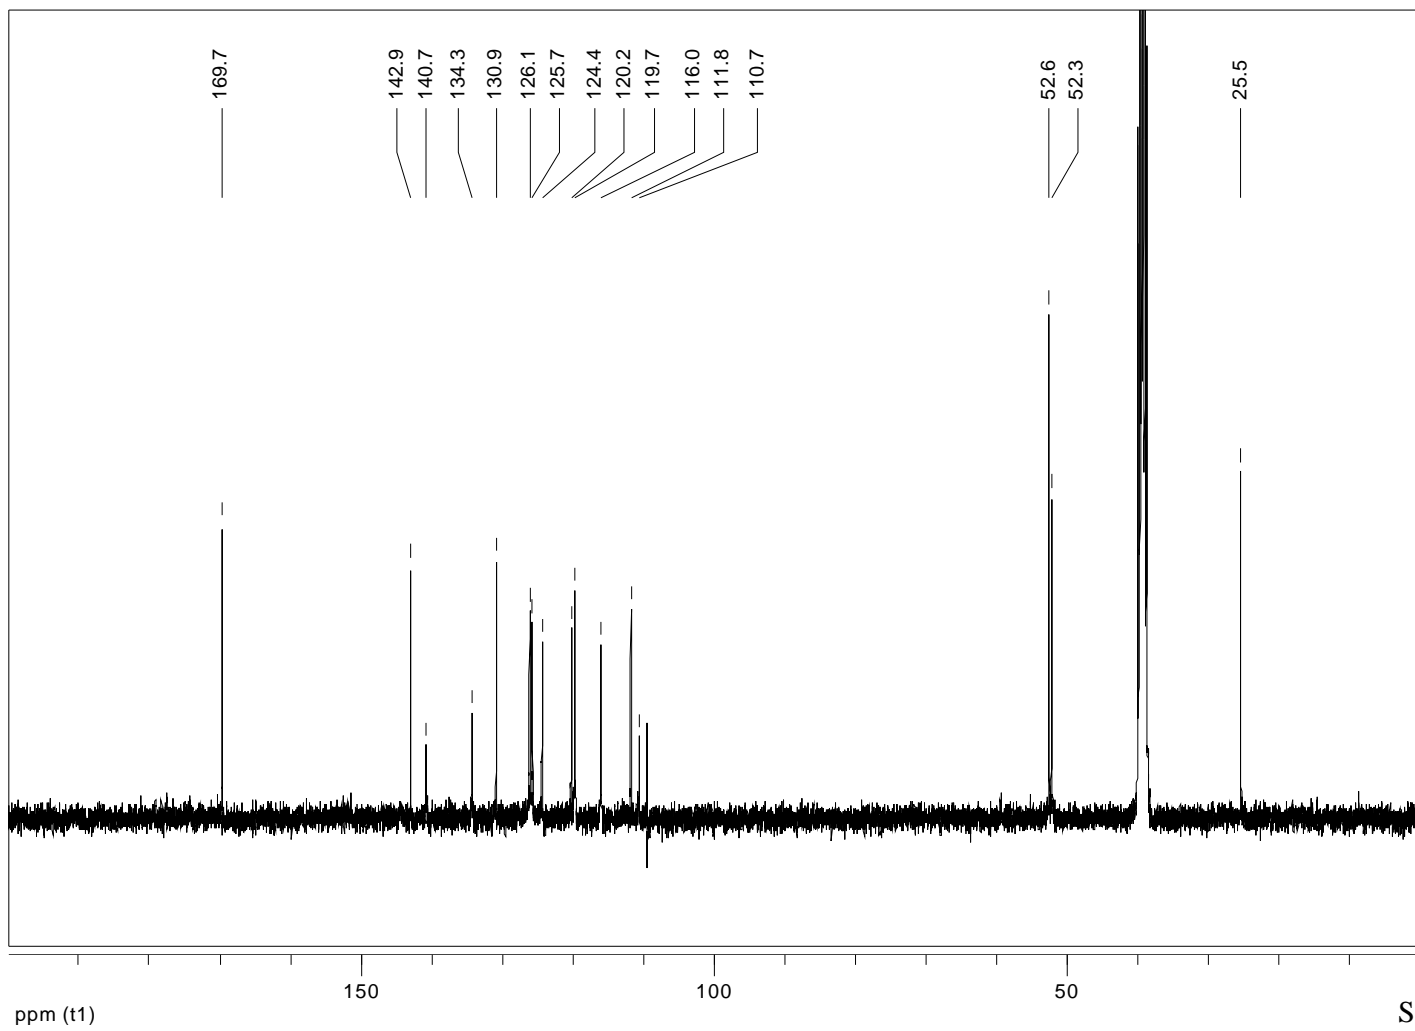

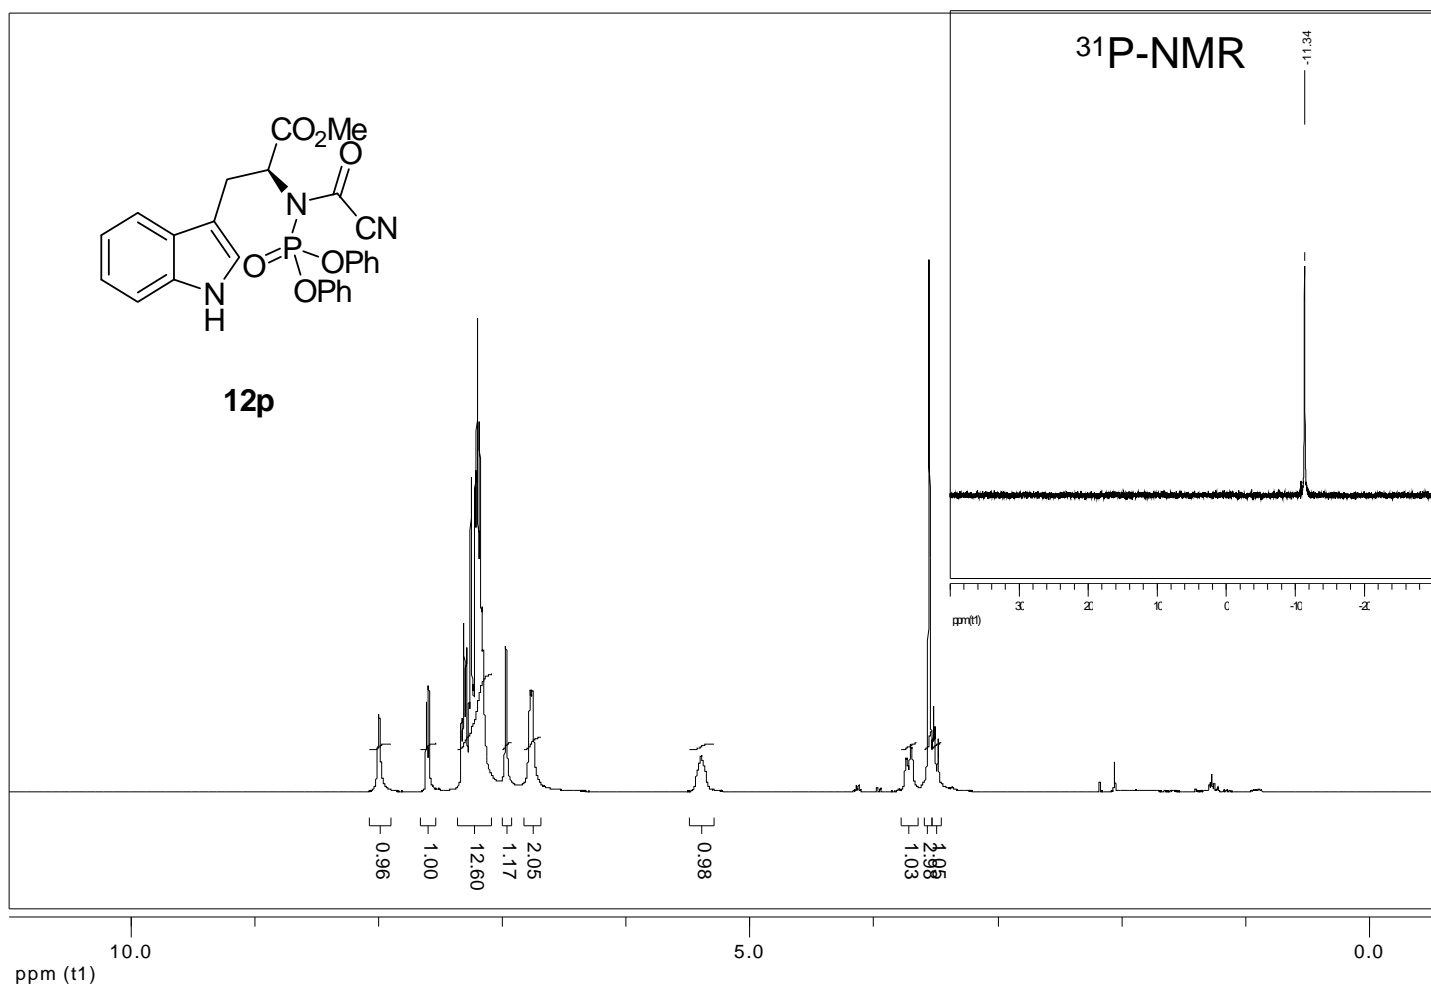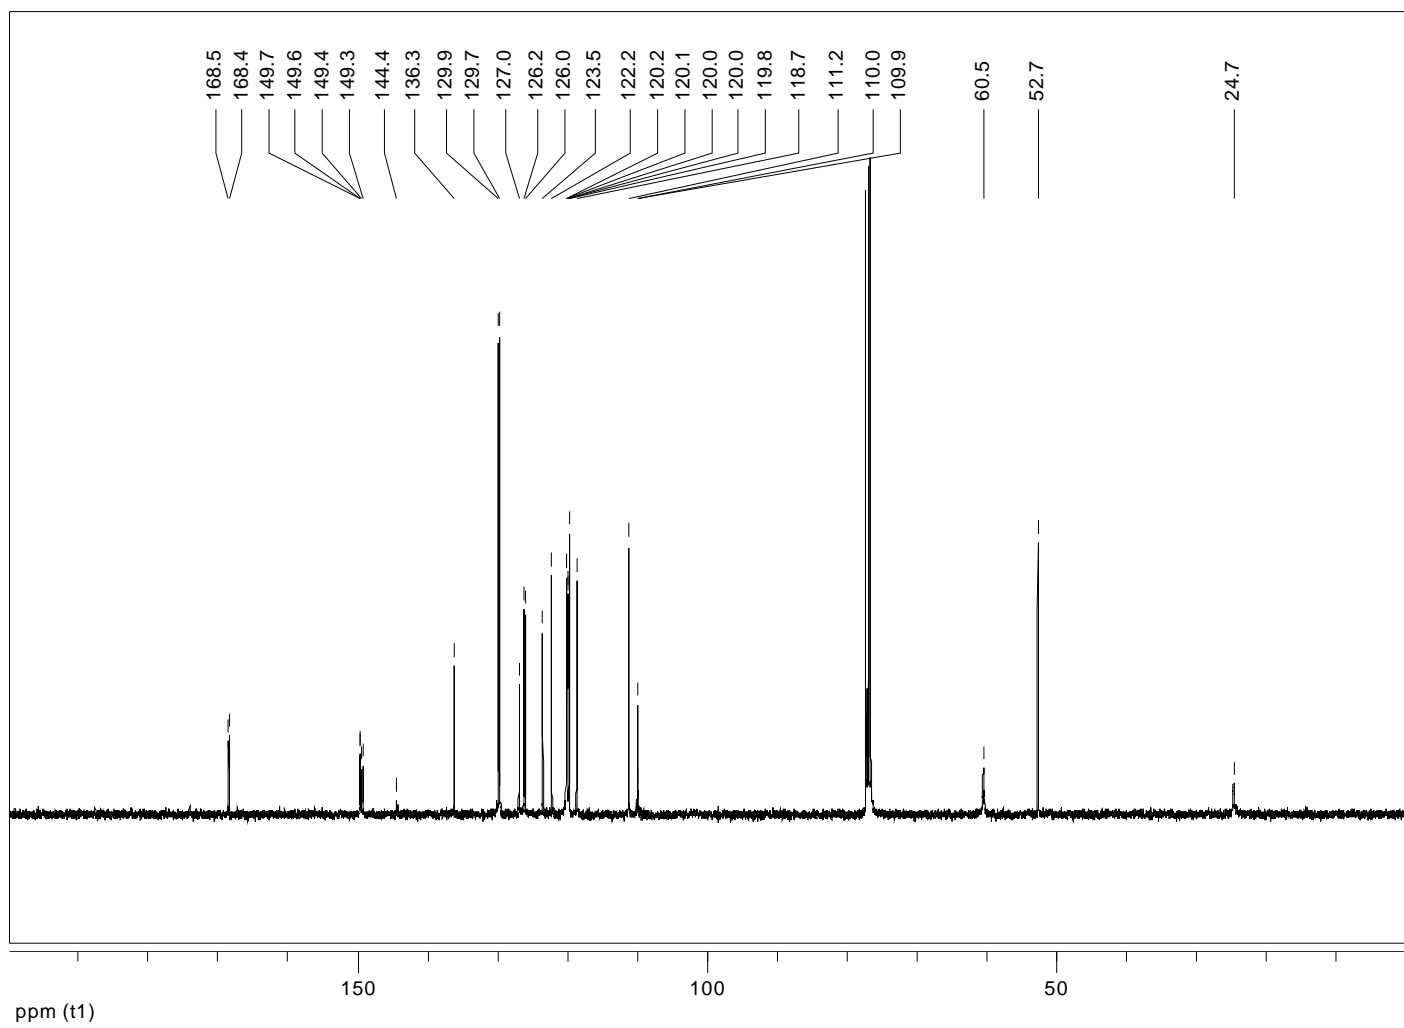

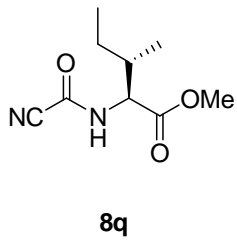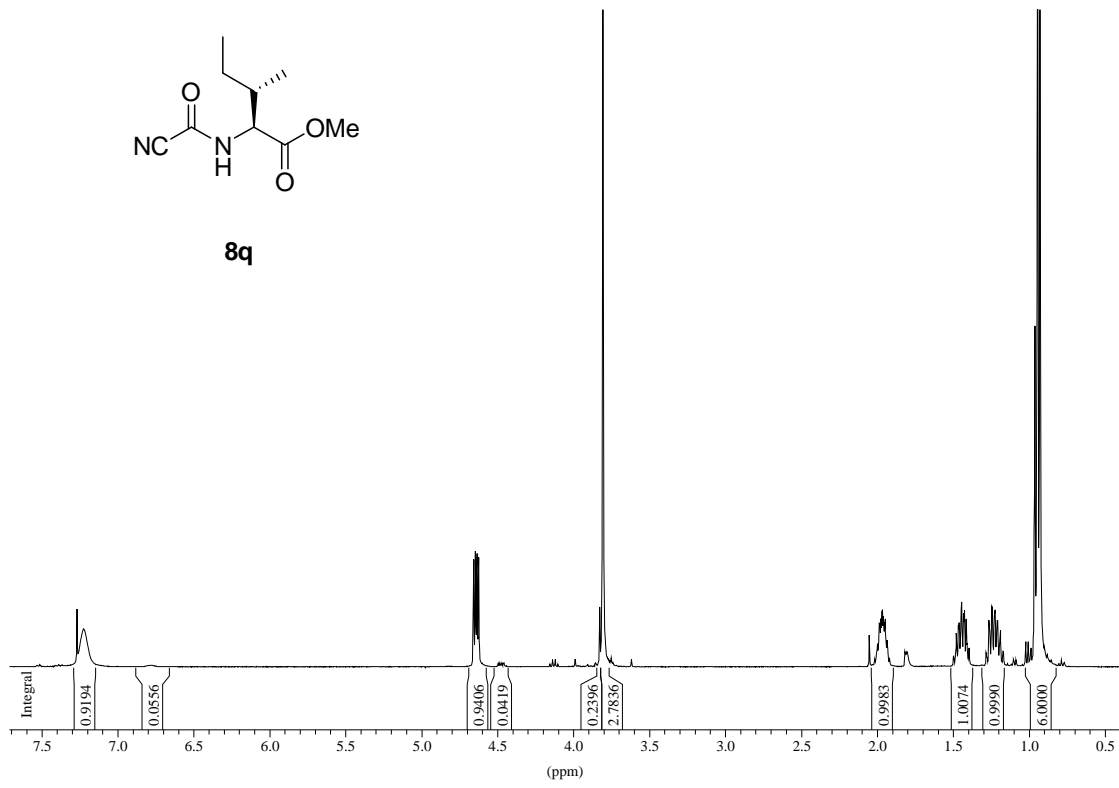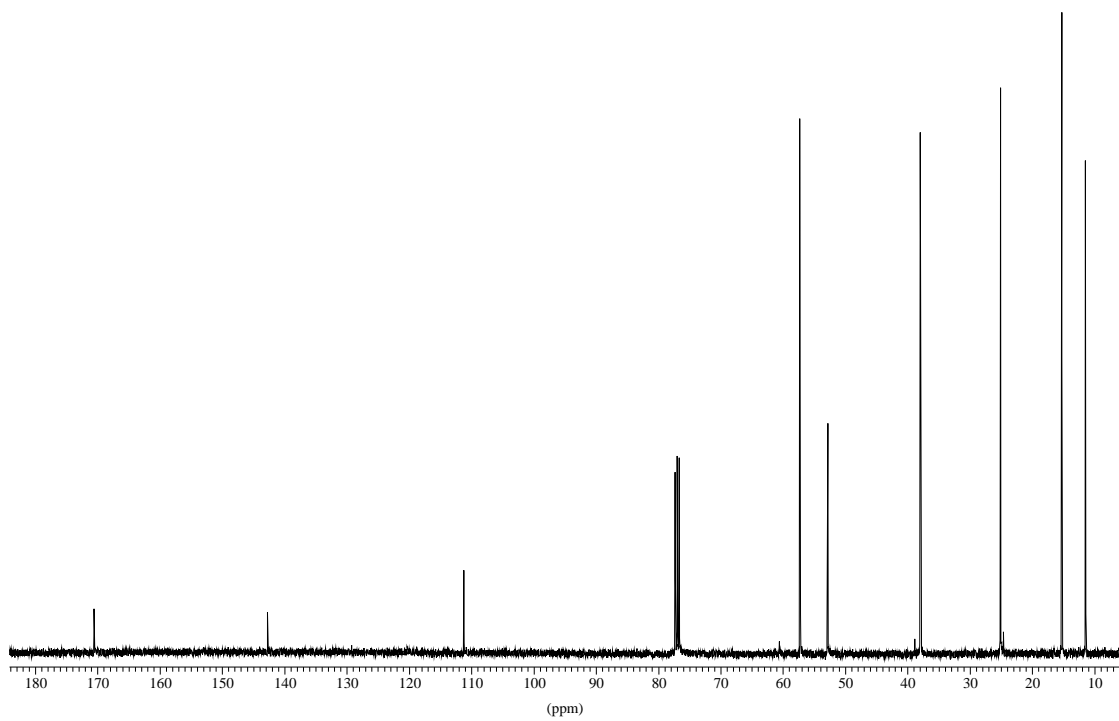

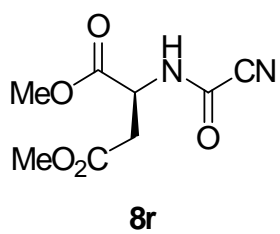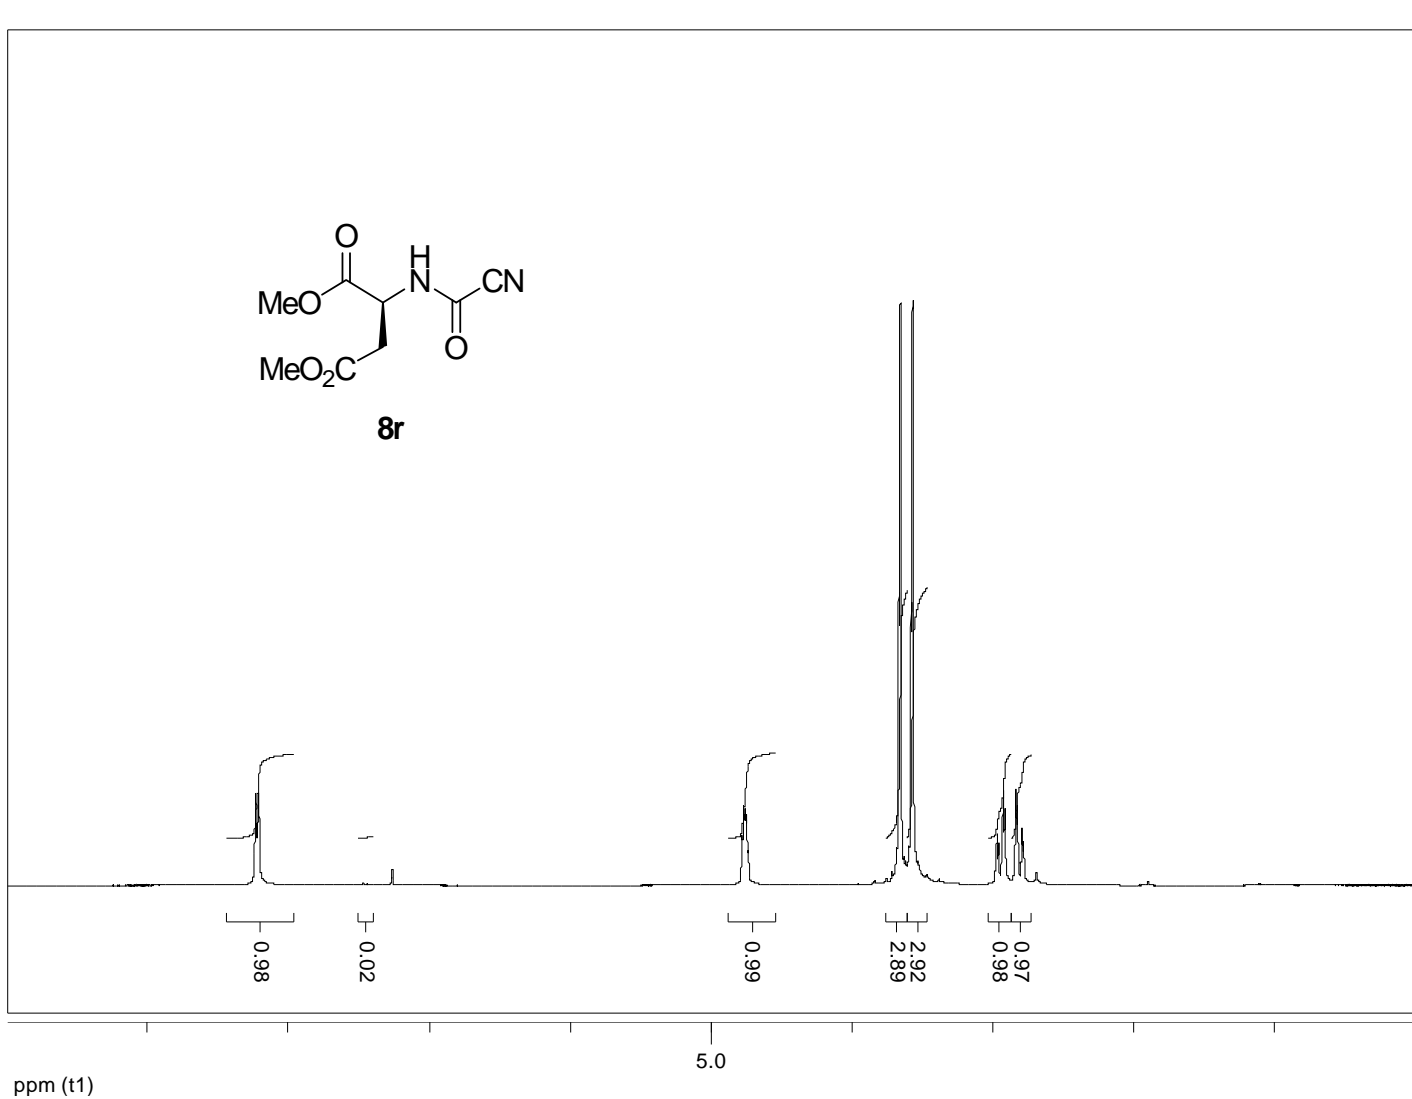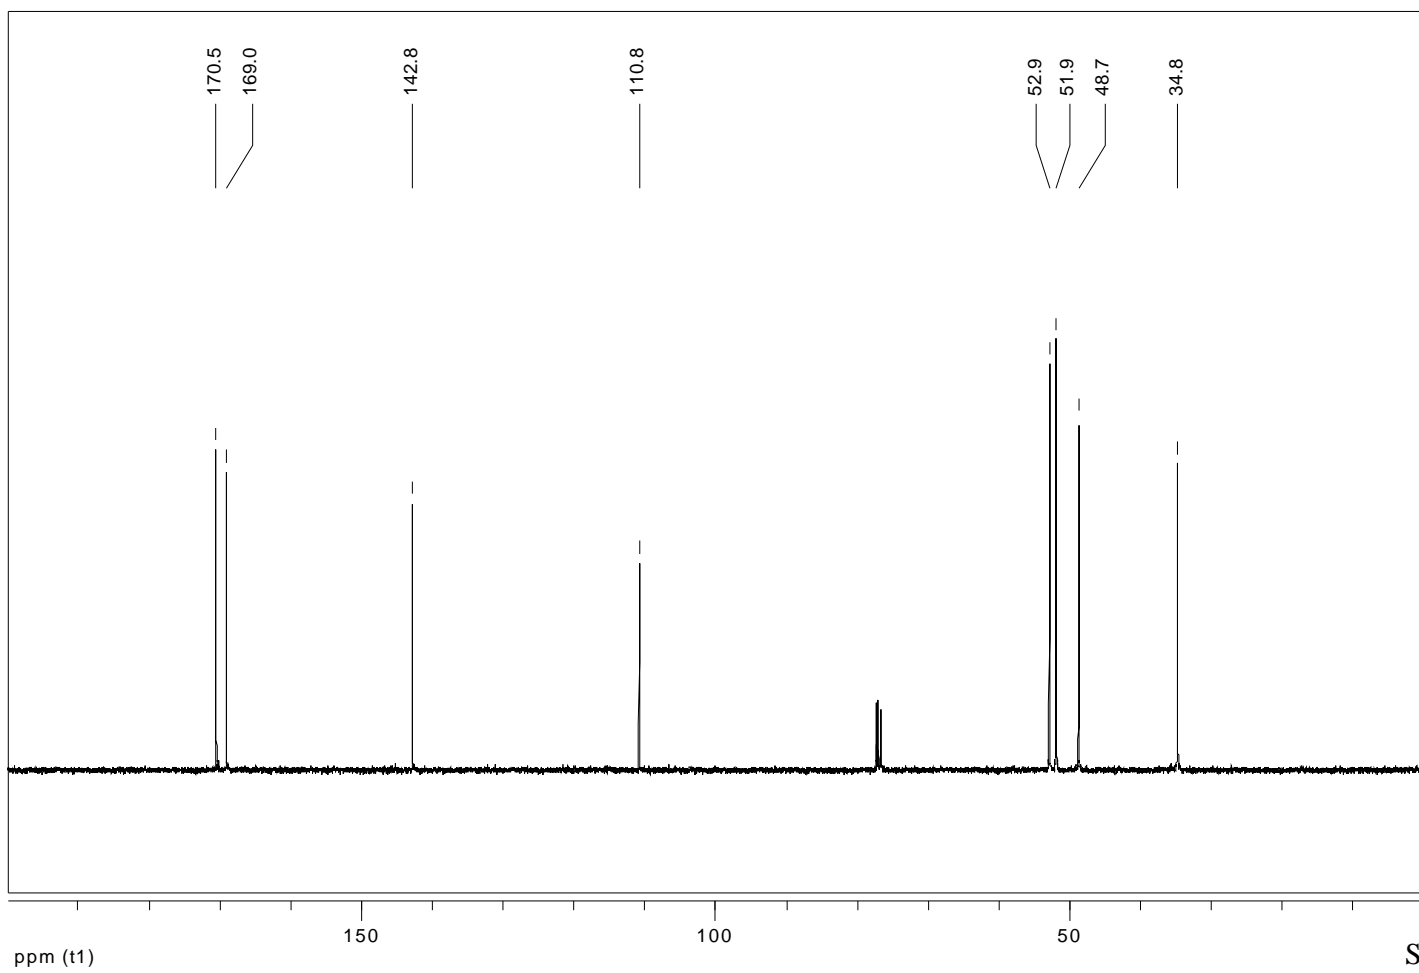



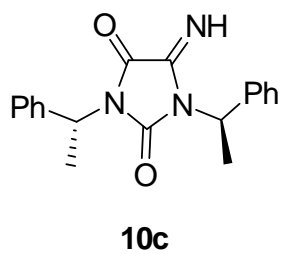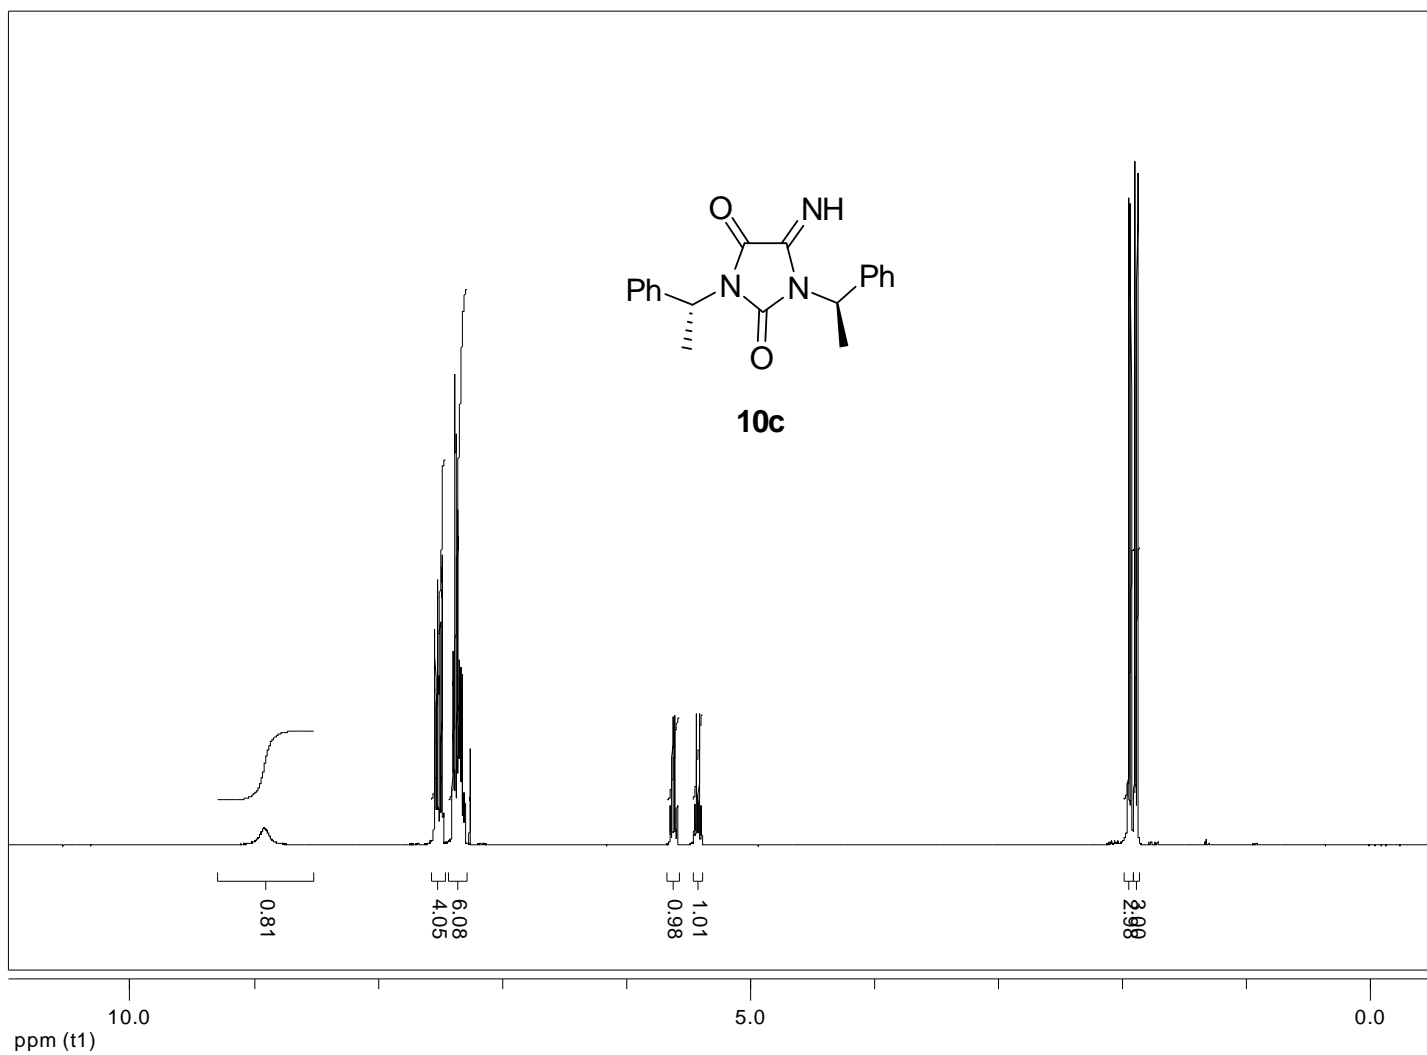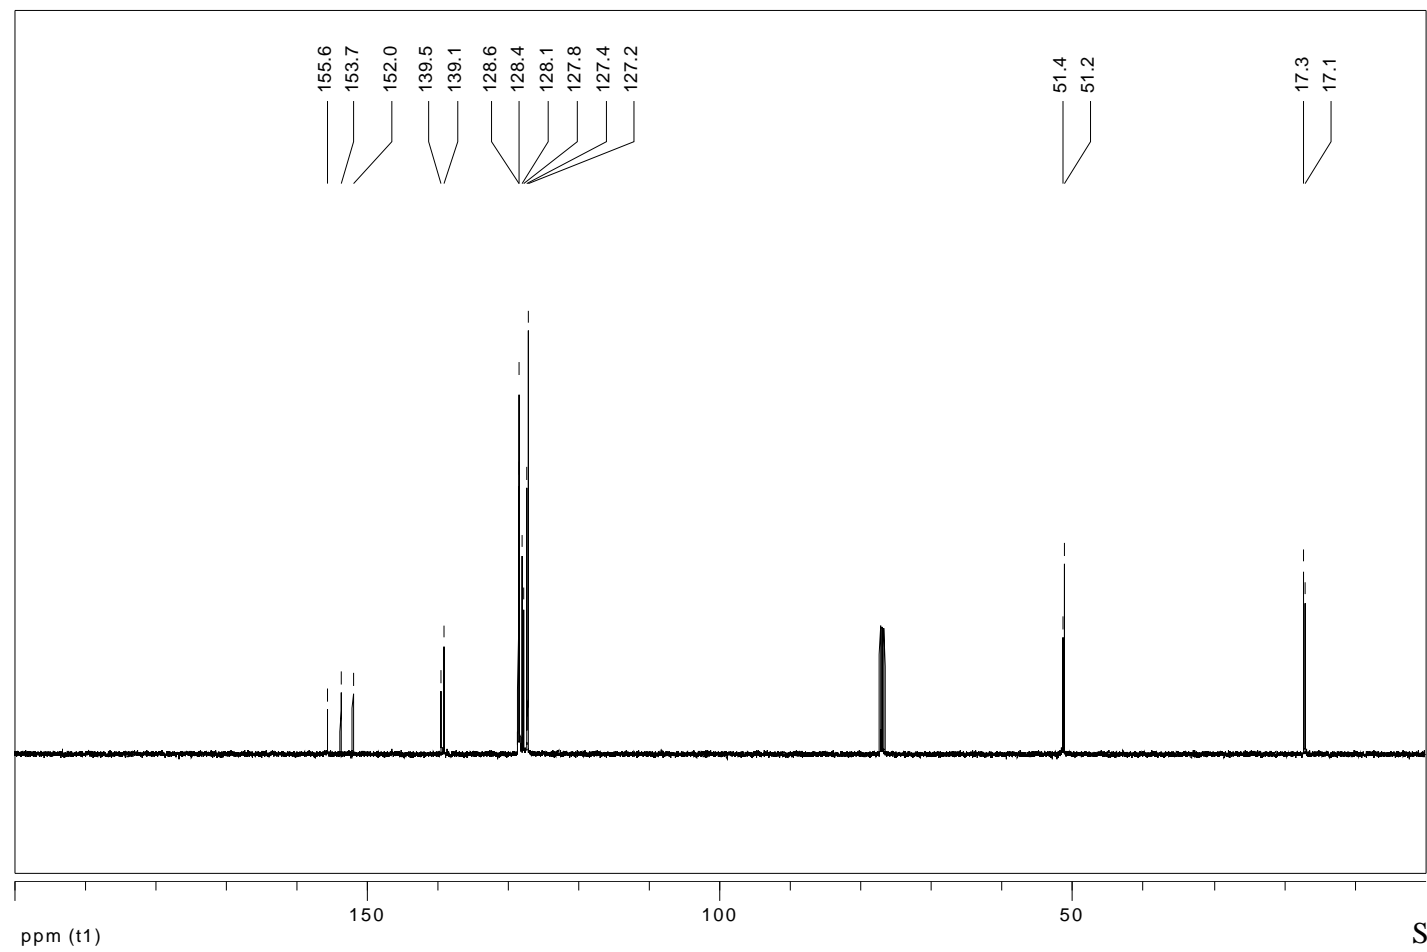

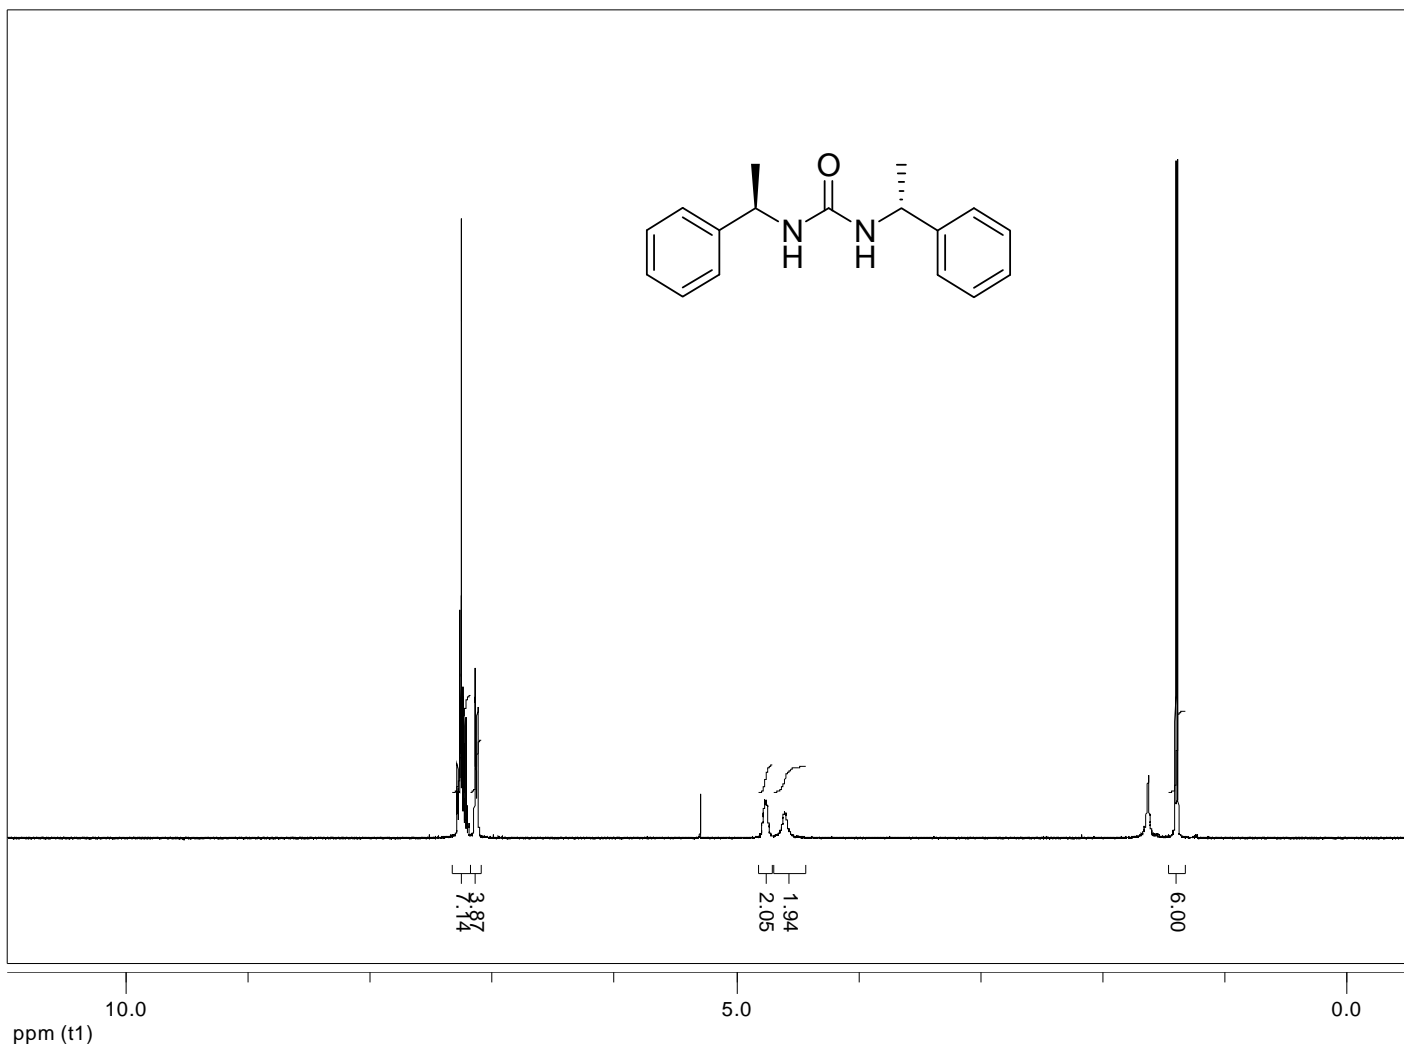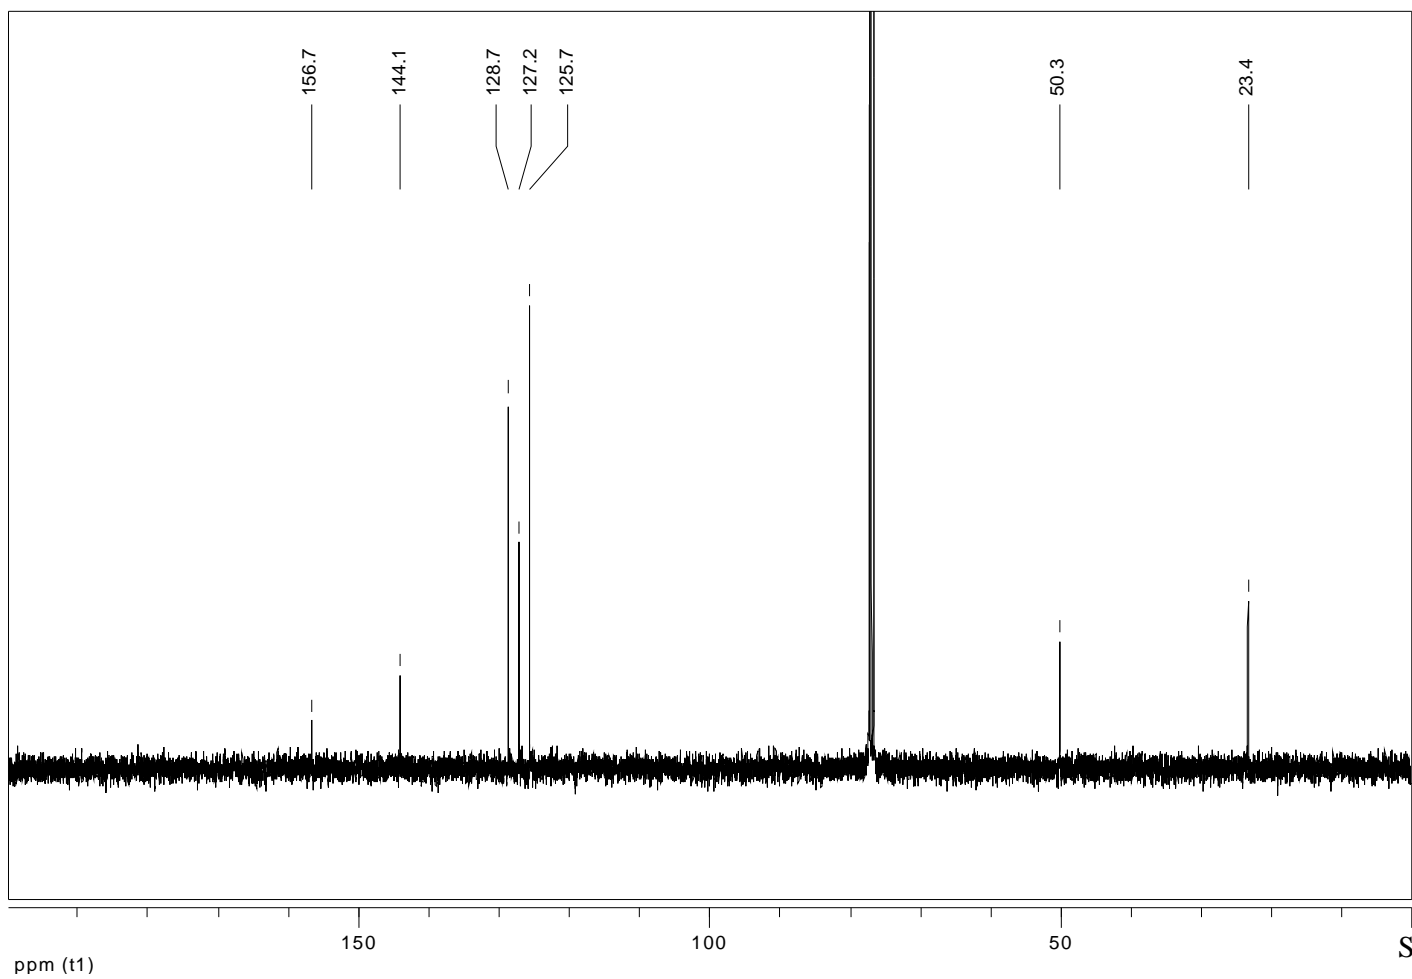

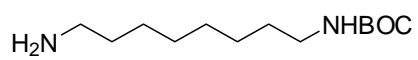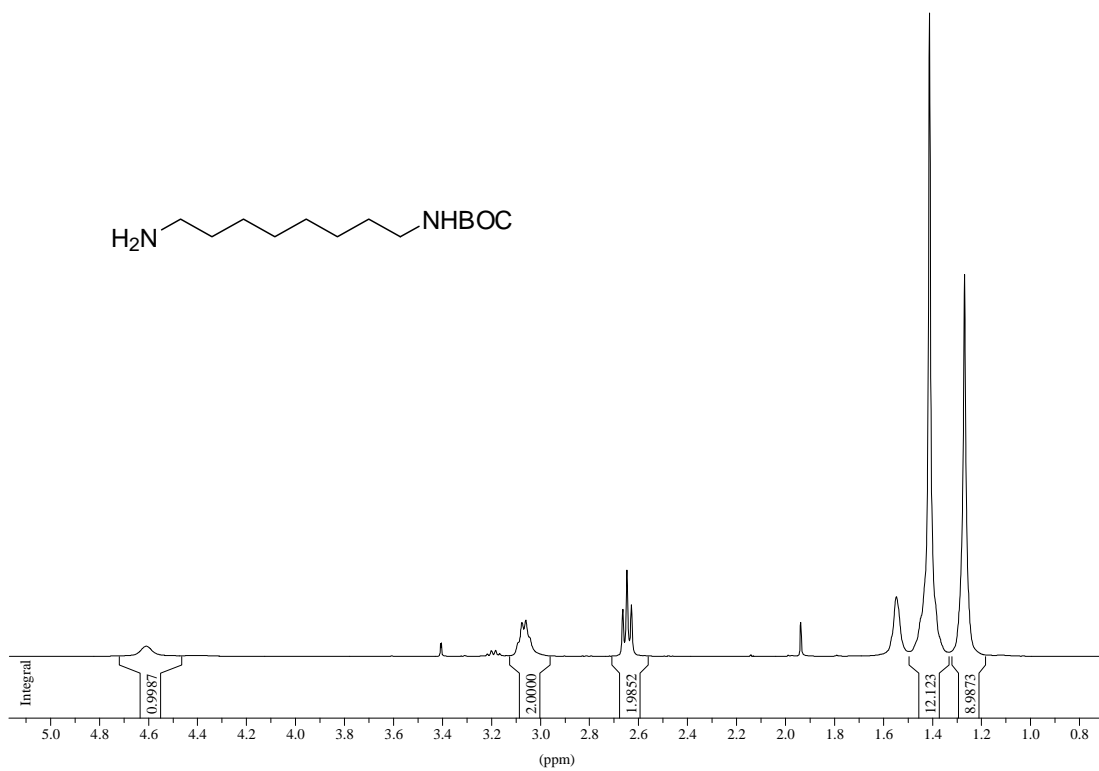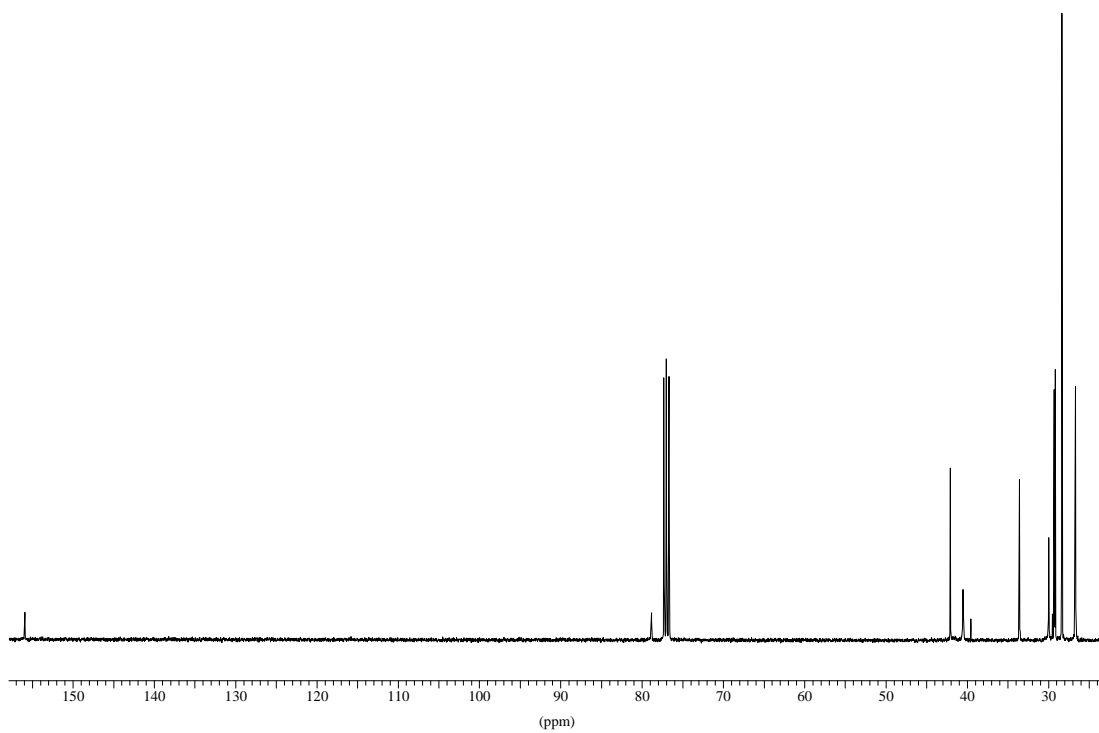

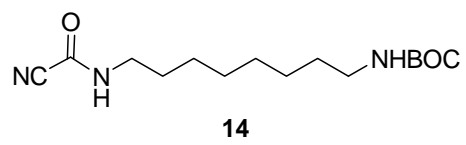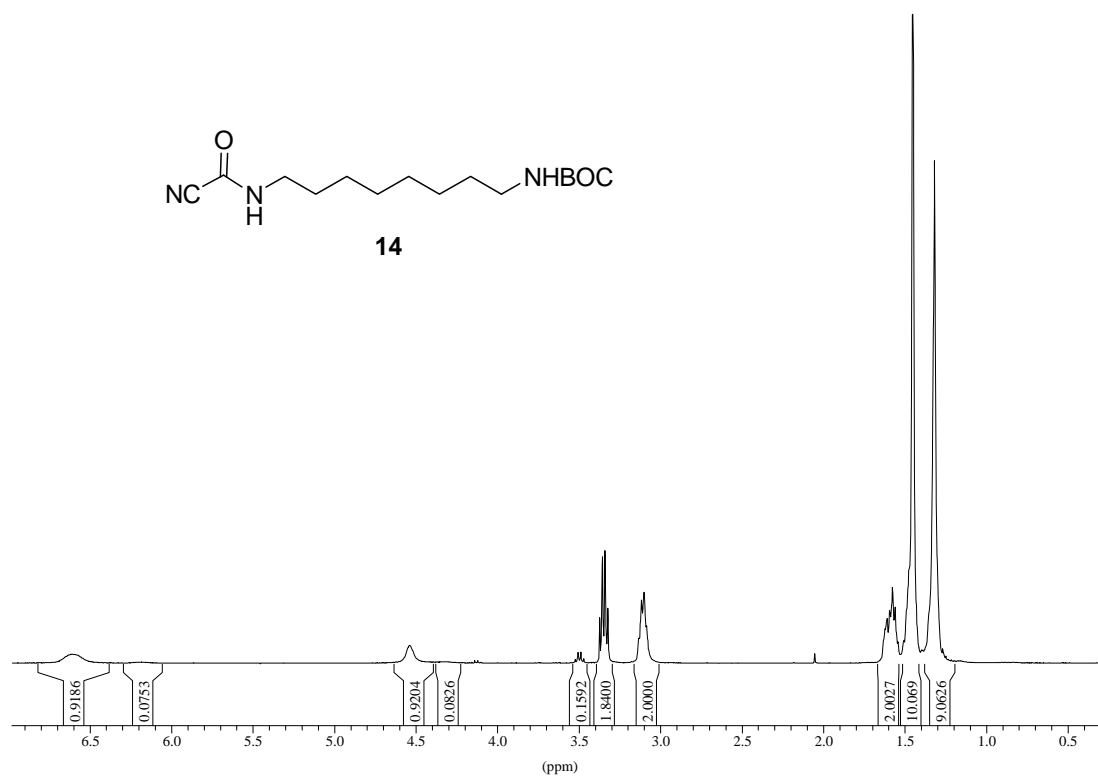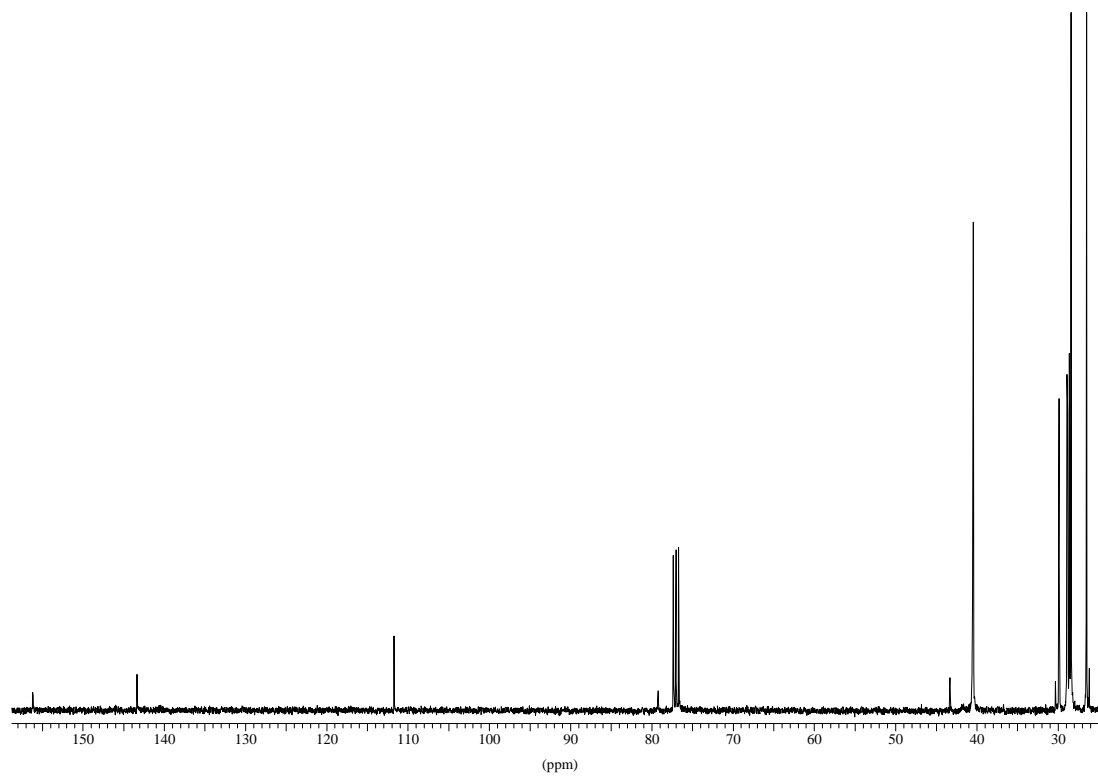

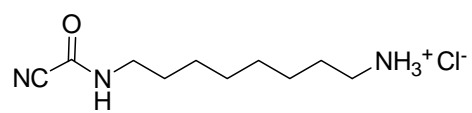

**15**  
(MeOH-d<sub>4</sub>)

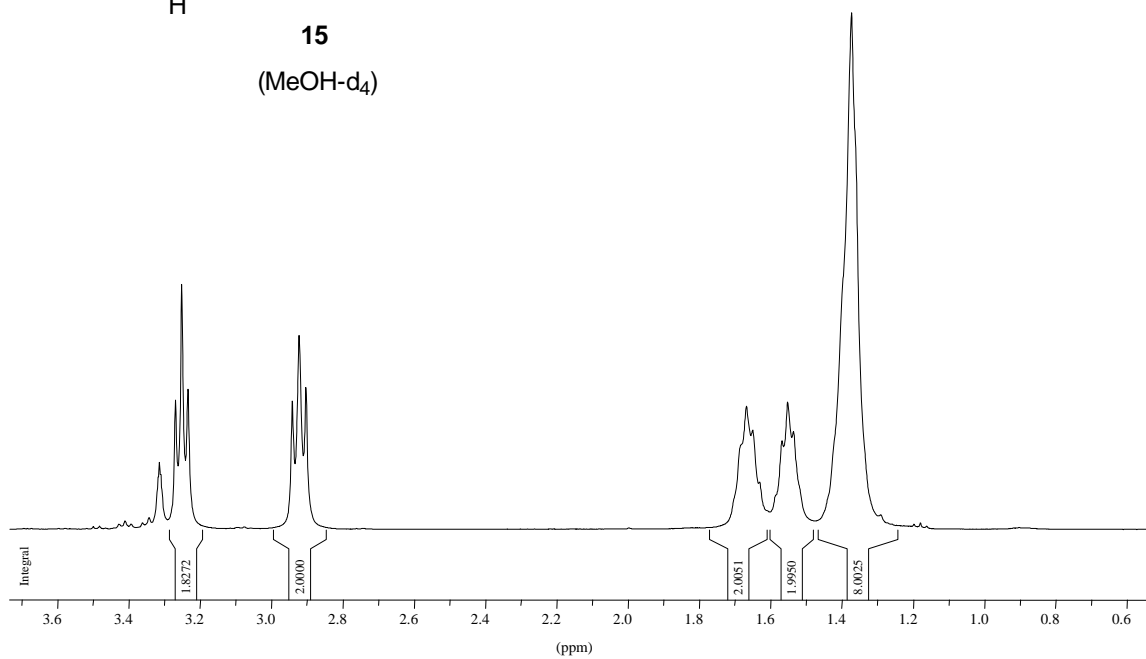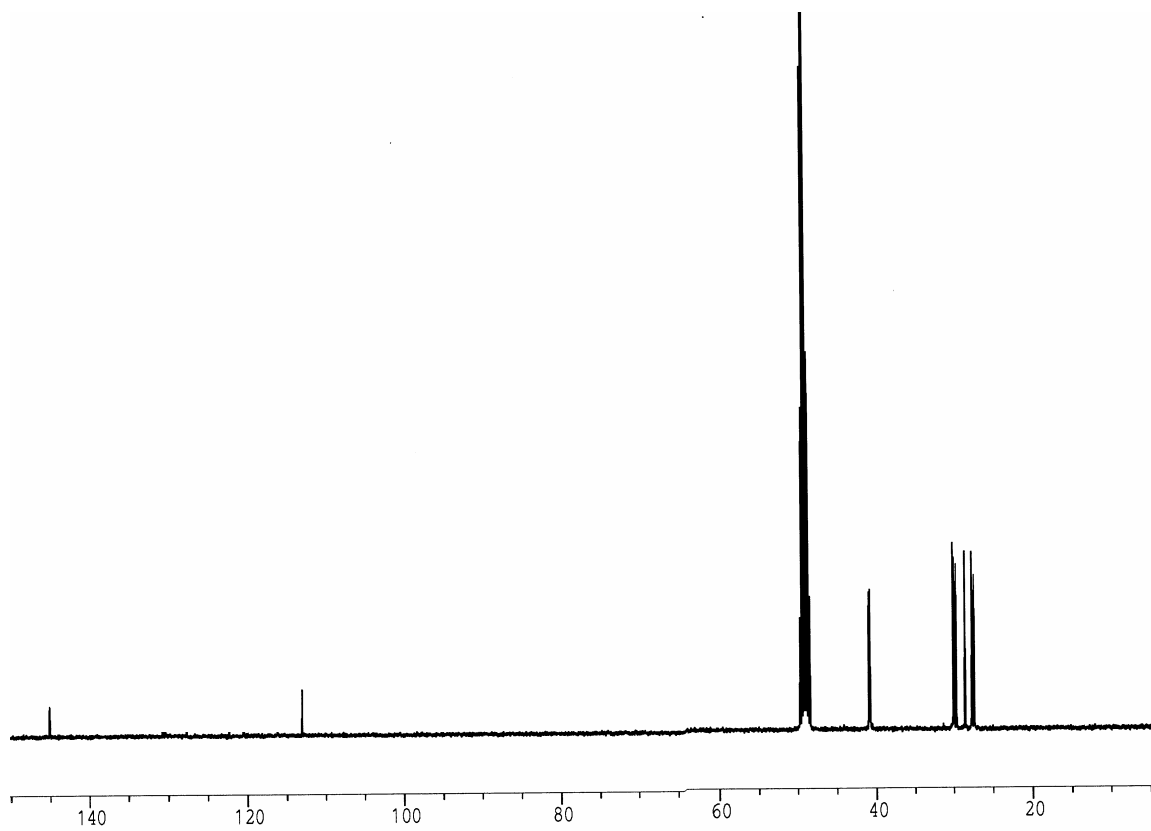

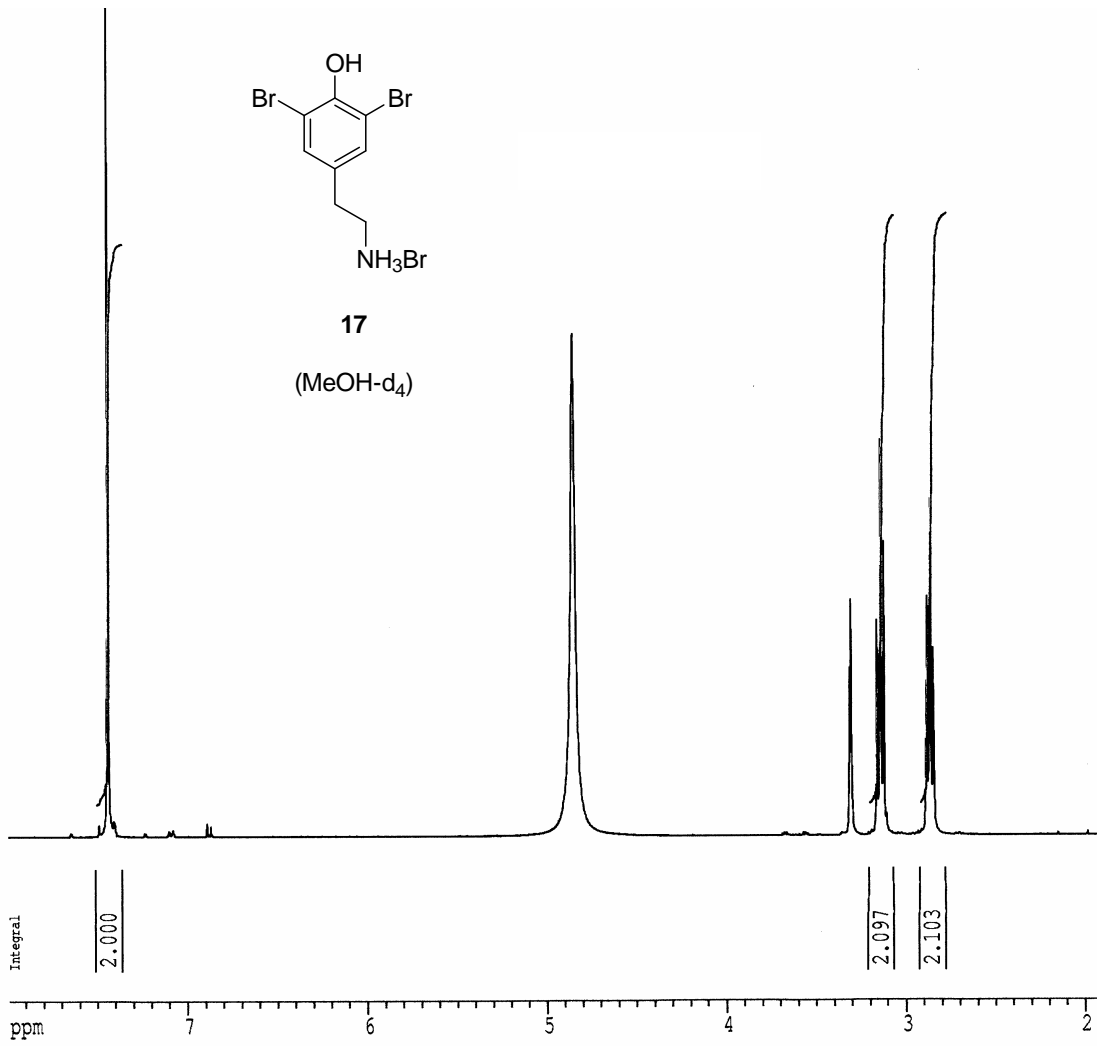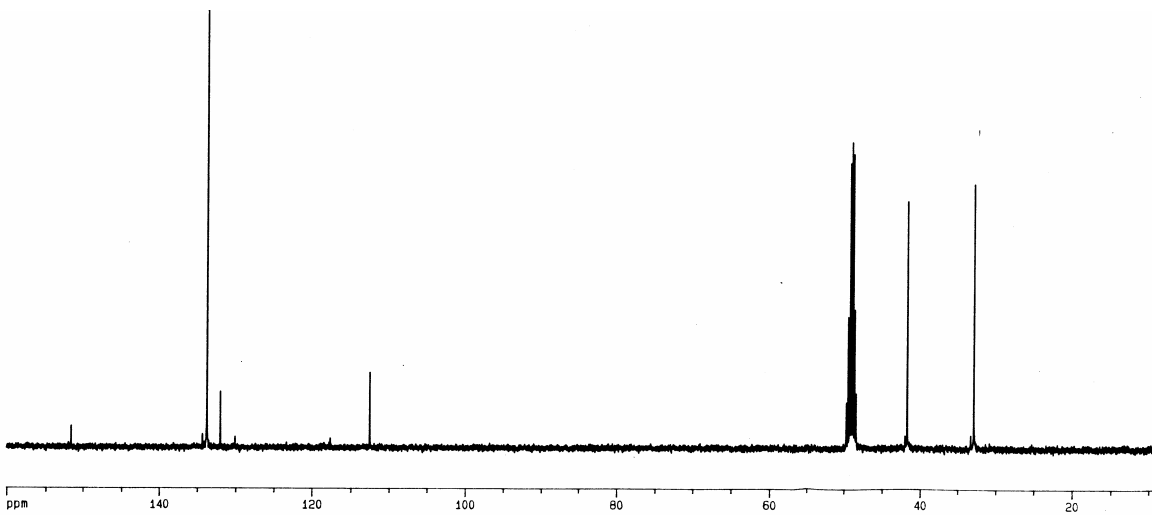

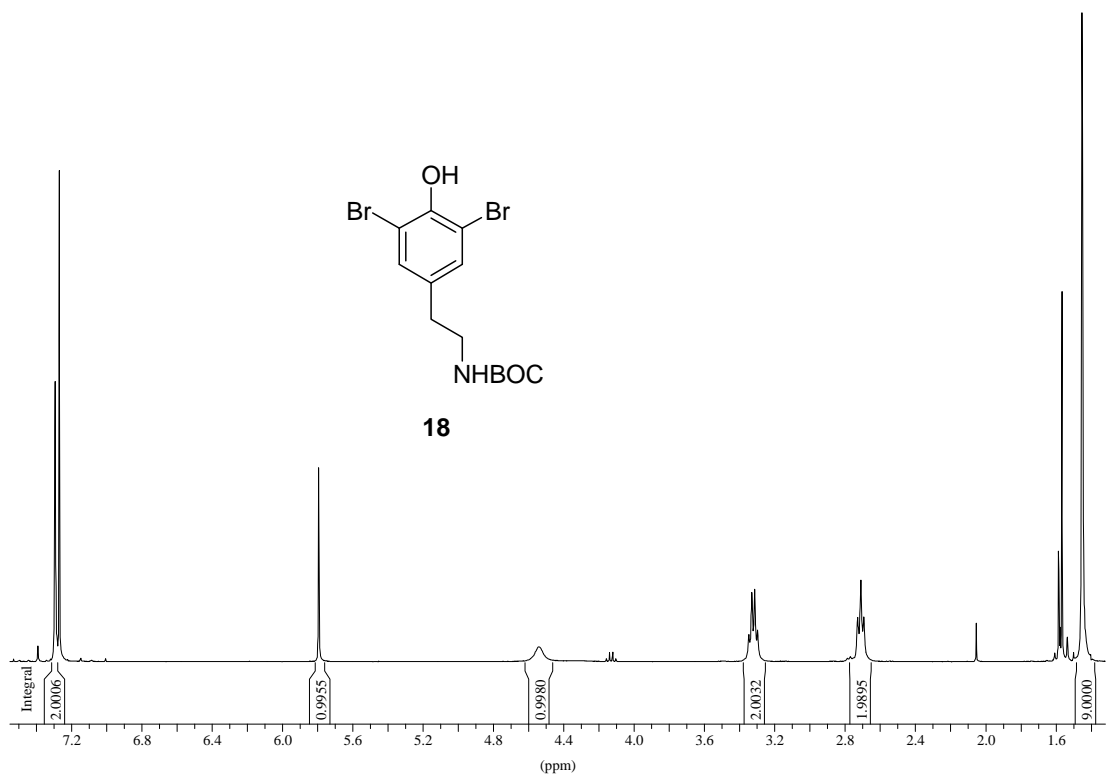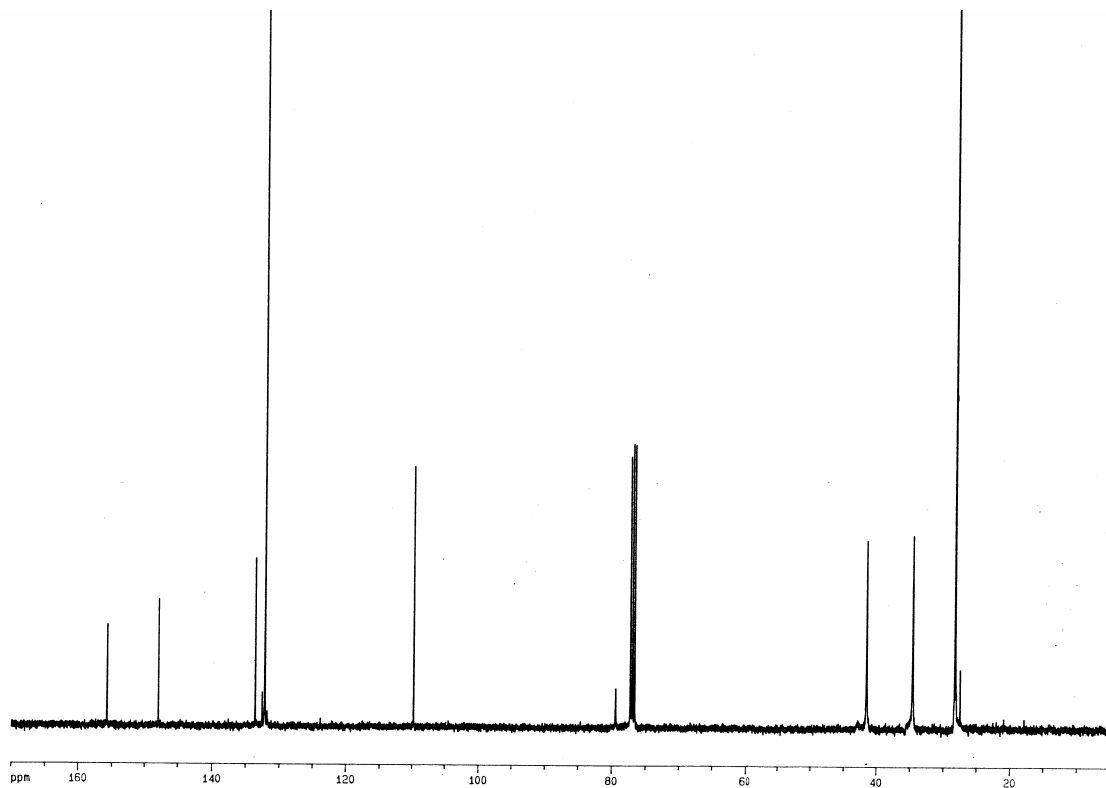

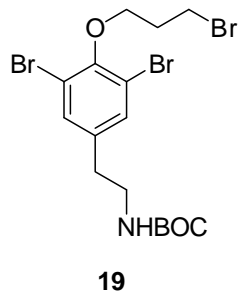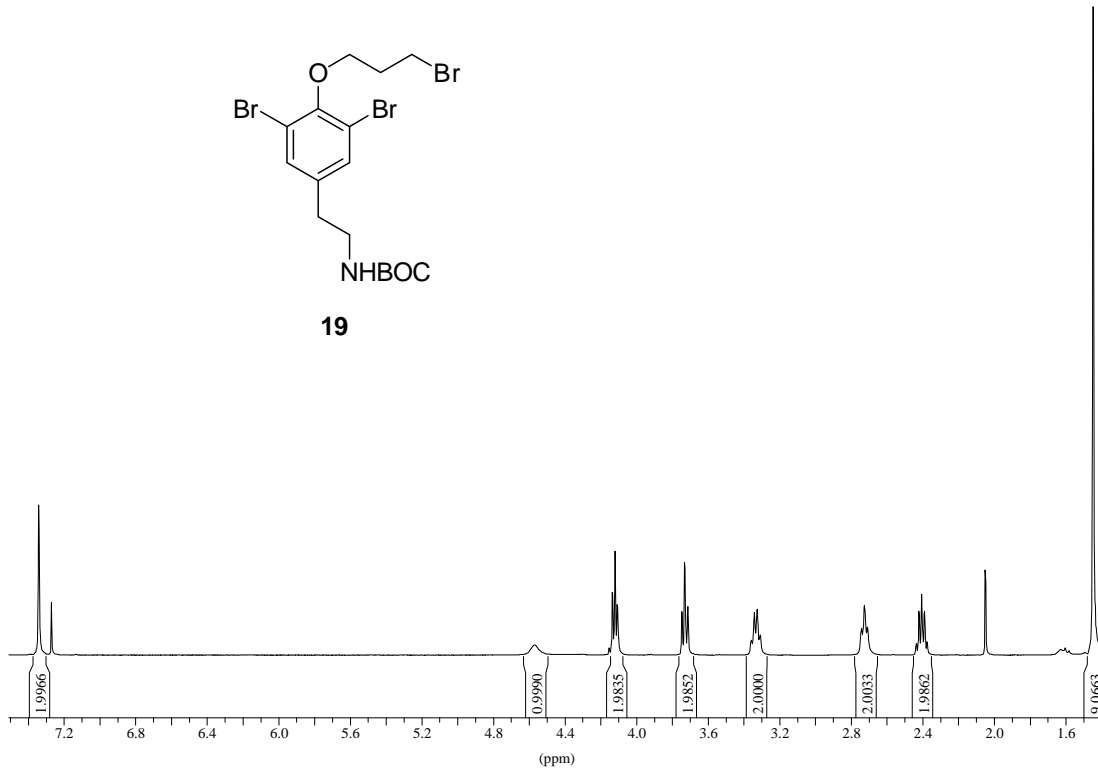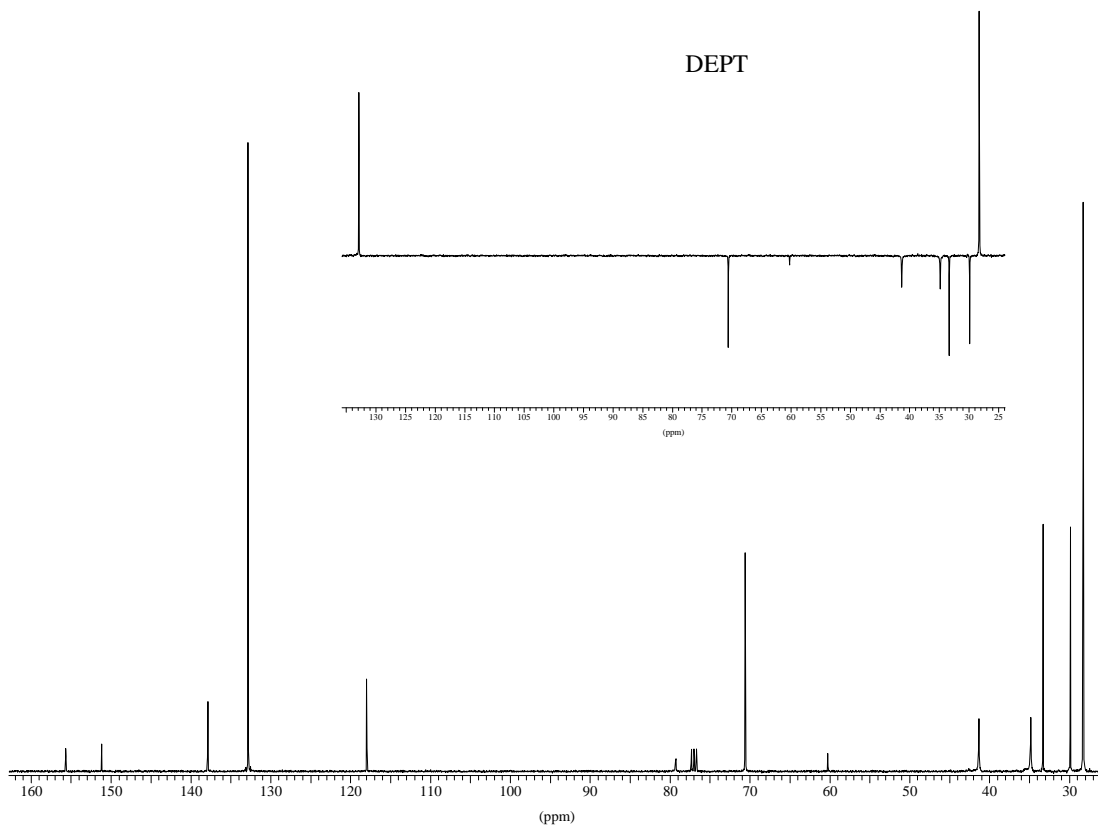



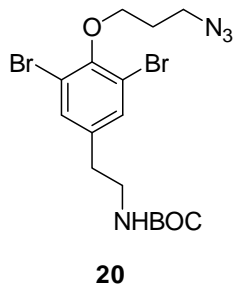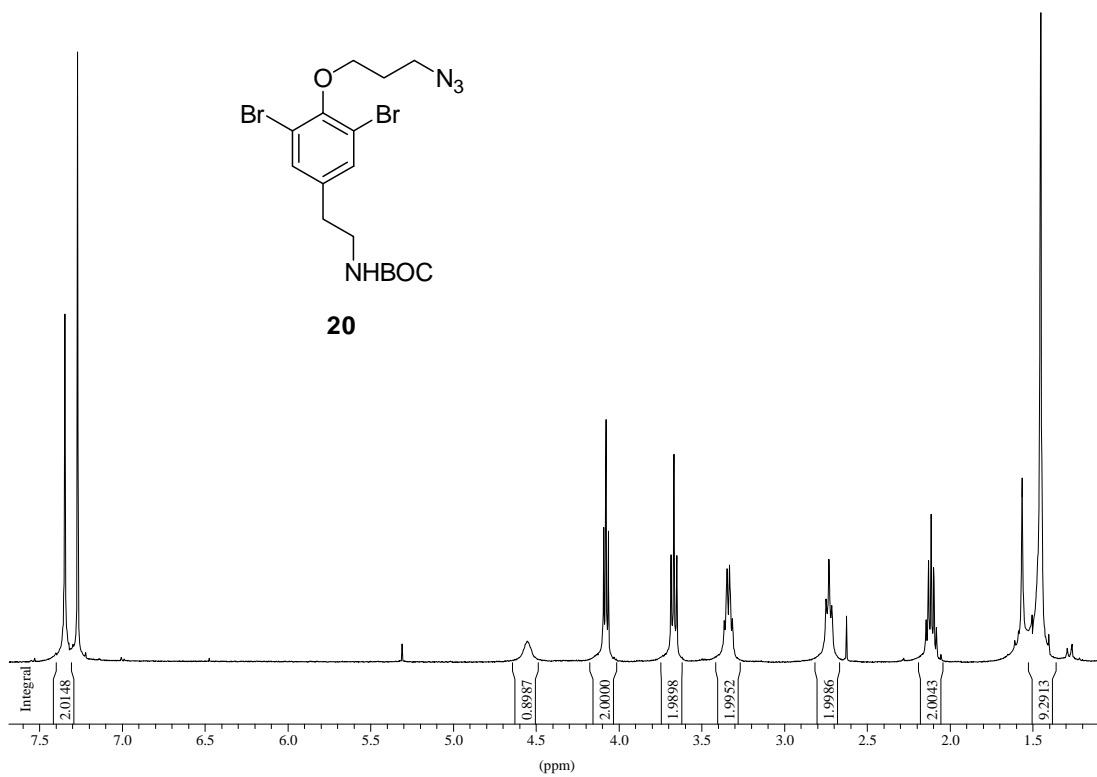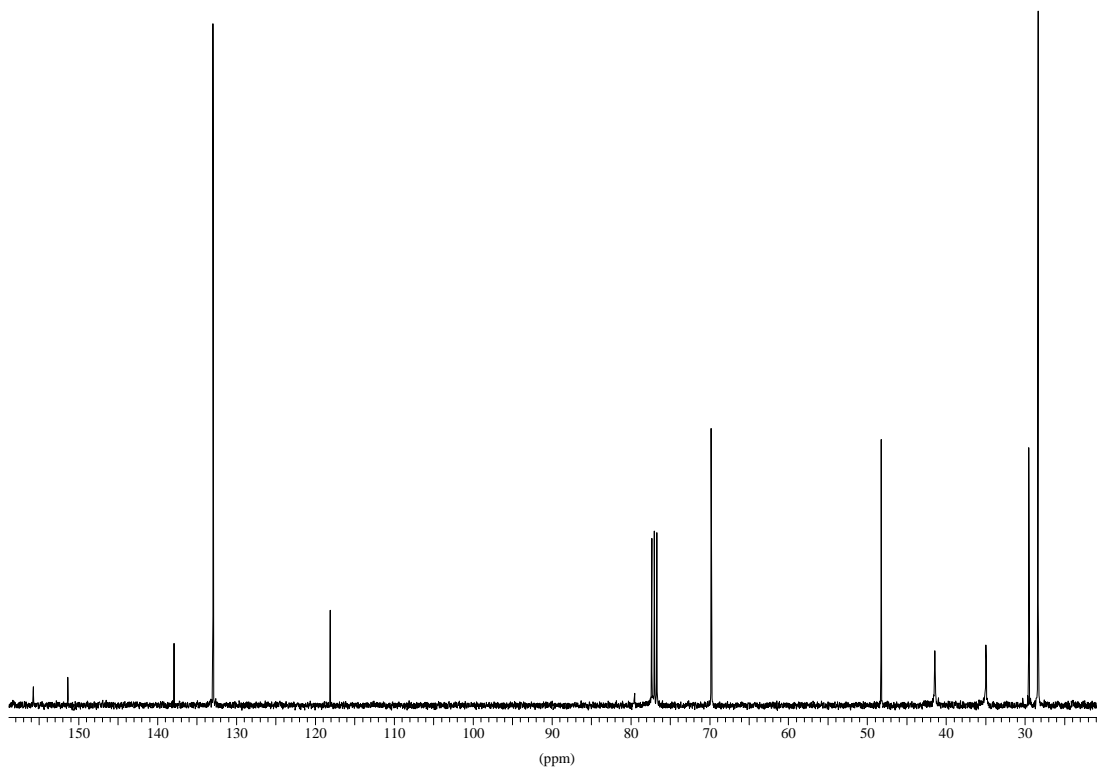

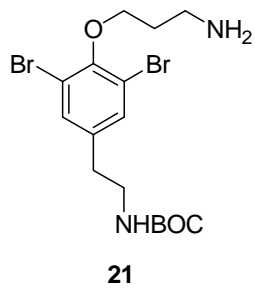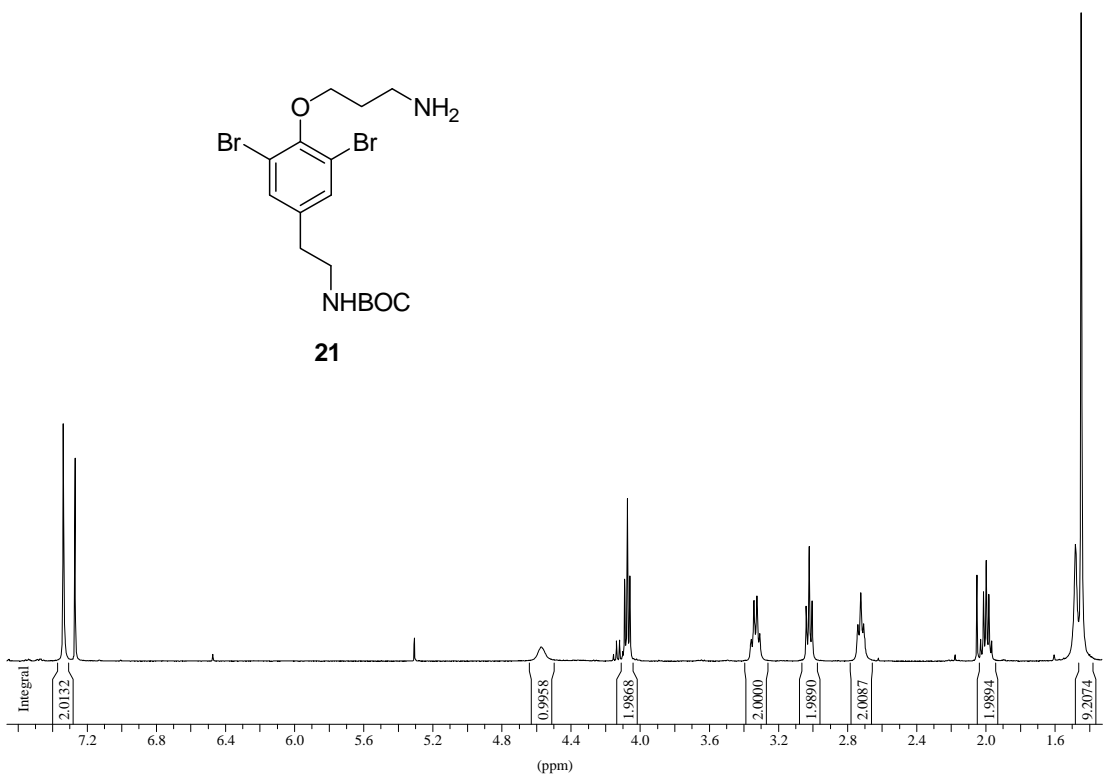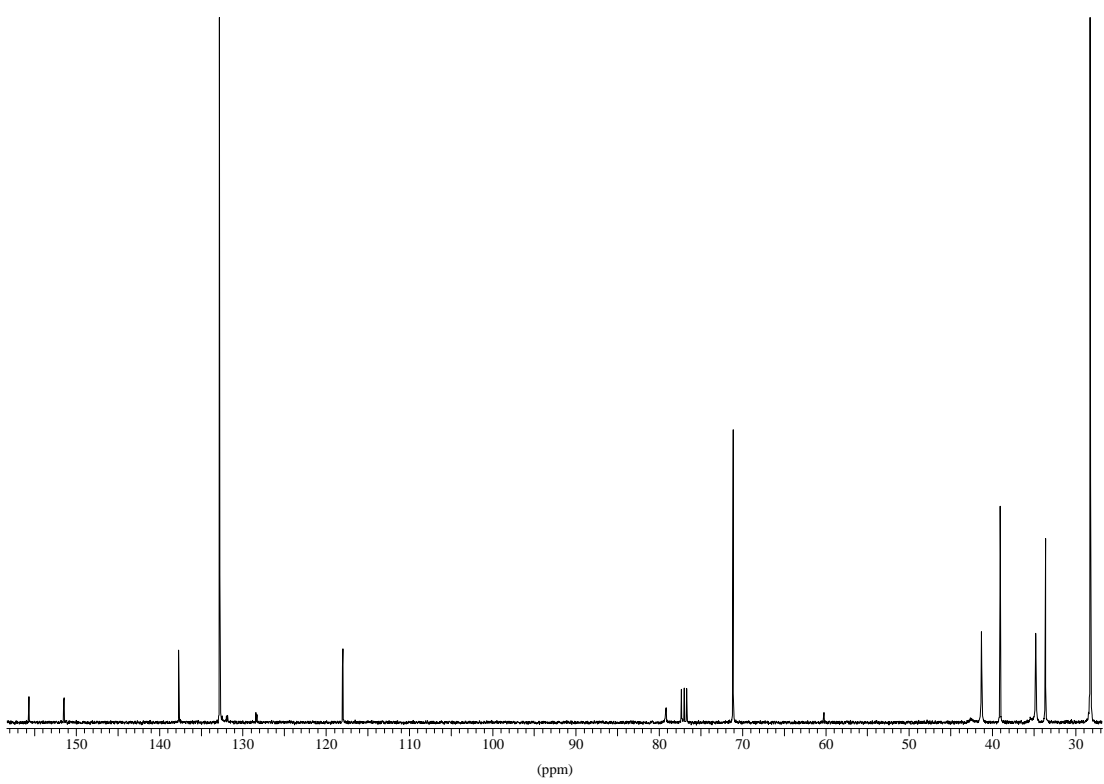

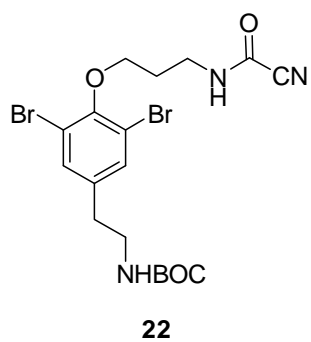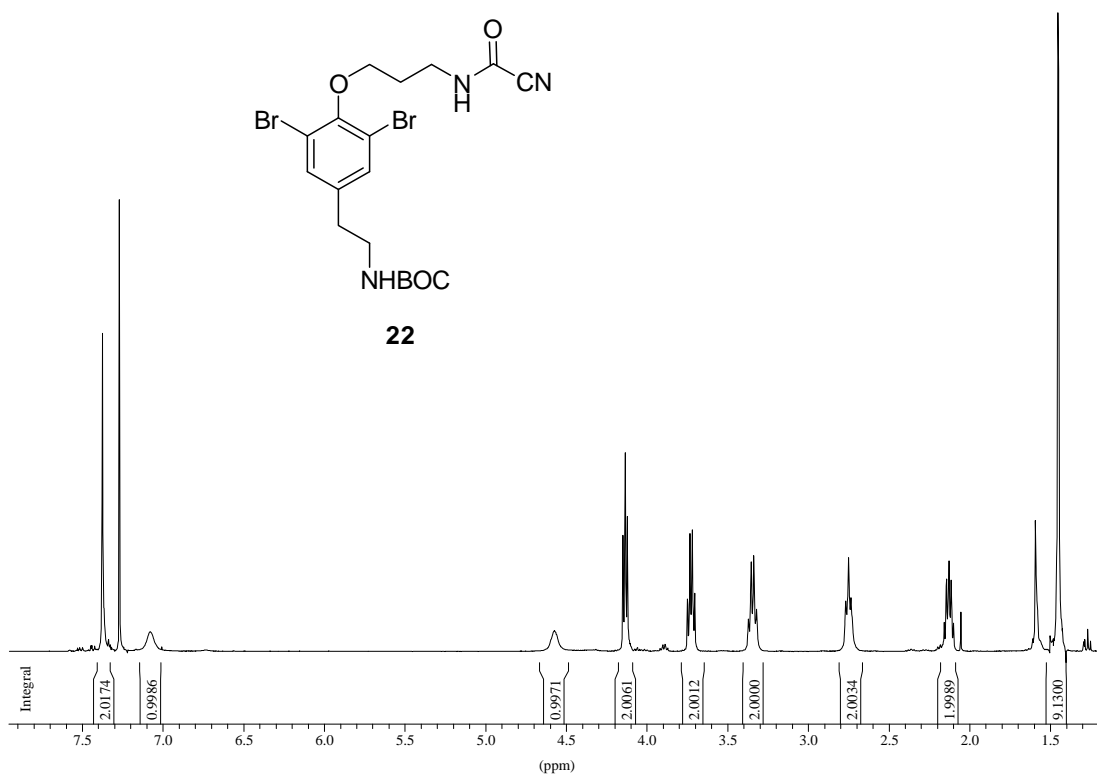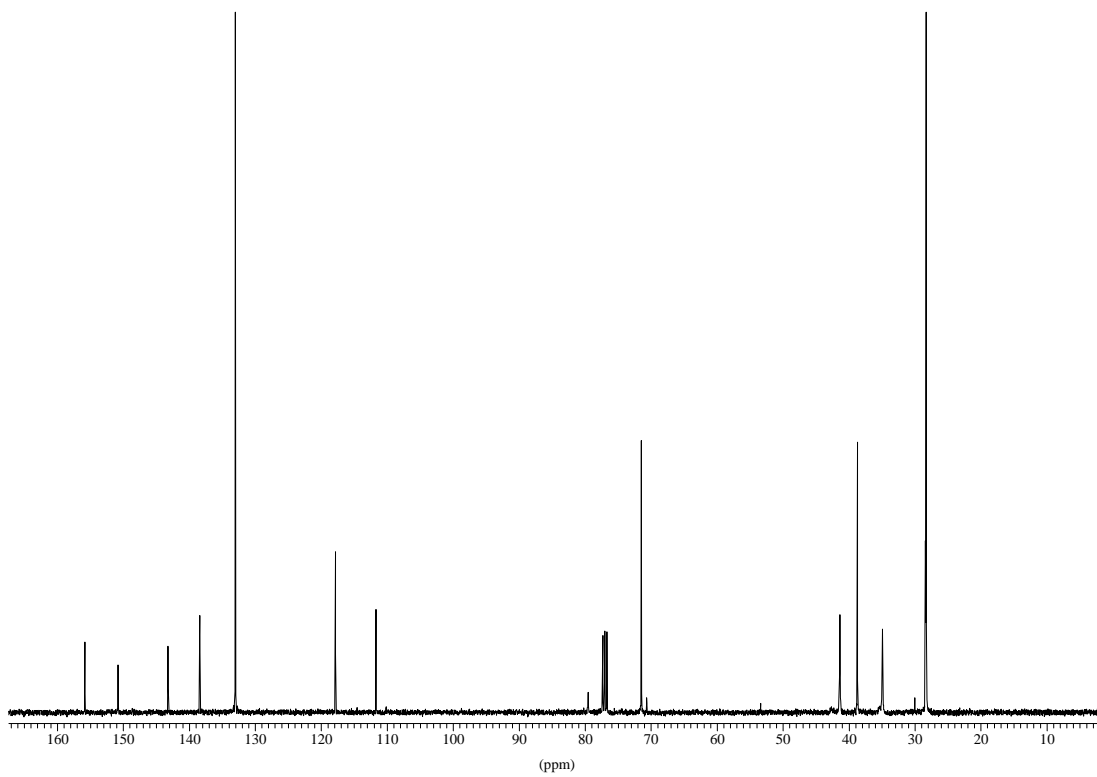

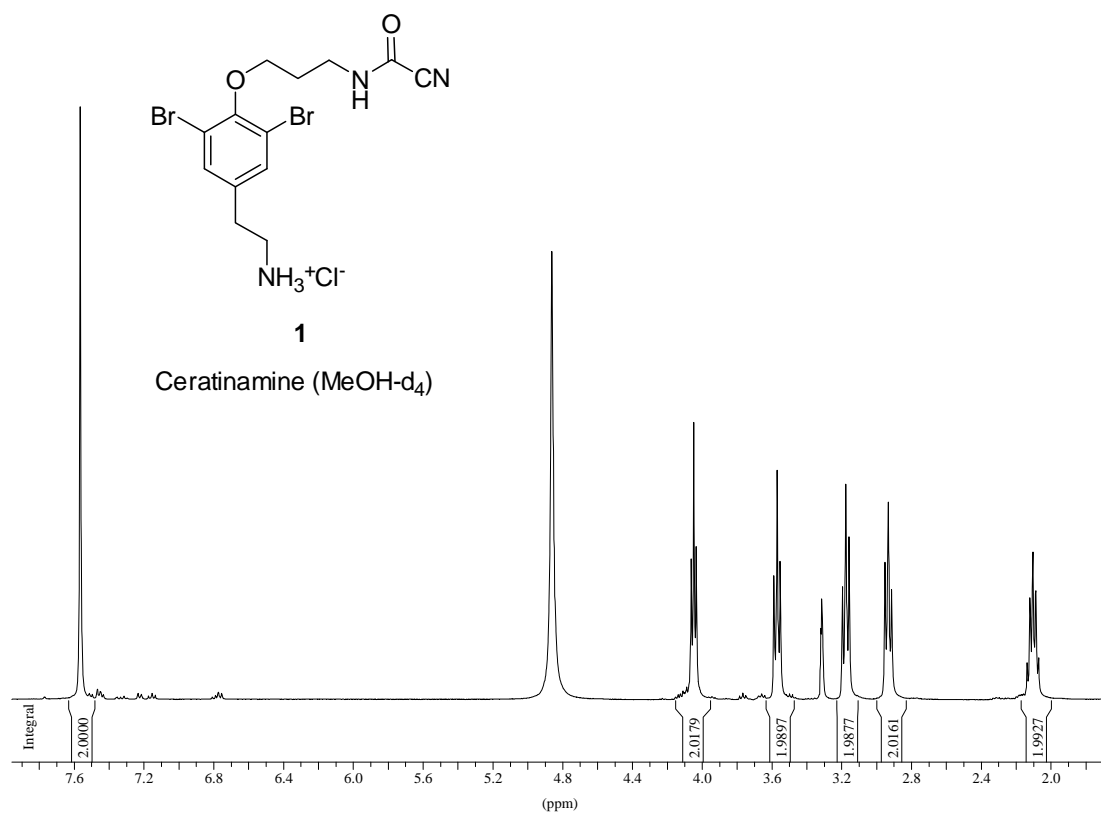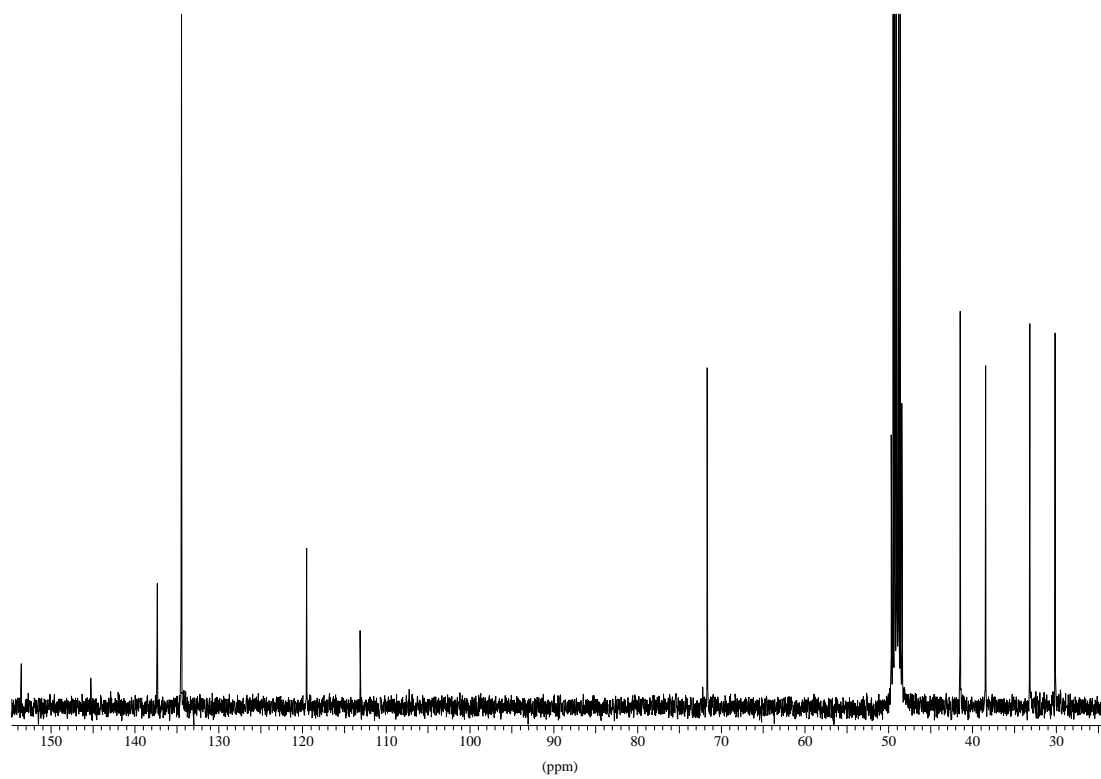

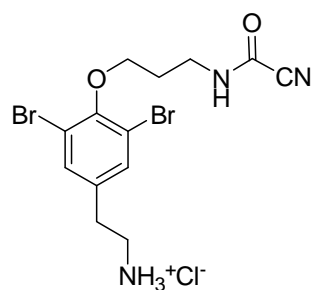

**1**  
Ceratinamine (DMSO-d<sub>6</sub>)

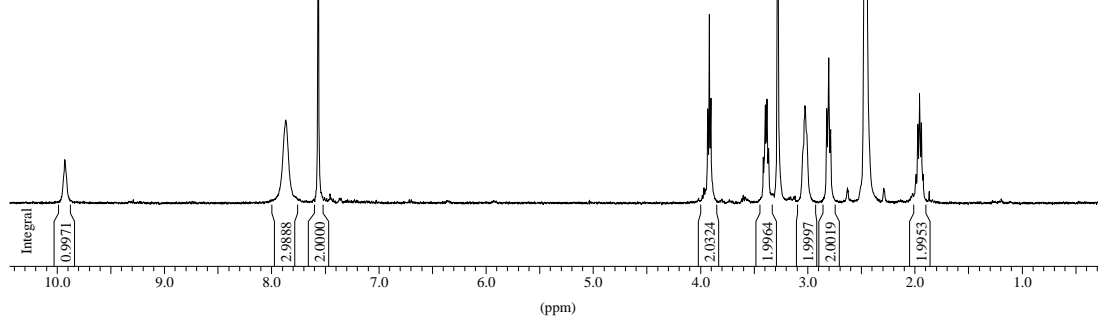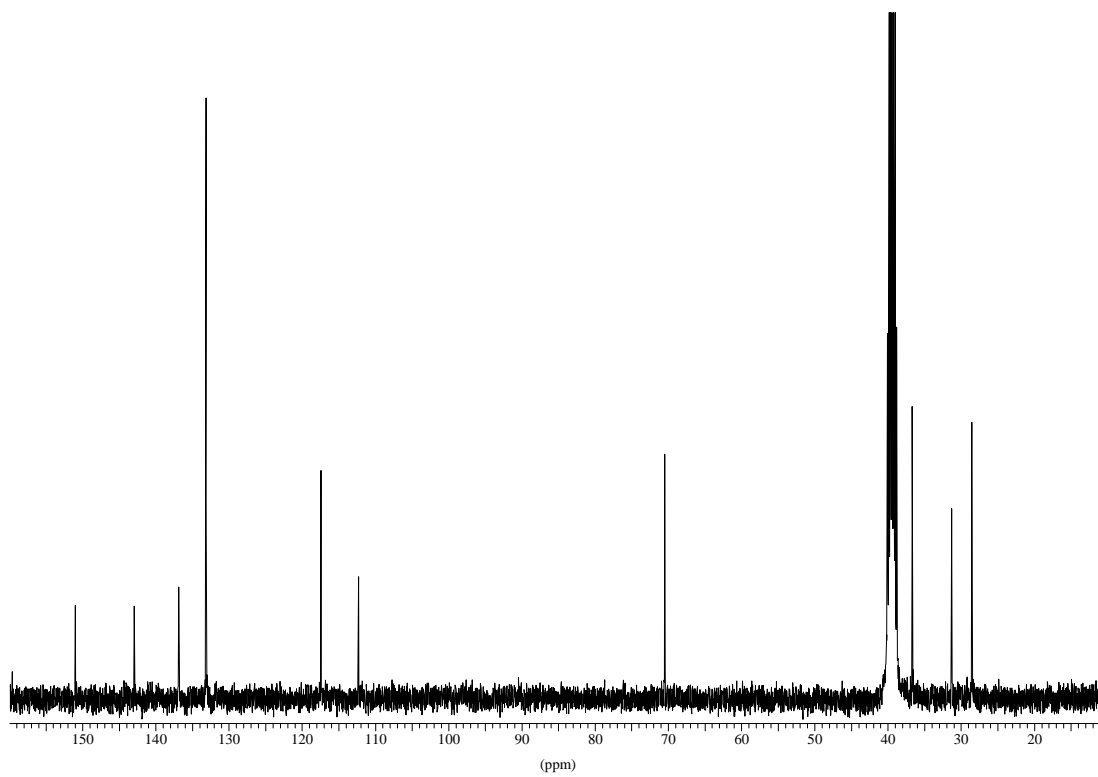

Supplement: b912043b.pdf [file b912043b.pdf]
